# Supplementary material for: Efficient synthesis of propargylamines from terminal alkynes, dichloromethane and tertiary amines over silver catalysts
Source: Royal Society of Chemistry journal article supplement (doi:10.1039/c3ob41878b), 2013-11-22

# Supporting Information

## Efficient synthesis of propargylamines from terminal alkynes, dichloromethane and tertiary amines over silver catalysts

Xiuling Chen,<sup>a</sup> Tieqiao Chen,<sup>a</sup> Yongbo Zhou,<sup>\*a</sup> Chak-Tong Au<sup>a,b</sup>, Li-Biao Han<sup>a</sup>,  
and Shuang-Feng Yin<sup>\*a</sup>

[a] State Key Laboratory of Chemo/Biosensing and Chemometrics, College of Chemistry and Chemical Engineering, Hunan university, Changsha 410082 (China)

[b] Department of Chemistry, Hong Kong Baptist University, Kowloon Tong, Hong Kong, P. R. China  
[Fax: (+86)-731-88821171; E-mail: zhouyb@hnu.edu.cn (Dr. Y-B. Zhou) ; sf\_yin@hnu.edu.cn (Prof. Dr. S.F. Yin).]

### Contents

|                                                                                       |   |
|---------------------------------------------------------------------------------------|---|
| General remarks                                                                       | 1 |
| General procedure                                                                     | 2 |
| Optimization of reaction condition<br>Effect of catalyst loading<br>Effect of solvent | 3 |
| <sup>1</sup> H and <sup>13</sup> C NMR data of products                               | 4 |
| References                                                                            | 5 |
| Copies of <sup>1</sup> H and <sup>13</sup> C NMR spectra                              | 6 |

## 1. General remarks

All non-aqueous reactions and manipulations were performed in air atmosphere using standard Schlenk techniques. All solvents before use were dried, degassed by standard methods, and stored under nitrogen. The reactions were monitored by GC and GC-MS. The  $^1\text{H}$  NMR and  $^{13}\text{C}$  NMR spectra were recorded on a Varian INOVA-400 spectrometer at 400 MHz and 100 MHz respectively, and chemical shifts were reported in parts per million (ppm) downfield from TMS using the solvent resonance as internal standard. Flash column chromatography was performed using silica gel 30-60  $\mu\text{m}$ . GC-MS results were recorded on GC-MS QP2010, and GC analysis was performed on GC 7820A. Terminal alkynes were purchased from Energy Chemical, Alfa Aesar, Aladdin or Maya Reagent; they were dried and degassed by standard methods and stored under nitrogen before use. The tertiary amines were purchased from Aladdin, dried, and degassed by standard methods before use.

## 2. General procedure

5 mol% AgOAc, 1.0 mmol terminal alkynes, 15 mmol dichloromethane, 3 mmol tertiary amines were dissolved in 1 mL dioxane under  $\text{N}_2$  atmosphere and stirred at 120  $^\circ\text{C}$  in sealed tube (schleck tube which was sealed by a rubber septum). After completion of the reaction, the resulting solution was cooled to room temperature, washed with saturated  $\text{NaCO}_3$  aqueous solution, and extracted with  $\text{CHCl}_3$  three times. The organic layer was dried over anhydrous  $\text{MgSO}_4$ , and concentrated under reduced pressure. The residue was purified by column chromatography on silica gel and eluted with EtOAc/petroleum ether (1/4-1/100) to afford the desired product.

**Caution:** We conducted a scale-up experiment (15 mmol phenylacetylene, 45 mmol  $\text{Et}_3\text{N}$ , 125 mmol  $\text{CH}_2\text{Cl}_2$ ) (the picture is shown below). It is safe under the adopted conditions. However, it is not sure the potential risks for the synthesis of products in larger scales.

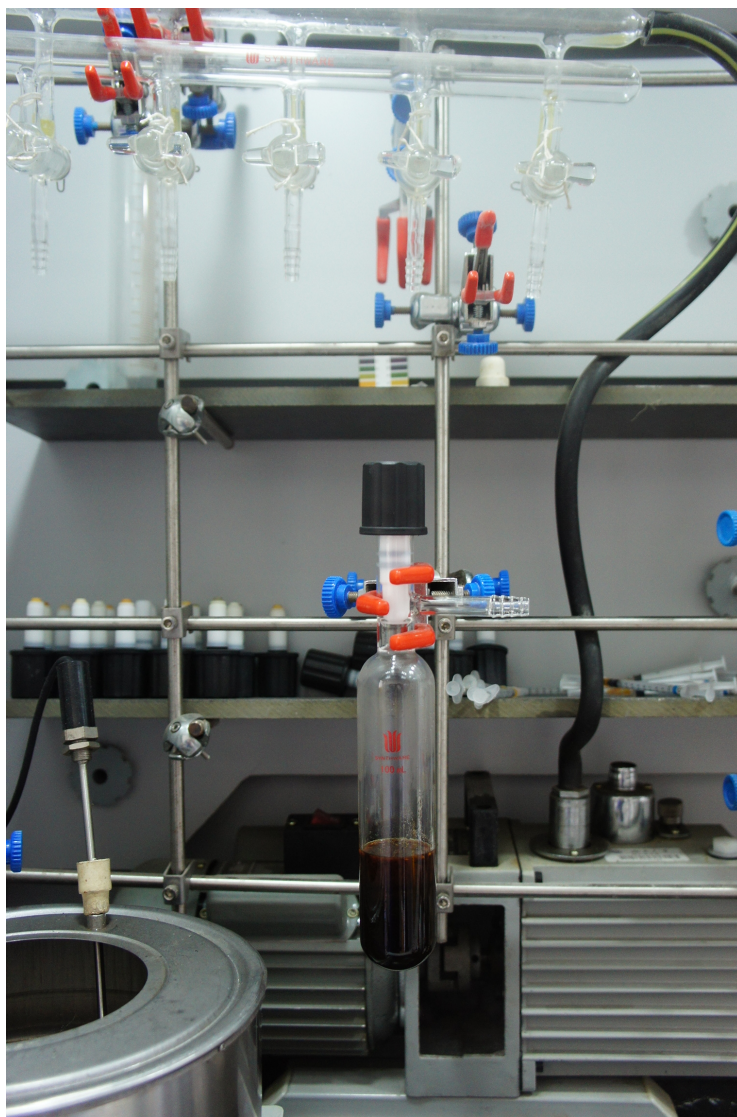

### 3. Optimization of reaction conditions<sup>a</sup>

SI-Table 1. Optimization of the reaction conditions<sup>a</sup>

$\text{Ph}-\text{C}\equiv\text{C}-\text{H} + \text{CH}_2\text{Cl}_2 + \text{Et}_3\text{N} \xrightarrow[\text{dioxane}]{\text{cat (5 mol\%)}} \text{Ph}-\text{C}\equiv\text{C}-\text{CH}_2\text{NEt}_2$

**1a**                      **2a**      120 °C, N<sub>2</sub>, 12 h      **3a**

| Entry          | CH <sub>2</sub> Cl <sub>2</sub> | Et <sub>3</sub> N | Catalyst                                         | Yield <sup>b</sup> (%) |
|----------------|---------------------------------|-------------------|--------------------------------------------------|------------------------|
| 1              | 1                               | 3                 | AgOAc                                            | trace                  |
| 2              | 2                               | 3                 | AgOAc                                            | 10                     |
| 3              | 7                               | 3                 | AgOAc                                            | 38                     |
| 4              | 15                              | 3                 | AgOAc                                            | 98                     |
| 5              | 15                              | 4                 | AgOAc                                            | 98                     |
| 6              | 15                              | 2                 | AgOAc                                            | 67                     |
| 7 <sup>c</sup> | 15                              | 3                 | AgOAc                                            | 40                     |
| 8              | 15                              | 3                 | AgNO <sub>3</sub>                                | 88                     |
| 9              | 15                              | 3                 | Ag <sub>2</sub> CO <sub>3</sub>                  | 80                     |
| 10             | 15                              | 3                 | AgOSO <sub>2</sub> CF <sub>3</sub>               | 80                     |
| 11             | 15                              | 3                 | AgBF <sub>4</sub>                                | 90                     |
| 12             | 15                              | 3                 | AgClO <sub>4</sub>                               | 70                     |
| 13             | 15                              | 3                 | AgOSO <sub>2</sub> C <sub>4</sub> F <sub>9</sub> | 92                     |
| 14             | 15                              | 3                 | AgCl                                             | 85                     |
| 15             | 15                              | 3                 | -                                                | trace                  |

<sup>a</sup> Reaction conditions: phenylacetylene (1.0 mmol), CH<sub>2</sub>Cl<sub>2</sub> (1 mmol-15 mmol), Et<sub>3</sub>N (2 mmol-4 mmol), dioxane (1mL), N<sub>2</sub>, 120 °C, 12 h, sealed tube. <sup>b</sup> Yields were based on phenylacetylene and determined by GC using dodecane as the internal standard.

**SI-Table 2. Effect of catalyst loading<sup>a</sup>**

$\text{Ph}-\text{C}\equiv\text{C}-\text{H} + \text{CH}_2\text{Cl}_2 + \text{Et}_3\text{N} \xrightarrow[\text{dioxane}]{\text{AgOAC}}$   $\text{Ph}-\text{C}\equiv\text{C}-\text{CH}_2\text{NEt}_2$   
 $\text{N}_2, 120\text{ }^\circ\text{C}, 12\text{ h}$

**1a**                      **2a**                      **3a**

| Entry | Catalyst loading (mol%) | Yield <sup>b</sup> (%) |
|-------|-------------------------|------------------------|
| 1     | 1                       | 62                     |
| 2     | 3                       | 90                     |
| 3     | 5                       | 98                     |
| 4     | 7                       | 98                     |
| 5     | 10                      | 97                     |

<sup>a</sup> Reaction conditions: phenylacetylene (1.0 mmol), CH<sub>2</sub>Cl<sub>2</sub> (15 mmol), Et<sub>3</sub>N (3mmol), dioxane (1mL), N<sub>2</sub>, 120 °C, 12 h, sealed tube. <sup>b</sup> Yields were based on phenylacetylene and determined by GC using dodecane as the internal standard.

SI-Table 3. Effect of solvent<sup>a</sup>

$\text{Ph}-\text{C}\equiv\text{C}-\text{H} + \text{CH}_2\text{Cl}_2 + \text{Et}_3\text{N} \xrightarrow[\text{dioxane}]{\text{AgOAc (5 mol\%)}} \text{Ph}-\text{C}\equiv\text{C}-\text{CH}_2\text{NEt}_2$

**1a**                      **2a**                      **3a**

$\text{N}_2, 120\text{ }^\circ\text{C}, 12\text{ h}$

| Entry          | Solvent                                                      | Yield <sup>b</sup> (%) |
|----------------|--------------------------------------------------------------|------------------------|
| 1              | -                                                            | 79                     |
| 2              | DMF                                                          | 87                     |
| 3              | DMSO                                                         | 80                     |
| 4              | THF                                                          | 89                     |
| 5              | CH <sub>3</sub> CN                                           | 43                     |
| 6              | Toluene                                                      | 33                     |
| 7 <sup>c</sup> | Benzene                                                      | 72                     |
| 8              | C <sub>2</sub> H <sub>5</sub> OH                             | 35                     |
| 9              | CH <sub>3</sub> OH                                           | 16                     |
| 10             | CCl <sub>4</sub>                                             | 14                     |
| 11             | C <sub>2</sub> H <sub>5</sub> OC <sub>2</sub> H <sub>5</sub> | 36                     |
| 12             | CH <sub>3</sub> COOC <sub>2</sub> H <sub>5</sub>             | 51                     |
| 13             | CHCl <sub>3</sub>                                            | 71                     |
| 14             | Dioxane                                                      | 98                     |
| 15             | Dioxane (1 mL)+H <sub>2</sub> O (0.1 mL)                     | 50                     |
| 16             | Dioxane (1 mL)-air                                           | trace                  |
| 17             | Dioxane (2 mL)                                               | 97                     |
| 18             | Dioxane (4 mL)                                               | 90                     |

<sup>a</sup> Reaction conditions: phenylacetylene (1.0 mmol), CH<sub>2</sub>Cl<sub>2</sub> (15 mmol), Et<sub>3</sub>N (3 mmol), solvent (1mL), N<sub>2</sub>, 120 °C, 12 h, sealed tube. <sup>b</sup> Yields were based on phenylacetylene and determined by GC using dodecane as the internal standard.

#### 4. <sup>1</sup>H NMR and <sup>13</sup>C NMR data of products

##### *N,N*-Diethyl-3-phenylprop-2-yn-1-amine (**3a**)<sup>1</sup>

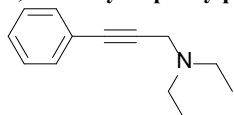

Following the general procedure (EtOAc/petroleum ether 1:4), **3a** was obtained as a pale yellow liquid, isolated yield: 93%. <sup>1</sup>H NMR (CDCl<sub>3</sub>, 400 MHz, TMS): δ 7.41–7.44 (m, 2H), 7.28–7.30 (m, 3H), 3.65 (s, 2H), 2.62 (q, 4H, *J* = 7.2 Hz), 1.12 (t, 6H, *J* = 7.2 Hz); <sup>13</sup>C NMR (100 MHz, CDCl<sub>3</sub>, TMS): δ 131.6, 128.2, 127.8, 123.3, 85.0, 84.4, 47.3, 41.5, 12.6; GC-MS: *m/z*=187.

##### *N,N*-Dipropyl-3-phenylprop-2-yn-1-amine (**3b**)<sup>2</sup>

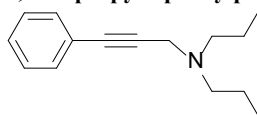

Following the general procedure (EtOAc/petroleum ether 1:6), **3b** was obtained as a faint yellow liquid, isolated yield: 88%. <sup>1</sup>H NMR (CDCl<sub>3</sub>, 400 MHz, TMS): δ 7.42–7.44 (m, 2H), 7.29–7.31 (m, 3H), 3.63 (s, 2H), 2.51 (t, 4H, *J* = 6.0 Hz), 1.49–1.58 (m, 4H), 0.93 (t, 6H, *J* = 7.2 Hz); <sup>13</sup>C NMR (100 MHz, CDCl<sub>3</sub>, TMS): δ 131.7, 128.2, 127.9, 123.3, 85.0, 84.5, 55.8, 42.7, 20.6, 11.9; GC-MS: *m/z*=215.

##### *N,N*-Diallyl-3-phenylprop-2-yn-1-amine (**3c**)

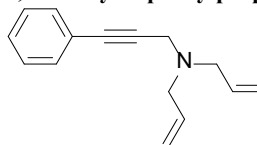

Following the general procedure (EtOAc/petroleum ether 1:4), **3c** was obtained as a colorless liquid, isolated yield: 86%. <sup>1</sup>H NMR (CDCl<sub>3</sub>, 400 MHz, TMS): δ 7.43–7.46 (m, 2H), 7.28–7.31 (m, 3H), 5.83–5.92 (m, 2H), 5.29 (q, 1H, *J* = 1.2 Hz), 5.25 (q, 1H, *J* = 1.2 Hz), 5.19 (t, 1H, *J* = 1.0 Hz), 5.17 (t, 1H, *J* = 1.0 Hz), 3.60 (s, 2H), 3.19 (d, 4H, *J* = 2.4 Hz); <sup>13</sup>C NMR (100 MHz, CDCl<sub>3</sub>, TMS): δ 135.3, 131.7, 128.2, 127.9, 123.3, 118.2, 85.3, 84.2, 56.5, 42.1. HRMS (EI): calcd for C<sub>15</sub>H<sub>17</sub>N: 211.1361, found: 211.1378.

##### *N,N*-Dibutyl-3-phenylprop-2-yn-1-amine (**3d**)<sup>2</sup>

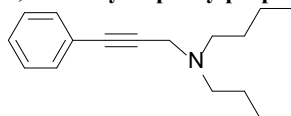

Following the general procedure (EtOAc/petroleum ether 1:6), **3d** was obtained as a faint yellow liquid, isolated yield: 85%. <sup>1</sup>H NMR (CDCl<sub>3</sub>, 400 MHz, TMS): δ 7.41–7.43 (m, 2H), 7.28–7.30 (m, 3H), 3.61 (s, 2H), 2.53 (q, 4H, *J* = 6.0 Hz), 1.45–1.50 (m, 4H), 1.32–1.38 (m, 4H), 0.93 (t, 6H, *J* = 7.2 Hz); <sup>13</sup>C NMR (100 MHz, CDCl<sub>3</sub>, TMS): δ 131.6, 128.1, 127.8, 123.4, 84.9, 84.7, 53.6, 42.6, 29.7, 20.7, 14.0; GC-MS: *m/z*=243.

##### *N,N*-Dioctyl-3-phenylprop-2-yn-1-amine (**3e**)<sup>2</sup>

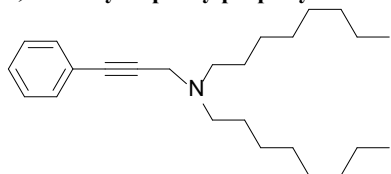

Following the general procedure (EtOAc/petroleum ether 1:100), **3e** was obtained as a colorless liquid, isolated yield: 70%. <sup>1</sup>H NMR (CDCl<sub>3</sub>, 400 MHz, TMS): δ 7.42–7.45 (m, 2H), 7.28–7.31 (m, 3H), 3.72 (s, 2H), 2.61–2.68 (m, 4H), 1.58 (s, 4H), 1.26–1.32 (m, 20H), 0.88 (t, 6H, *J* = 6.8 Hz); <sup>13</sup>C NMR (100 MHz, CDCl<sub>3</sub>, TMS): δ 131.7, 128.2, 128.2, 128.0, 85.0, 84.7, 53.9, 43.2, 31.8, 29.4, 29.2, 27.4, 26.9, 22.6, 14.1; GC-MS: *m/z*=355.

##### *N*-Cyclohexan-*N*-methyl-3-phenylprop-2-yn-1-amine (**3f**)<sup>4</sup>

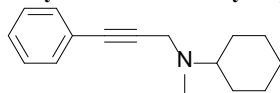

Following the general procedure (EtOAc/petroleum ether 1:4), **3f** was obtained as a colorless liquid, isolated yield: 89%. <sup>1</sup>H NMR (CDCl<sub>3</sub>, 400 MHz, TMS): δ 7.42–7.44 (m, 2H), 7.28–7.31 (m, 3H), 3.65 (s, 2H), 2.45–2.48 (m, 1H), 2.43 (s, 3H), 1.96 (d, 2H, *J* = 10.4 Hz), 1.80 (d, 2H, *J* = 2.0 Hz), 1.78 (d, 1H, *J* = 2.4 Hz), 1.23 (d, 4H, *J* = 1.2 Hz), 1.17–1.20 (m, 1H); <sup>13</sup>C NMR (100 MHz, CDCl<sub>3</sub>, TMS): δ 131.6, 128.2, 127.9, 123.3, 85.4, 84.9, 61.1, 43.7, 38.5, 29.7, 26.0, 25.5; GC-MS: *m/z*=227.

##### 1-(3-phenylprop-2-yn-1-yl)piperidine (**3g**)<sup>2</sup>

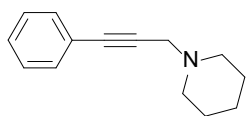

Following the general procedure (EtOAc/petroleum ether 1:4), **3g** was obtained as a colorless liquid, isolated yield: 87%. <sup>1</sup>H NMR (CDCl<sub>3</sub>, 400 MHz, TMS): δ 7.42–7.45 (m, 2H), 7.27–7.30 (m, 3H), 3.48 (s, 2H), 2.57 (s, 4H), 1.61–1.67 (m, 4H), 1.44 (s, 2H); <sup>13</sup>C NMR (100 MHz, CDCl<sub>3</sub>, TMS): δ 131.6, 128.1, 127.9, 123.1, 85.0, 84.8, 53.3, 48.3, 25.8, 23.8; GC-MS: m/z=198.

#### 4-(3-phenylprop-2-yn-1-yl)morpholine (**3h**)<sup>2</sup>

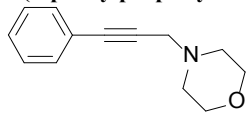

Following the general procedure (EtOAc/petroleum ether 1:1), **3h** was obtained as a colorless liquid, isolate yield: 88%. <sup>1</sup>H NMR (CDCl<sub>3</sub>, 400 MHz, TMS): δ 7.43–7.45 (m, 2H), 7.29–7.32 (m, 3H), 3.78 (t, 4H, *J* = 4.6 Hz), 3.52 (s, 2H), 2.66 (t, 4H, *J* = 4.6Hz); <sup>13</sup>C NMR (100 MHz, CDCl<sub>3</sub>, TMS): δ 131.7, 128.3, 128.2, 122.9, 85.6, 83.9, 66.8, 52.4, 48.1; GC-MS: m/z=201.

#### *N,N*-Dicyclohexan-*N*-methyl-3-phenylprop-2-yn-1-amine (**3i**)

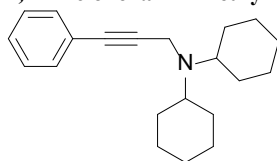

Following the general procedure (EtOAc/petroleum ether 1:10), **3i** was obtained as a colorless liquid, isolated yield: 95%. <sup>1</sup>H NMR (CDCl<sub>3</sub>, 400 MHz, TMS): δ 7.39–7.42 (m, 2H), 7.30–7.32(m, 3H), 3.89 (s, 2H), 3.09 (t, 2H, *J* = 11.4Hz), 2.02 (d, 4H, *J* = 11.2Hz), 1.84 (d, 4H, *J* = 13.2Hz), 1.51–1.66 (m, 6H), 1.15–1.33 (m, 6H); <sup>13</sup>C NMR (100 MHz, CDCl<sub>3</sub>, TMS): δ 131.4, 128.2, 122.7, 85.6, 85.1, 58.4, 35.6, 29.8, 25.8, 25.7; HRMS (EI): calcd for C<sub>21</sub>H<sub>29</sub>N: 295.2300, found: 295.2306.

#### *N,N*-diethyl-3-(*p*-tolyl)prop-2-yn-1-amine (**3j**)<sup>1</sup>

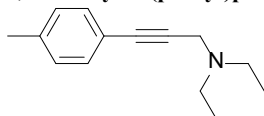

Following the general procedure (EtOAc/petroleum ether 1:4), **3j** was obtained as a faint yellow liquid, isolated yield: 88%. <sup>1</sup>H NMR (400 MHz, CDCl<sub>3</sub>, TMS ): δ 7.31 (d, 2H, *J* = 8.0 Hz) Ar-H), 7.09 (d, 2H, *J* = 8.0 Hz), 3.63 (s, 2H), 2.63 (q, 4H, *J* = 7.2 Hz), 2.33 (s, 3H), 1.11 (t, 6H, *J* = 7.2 Hz); <sup>13</sup>C NMR (100 MHz, CDCl<sub>3</sub>, TMS ): δ 137.9, 131.5, 128.9, 120.2, 85.0, 83.4, 47.2, 41.4, 21.4, 12.6; GC-MS: m/z=201.

#### 3-(4-(*tert*-butyl)phenyl)-*N,N*-diethylprop-2-yn-1-amine (**3k**)<sup>6</sup>

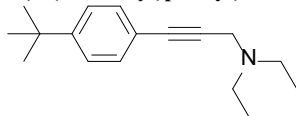

Following the general procedure (EtOAc/petroleum ether 1:4), **3k** was obtained as a colorless liquid, isolated yield: 89%. <sup>1</sup>H NMR (400 MHz, CDCl<sub>3</sub>, TMS): δ 7.35 (d, 2H, *J* = 8.4 Hz), 7.30 (d, 2H, *J* = 8.4 Hz), 3.63 (s, 2H), 2.61 (q, 4H, *J* = 7.2 Hz), 1.30 (s, 9H), 1.11 (t, 6H, *J* = 7.2 Hz); <sup>13</sup>C NMR (100 MHz, CDCl<sub>3</sub>, TMS): δ 151.1, 131.4, 125.2, 120.4, 85.0, 83.6, 47.3, 41.45, 34.7, 31.2, 12.7; GC-MS: m/z=243.

#### *N,N*-diethyl-3-(4-pentylphenyl)prop-2-yn-1-amine (**3l**)

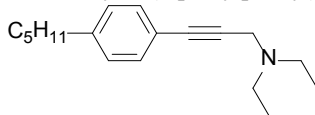

Following the general procedure (EtOAc/petroleum ether 1:5), **3l** was obtained as a faint yellow liquid, isolate yield: 89%. <sup>1</sup>H NMR (400 MHz, CDCl<sub>3</sub>, TMS): δ 7.32 (d, 2H, *J* = 8.0 Hz), 7.09 (d, 2H, *J* = 8.0 Hz), 3.64 (s, 2H), 2.63 (q, 2H, *J* = 7.2 Hz), 2.57 (d, 4H, *J* = 8.0 Hz), 1.55–1.63 (m, 2H), 1.27–1.32 (m, 4H), 1.11 (t, 6H, *J* = 7.2 Hz), 0.88 (t, 3H, *J* = 7.2 Hz); <sup>13</sup>C NMR (100 MHz, CDCl<sub>3</sub>, TMS): δ 143.0, 131.5, 128.3, 120.4, 85.1, 83.3, 47.2, 41.3, 35.8, 31.4, 30.9, 22.5, 14.0, 12.5; HRMS (EI): calcd for C<sub>18</sub>H<sub>27</sub>N: 257.2143, found: 257.2122.

#### *N,N*-diethyl-3-(4-methoxyphenyl)prop-2-yn-1-amine (**3m**)<sup>1</sup>

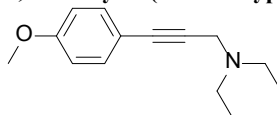

Following the general procedure (EtOAc/petroleum ether 1:4), **3m** was obtained as a white liquid, isolated yield: 90%. <sup>1</sup>H NMR (400 MHz, CDCl<sub>3</sub>, TMS ): δ 7.34 (d, 2H, *J* = 8.8 Hz), 6.80 (d, 2H, *J* =

8.8 Hz), 3.79 (s, 3H), 3.62 (s, 2H), 2.60 (q, 4H,  $J = 7.2$  Hz), 1.11 (t, 6H,  $J = 7.2$  Hz);  $^{13}\text{C}$  NMR (100 MHz,  $\text{CDCl}_3$ , TMS):  $\delta$  159.3, 133.1, 115.5, 113.8, 84.7, 82.7, 55.3, 47.3, 41.5, 12.6; GC-MS:  $m/z=217$ .

### 3-(4-bromophenyl)-*N,N*-diethylprop-2-yn-1-amine (3n)

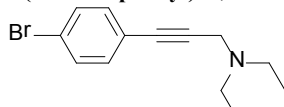

Following the general procedure (EtOAc/petroleum ether 1:4), **3n** was obtained as a faint yellow liquid, isolate yield: 92%.  $^1\text{H}$  NMR (400 MHz,  $\text{CDCl}_3$ , TMS):  $\delta$  7.40 (d, 2H,  $J = 6.8$  Hz), 7.26 (d, 2H,  $J = 6.8$  Hz), 3.61 (s, 2H), 2.62 (q, 4H,  $J = 7.2$  Hz), 1.11 (t, 6H,  $J = 7.2$  Hz);  $^{13}\text{C}$  NMR (100 MHz,  $\text{CDCl}_3$ , TMS):  $\delta$  133.2, 131.5, 122.3, 122.1, 85.8, 83.9, 47.3, 41.5, 12.6; GC-MS:  $m/z=265$ ; HRMS (EI): calcd for  $\text{C}_{18}\text{H}_{27}\text{N}$ : 265.0466, found: 265.0453.

### 3-(4-chlorophenyl)-*N,N*-diethylprop-2-yn-1-amine (3o)<sup>1</sup>

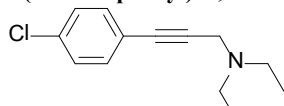

Following the general procedure (EtOAc/petroleum ether 1:4), **3o** was obtained as a faint yellow liquid, isolated yield: 90%.  $^1\text{H}$  NMR (400 MHz,  $\text{CDCl}_3$ , TMS):  $\delta$  7.28 (d, 2H,  $J = 8.4$  Hz), 7.18 (d, 2H,  $J = 8.4$  Hz), 3.56 (s, 2H), 2.56 (q, 4H,  $J = 7.2$  Hz), 1.04 (t, 6H,  $J = 7.2$  Hz);  $^{13}\text{C}$  NMR (100 MHz,  $\text{CDCl}_3$ , TMS):  $\delta$  133.9, 132.9, 128.6, 121.8, 85.4, 83.9, 47.3, 41.4, 12.5; GC-MS:  $m/z=221$ .

### *N,N*-diethyl-3-(4-fluorophenyl)prop-2-yn-1-amine (3p)<sup>4</sup>

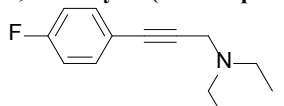

Following the general procedure (EtOAc/petroleum ether 1:4), **3p** was obtained as a faint yellow liquid, isolate yield: 89%.  $^1\text{H}$  NMR (400 MHz,  $\text{CDCl}_3$ , TMS):  $\delta$  7.38–7.41 (m, 2H), 6.96–7.00 (m, 2H), 3.62 (s, 2H), 2.62 (q, 4H,  $J = 7.2$  Hz), 1.11 (t, 6H,  $J = 7.2$  Hz);  $^{13}\text{C}$  NMR (100 MHz,  $\text{CDCl}_3$ , TMS):  $\delta$  161.0, 133.5, 133.4, 115.5, 115.3, 83.9, 47.2, 41.3, 12.5; GC-MS:  $m/z=205$ .

### *N,N*-diethyl-3-(4-(trifluoromethyl)phenyl)prop-2-yn-1-amine (3q)<sup>4</sup>

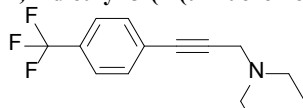

Following the general procedure (EtOAc/petroleum ether 1:4), **3q** was obtained as white liquid, isolated yield: 91%.  $^1\text{H}$  NMR (400 MHz,  $\text{CDCl}_3$ , TMS):  $\delta$  7.54 (d, 2H,  $J = 8.4$  Hz), 7.50 (d, 2H,  $J = 8.4$  Hz), 3.64 (s, 2H), 2.62 (q, 4H,  $J = 7.2$  Hz), 1.12 (t, 6H,  $J = 7.2$  Hz);  $^{13}\text{C}$  NMR (100 MHz,  $\text{CDCl}_3$ , TMS):  $\delta$  131.9, 129.5, 127.2, 125.2 (q,  $J = 3.7$  Hz), 122.6, 87.3, 47.3, 41.4, 12.6; GC-MS:  $m/z=255$ .

### *N,N*-diethyl-3-(4-nitrophenyl)prop-2-yn-1-amine (3r)

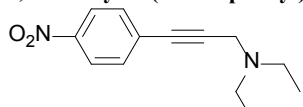

Following the general procedure (EtOAc/petroleum ether 1:4), **3r** was obtained as a colorless liquid, isolate yield: 92%.  $^1\text{H}$  NMR (400 MHz,  $\text{CDCl}_3$ , TMS):  $\delta$  7.28 (d, 2H,  $J = 8.4$  Hz), 6.96 (d, 2H,  $J = 8.4$  Hz), 3.67 (s, 2H), 2.62 (q, 4H,  $J = 7.2$  Hz), 1.12 (t, 6H,  $J = 7.2$  Hz);  $^{13}\text{C}$  NMR (100 MHz,  $\text{CDCl}_3$ ):  $\delta$  146.9, 132.4, 130.3, 123.5, 90.8, 83.4, 47.4, 41.6, 12.6. HRMS (EI): calcd for  $\text{C}_{13}\text{H}_{18}\text{N}_2\text{O}_2$ : 232.1212, found: 232.1201

### 4-(3-(diethylamino)prop-1-yn-1-yl)benzonitrile (3s)<sup>1</sup>

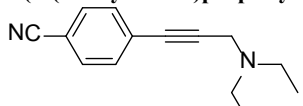

Following the general procedure (EtOAc/petroleum ether 1:4), **3s** was obtained as a colorless yellow liquid, isolated yield: 90%.  $^1\text{H}$  NMR (400 MHz,  $\text{CDCl}_3$ , TMS):  $\delta$  7.54 (d, 2H,  $J = 8.0$  Hz), 7.45 (d, 2H,  $J = 8.0$  Hz), 3.63 (s, 2H), 2.58 (q, 4H,  $J = 7.2$  Hz), 1.08 (t, 6H,  $J = 7.2$  Hz);  $^{13}\text{C}$  NMR (100 MHz,  $\text{CDCl}_3$ ):  $\delta$  132.2, 131.9, 128.3, 118.5, 111.3, 89.6, 83.6, 47.4, 41.5, 12.6; GC-MS:  $m/z=212$ .

### 3,3'-(1,4-phenylene)bis(*N,N*-diethylprop-2-yn-1-amine) (3t)



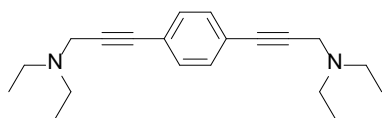

Following the general procedure (EtOAc/Petroleum ether 1:2), **3t** was obtained as a colorless liquid, isolated yield: 88%.  $^1\text{H NMR}$  (400 MHz,  $\text{CDCl}_3$ , TMS):  $\delta$  7.35 (s, 4H), 3.66 (s, 4H), 2.62 (q, 8H,  $J = 7.2$  Hz), 1.12 (t, 12H,  $J = 7.2$  Hz);  $^{13}\text{C NMR}$  (100 MHz,  $\text{CDCl}_3$ , TMS):  $\delta$  131.5, 122.8, 85.9, 84.8, 47.3, 41.4, 12.6; GC-MS:  $m/z=296$ .

#### 7-(diethylamino)hept-5-yn-1-ol (**3u**)

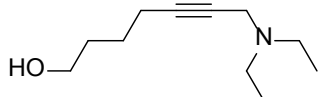

Following the general procedure, **3u** was obtained as a colorless liquid, isolated yield: 87%.  $^1\text{H NMR}$  (400 MHz,  $\text{CDCl}_3$ , TMS):  $\delta$  3.59 (t, 2H,  $J = 6.8$  Hz), 3.54 (s, 2H), 2.50 (q, 4H,  $J = 7.2$  Hz), 2.14 (t, 2H,  $J = 7.2$  Hz), 1.51-1.58 (m, 4H), 1.01 (t, 6H,  $J = 7.2$  Hz);  $^{13}\text{C NMR}$  (100 MHz,  $\text{CDCl}_3$ ):  $\delta$  85.6, 84.3, 61.8, 46.9, 40.6, 31.6, 25.1, 18.4, 11.8. HRMS (EI): calcd for  $\text{C}_{11}\text{H}_{21}\text{NO}$ : 183.1623, found: 183.1617.

#### 4-(diethylamino)-1-phenylbut-2-yn-1-ol (**3v**)

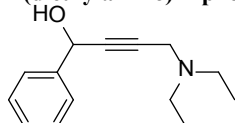

Following the general procedure, **3v** was obtained as a colorless liquid, isolated yield: 89%.  $^1\text{H NMR}$  (400 MHz,  $\text{CDCl}_3$ , TMS):  $\delta$  7.50 (d, 2H,  $J = 7.6$  Hz), 7.34 (t, 2H,  $J = 7.2$  Hz), 7.28 (d, 1H,  $J = 8.0$  Hz), 5.44 (s, 1H), 3.44 (s, 2H), 2.55 (q, 4H,  $J = 7.2$  Hz), 1.05 (t, 6H,  $J = 7.2$  Hz);  $^{13}\text{C NMR}$  (100 MHz,  $\text{CDCl}_3$ ):  $\delta$  141.4, 128.4, 127.9, 126.6, 86.0, 79.9, 63.9, 47.0, 11.8. HRMS (EI): calcd for  $\text{C}_{14}\text{H}_{17}\text{NO}$ : 217.1467, found: 217.1443.

#### 1-(3-(diethylamino)prop-1-yn-1-yl)cyclopentanol (**3w**)

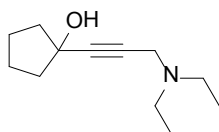

Following the general procedure, **3w** was obtained as a colorless liquid, isolated yield: 80%.  $^1\text{H NMR}$  (400 MHz,  $\text{CDCl}_3$ , TMS):  $\delta$  3.44 (s, 2H), 2.57 (s, 1H), 2.54 (q, 4H,  $J = 7.2$  Hz), 1.91-1.95 (m, 4H), 1.81-1.83 (m, 2H), 1.72-1.81 (m, 2H), 1.07 (t, 6H,  $J = 7.2$  Hz);  $^{13}\text{C NMR}$  (100 MHz,  $\text{CDCl}_3$ , TMS):  $\delta$  89.2, 77.0, 74.1, 47.0, 42.5, 40.7, 23.3, 12.2. HRMS (EI): calcd for:  $\text{C}_{12}\text{H}_{21}\text{NO}$ : 195.16, found: 195.1615.

#### 4-(diethylamino)but-2-yn-1-yl benzoate (**3x**)

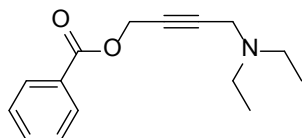

Following the general procedure (EtOAc/petroleum ether 1:4), **3x** was obtained as a colorless liquid, isolated yield: 91%.  $^1\text{H NMR}$  ( $\text{CDCl}_3$ , 400 MHz, TMS):  $\delta$  8.04 (d, 2H,  $J = 8.0$  Hz), 7.53 (t, 1H,  $J = 7.2$  Hz), 7.41 (t, 2H,  $J = 7.6$  Hz), 4.92 (s, 2H), 3.45 (s, 2H), 2.53 (q, 4H,  $J = 7.2$  Hz), 1.04 (t, 6H,  $J = 7.2$  Hz);  $^{13}\text{C NMR}$  (100 MHz,  $\text{CDCl}_3$ , TMS):  $\delta$  165.9, 133.2, 129.7, 129.6, 128.4, 81.9, 78.8, 52.9, 47.2, 40.9, 12.4. HRMS (EI): calcd for:  $\text{C}_{15}\text{H}_{19}\text{NO}_2$ : 245.1416, found: 245.1421.

#### *N,N*-diethyl-3-(trimethylsilyl)prop-2-yn-1-amine (**3y**)<sup>6</sup>

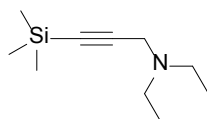

Following the general procedure (EtOAc/Petroleum ether 1:4), **3y** was obtained as a colorless liquid, isolated yield: 82%.  $^1\text{H NMR}$  (400 MHz,  $\text{CDCl}_3$ , TMS):  $\delta$  3.42 (s, 2H), 2.55 (q, 4H,  $J = 7.2$  Hz), 1.07 (t, 6H,  $J = 7.2$  Hz), 0.16 (s, 9H);  $^{13}\text{C NMR}$  (100 MHz,  $\text{CDCl}_3$ , TMS):  $\delta$  100.8, 89.4, 47.1, 41.6, 12.5, 0.05; GC-MS:  $m/z=183$

#### *N,N*-diethyldodec-2-yn-1-amine (**3z**)<sup>5</sup>

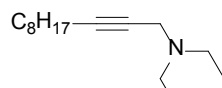

Following the general procedure (EtOAc/Petroleum ether 1:4), **3z** was obtained as a colorless liquid, isolated yield: 83%. <sup>1</sup>H NMR (400 MHz, CDCl<sub>3</sub>, TMS): δ 3.47 (s, 2H), 2.64 (q, 4H, *J* = 7.0 Hz), 2.18-2.21 (m, 2H), 1.25-1.50 (m, 12H), 1.13 (t, 6H, *J* = 7.0 Hz), 0.88 (t, 3H, *J* = 6.8 Hz); <sup>13</sup>C NMR (100 MHz, CDCl<sub>3</sub>, TMS): δ 47.2, 40.6, 31.8, 29.7, 29.2, 29.0, 28.8, 28.8, 22.6, 18.7, 14.1, 11.9; GC-MS: *m/z*=224.

#### *N,N*-diethyl-3-(pyridin-2-yl)prop-2-yn-1-amine (**3z<sub>1</sub>**)<sup>7</sup>

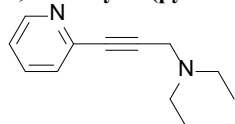

Following the general procedure (EtOAc/Petroleum ether 1:4), **3z<sub>1</sub>** was obtained as a faint yellow liquid, isolated yield: 88%. <sup>1</sup>H NMR (400 MHz, CDCl<sub>3</sub>, TMS): δ 8.56 (d, 1H, *J* = 7.2 Hz), 7.61-7.65 (m, 1H), 7.22-7.42 (m, 1H), 7.20-7.22 (m, 1H), 3.70 (s, 2H), 2.65 (q, 4H, *J* = 7.2 Hz), 1.12 (t, 6H, *J* = 7.2 Hz); <sup>13</sup>C NMR (100 MHz, CDCl<sub>3</sub>, TMS): δ 149.8, 143.2, 136.0, 127.1, 122.6, 84.6, 84.6, 47.3, 41.2, 12.6; GC-MS: *m/z*=188.

#### *N,N*-diethyl-3-(thiophen-2-yl)prop-2-yn-1-amine (**3z<sub>2</sub>**)<sup>10</sup>

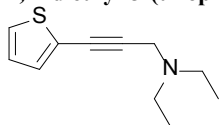

Following the general procedure (EtOAc/Petroleum ether 1:4), **3z<sub>2</sub>** was obtained as a faint yellow liquid, isolated yield: 87%. <sup>1</sup>H NMR (400 MHz, CDCl<sub>3</sub>, TMS): δ 7.19-7.21 (m, 1H), 7.16-7.17 (m, 1H), 6.94-6.96 (m, 1H), 3.66 (s, 2H), 2.62 (q, 4H, *J* = 7.2 Hz), 1.11 (t, 6H, *J* = 7.2 Hz); <sup>13</sup>C NMR (100 MHz, CDCl<sub>3</sub>, TMS): δ 131.5, 126.7, 126.4, 123.2, 88.5, 78.0, 47.3, 41.6, 12.6; GC-MS: *m/z*=193.

#### *N*-methyl-*N*-(3-phenylprop-2-yn-1-yl)cyclohexanamine (**3z<sub>3</sub>**)<sup>4</sup>

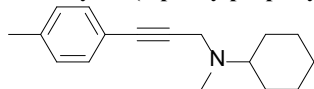

Following the general procedure (EtOAc/Petroleum ether 1:4), **3z<sub>3</sub>** was obtained as a faint yellow liquid, isolated yield: 92%. <sup>1</sup>H NMR (400 MHz, CDCl<sub>3</sub>, TMS): δ 7.30-7.32 (d, 2H, *J* = 8.0 Hz), 7.10 (d, 2H, *J* = 8.0 Hz), 3.62 (s, 2H), 2.44-2.47 (m, 1H), 2.42 (s, 3H), 2.33 (s, 3H), 1.96 (t, *J* = 5.6 Hz, 2H), 1.79 (t, *J* = 6.0 Hz, 2H), 1.60 (q, *J* = 9.6 Hz, 1H), 1.15-1.28 (m, 4H), 1.09-1.16 (m, 1H); <sup>13</sup>C NMR (100 MHz, CDCl<sub>3</sub>, TMS): δ 137.9, 131.5, 128.9, 120.3, 84.9, 84.6, 61.0, 43.7, 38.4, 29.7, 26.0, 25.5, 21.4; GC-MS: *m/z*=242.

#### 1-(4-(3-(diethylamino)prop-1-yn-1-yl)phenyl)ethanone (**3z<sub>4</sub>**)<sup>11</sup>

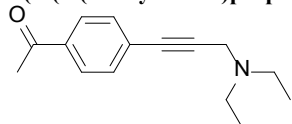

Following the general procedure (EtOAc/petroleum ether 1:4), **3z<sub>4</sub>** was obtained as a faint yellow liquid, isolated yield: 91%. <sup>1</sup>H NMR (400 MHz, CDCl<sub>3</sub>, TMS): δ 7.86 (d, 2H, *J* = 8.4 Hz), 7.47 (d, 2H, *J* = 8.4 Hz), 3.65 (s, 2H), 2.60 (q, 4H, *J* = 7.2 Hz), 2.57 (s, 3H), 1.11 (t, 6H, *J* = 7.2 Hz); <sup>13</sup>C NMR (100 MHz, CDCl<sub>3</sub>, TMS): δ 197.3, 136.0, 131.8, 128.2, 88.4, 84.3, 47.4, 41.6, 26.6, 12.6; GC-MS: *m/z*=229.

#### 1-(4-(3-(dipropylamino)prop-1-yn-1-yl)phenyl)ethanone (**3z<sub>5</sub>**)

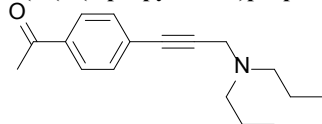

Following the general procedure (EtOAc/petroleum ether 1:4), **3z<sub>5</sub>** was obtained as a faint yellow liquid, isolated yield: 90%. <sup>1</sup>H NMR (400 MHz, CDCl<sub>3</sub>, TMS): δ 7.86 (d, 2H, *J* = 8.4 Hz), 7.47 (d, 2H, *J* = 8.4 Hz), 3.62 (s, 2H), 2.57 (s, 3H), 2.48 (t, 4H, *J* = 7.6 Hz), 1.46-1.53 (m, 4H), 0.90 (t, 6H, *J* = 7.0 Hz); <sup>13</sup>C NMR (100 MHz, CDCl<sub>3</sub>, TMS): δ 197.3, 136.0, 131.8, 128.4, 128.2, 88.7, 84.3, 55.9, 42.8, 26.6, 20.7, 11.9; HRMS (EI): calcd for C<sub>18</sub>H<sub>27</sub>N: 257.1780, found: 257.1762.

#### *N,N*-Diethyl-3-phenyl-2-deuteriopropyn-1-amine (**3a-d**)<sup>1</sup>

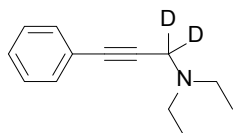

Following the general procedure (EtOAc/petroleum ether 1:4), **3a-d** was obtained as a colorless liquid, isolate yield: 90%.  $^1\text{H}$  NMR ( $\text{CDCl}_3$ , 400 MHz, TMS):  $\delta$  7.41–7.43 (m, 2H), 7.27–7.28 (m, 3H), 2.62 (q, 4H,  $J = 7.2$  Hz), 1.11 (t, 6H,  $J = 7.2$  Hz);  $^{13}\text{C}$  NMR (100 MHz,  $\text{CDCl}_3$ , TMS):  $\delta$  131.6, 128.2, 127.8, 123.3, 85.0, 84.4, 47.3, 41.5, 12.6; GC-MS:  $m/z=189$ .

#### ***N*-(chloromethyl)-*N,N*-diethylethanaminium chloride (**4a<sub>1</sub>**)<sup>5</sup>**

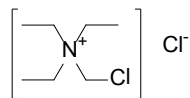

The product was prepared according to the following procedure: dichloromethane and triethylamine were dissolved in DMF under  $\text{N}_2$  atmospheres, stirred at 80 °C for 12 h. The mixture was allowed to cool to room temperature, washed with diethyl ether and dried under reduced pressure to give a colorless solid, isolated yield: 85%  $^1\text{H}$  NMR (400 MHz,  $\text{D}_2\text{O}$ ):  $\delta$  4.36 (s, 2H), 3.07 (q, 4H,  $J = 7.2$  Hz), 2.83 (q, 2H,  $J = 7.2$  Hz), 0.97 (t, 6H,  $J = 7.2$  Hz), 0.92 (t, 3H,  $J = 7.2$  Hz).

## **5. References**

1. D.Y. Yu, and Y.G. Zhang, *Adv. Synth. Catal.*, 2011, **353**, 163.
2. M. Rahman, A. K. Bagdi, A. Majee and A. Hajra, *Tetrahedron Lett.*, 2011, **52**, 4437.
3. M. Niu, Z. Yin, H. Fu, Y. Jiang and Y. Zhao, *J. Org. Chem.*, 2008, **73**, 3961.
4. X. L. Xu and X. N. Li, *Org. Lett.*, 2009, **11**, 1027.
5. Y. C. Tang, T. B. Xiao and L. Zhou, *Tetrahedron Lett.*, 2012, **53**, 6199.
6. L. W. Bieber, F. Margarete and D. Silva, *Tetrahedron Lett.*, 2004, **45**, 8281.
7. O. Russo, S. Messaoudi, A. Hamze and N. Olivi, *Tetrahedron*, 2007, **63**, 10671.
8. W. Ried and K. Wesselborg, *Justus Liebigs Annalen der Chemie*, 1960, **635**, 97.
9. S. G. Kuznetsov, N. M. Libman and V. A. Volkova, *Zhurnal Organicheskoi Khimii*, 1970, **6**, 442.
10. J. Yang, P. H. Li and L. Wang, *Catal. Commun.*, 2012, **27**, 58.
11. X. L. Xu and X. N. Li, *J. Org. Chem.*, 2009, **11**, 1027.

## 6. Copies of $^1\text{H}$ and $^{13}\text{C}$ NMR spectra

### $^1\text{H}$ NMR and $^{13}\text{C}$ NMR of **3a**

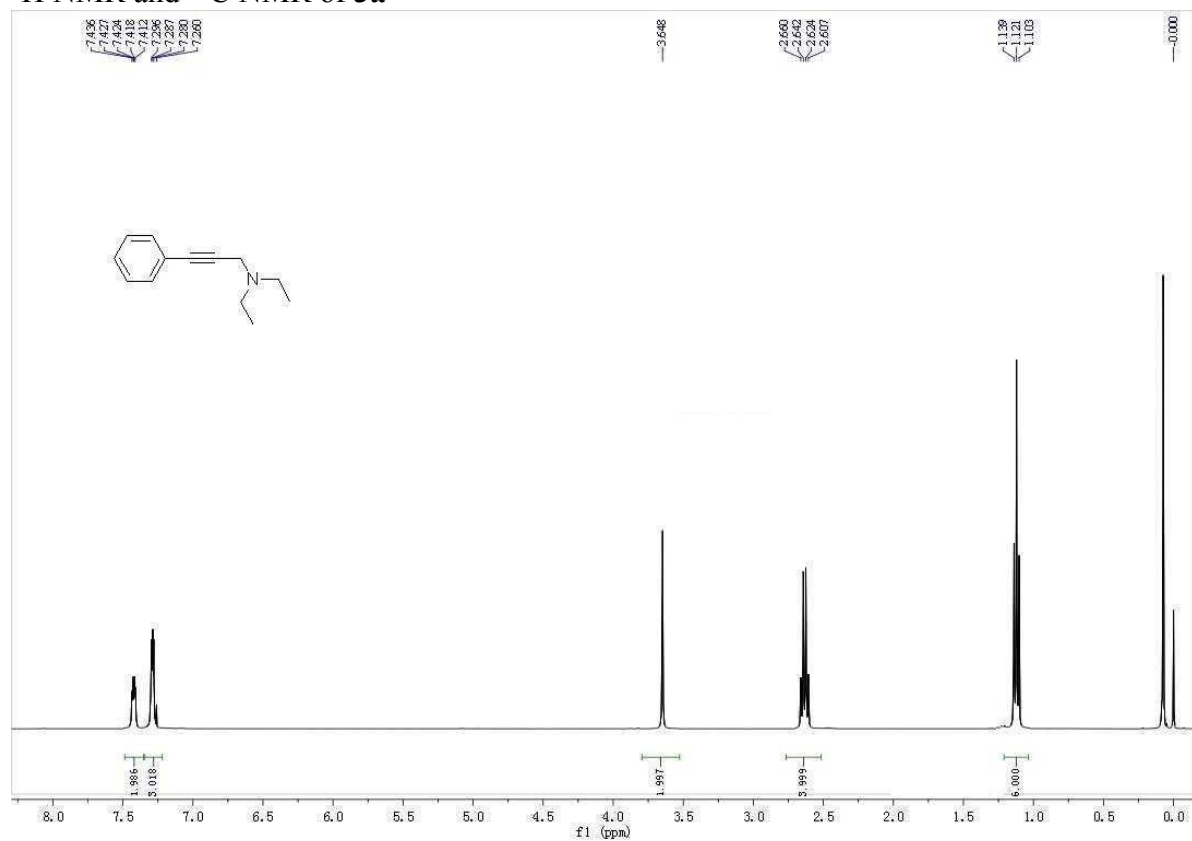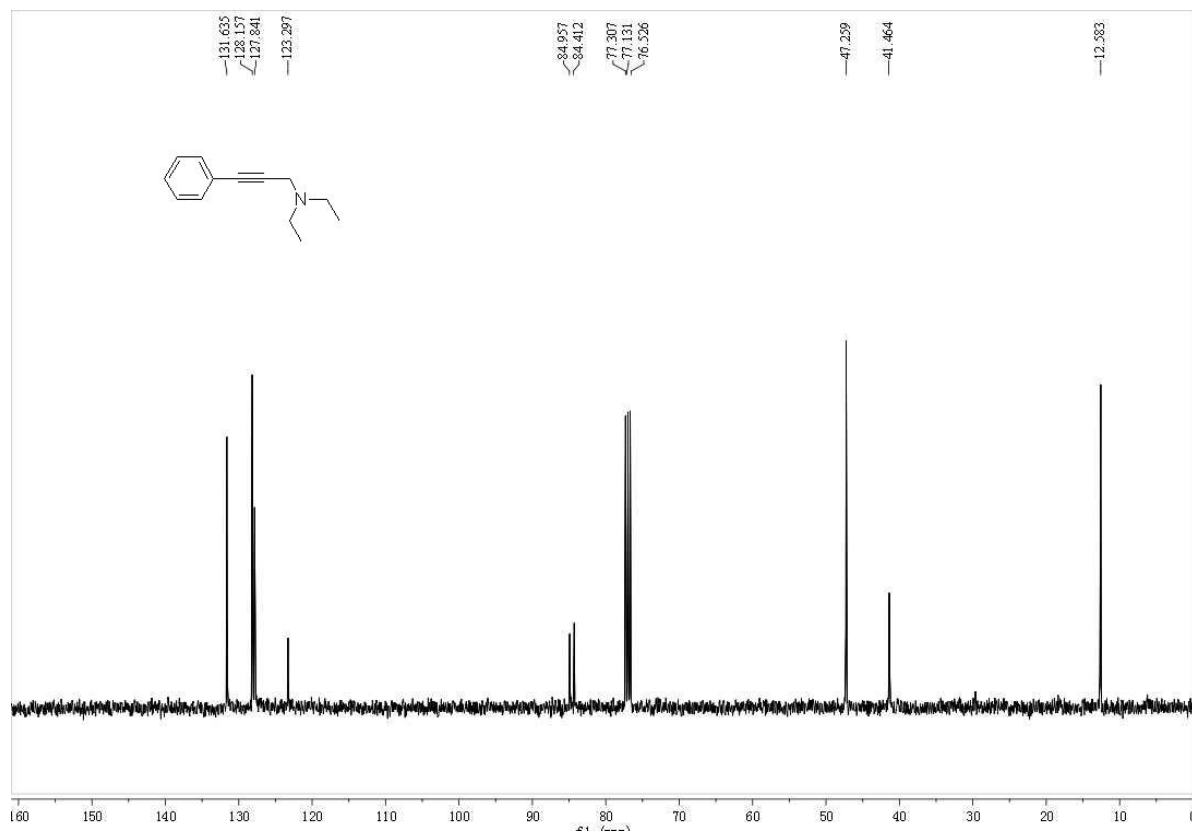

### $^1\text{H}$ NMR and $^{13}\text{C}$ NMR of **3b**

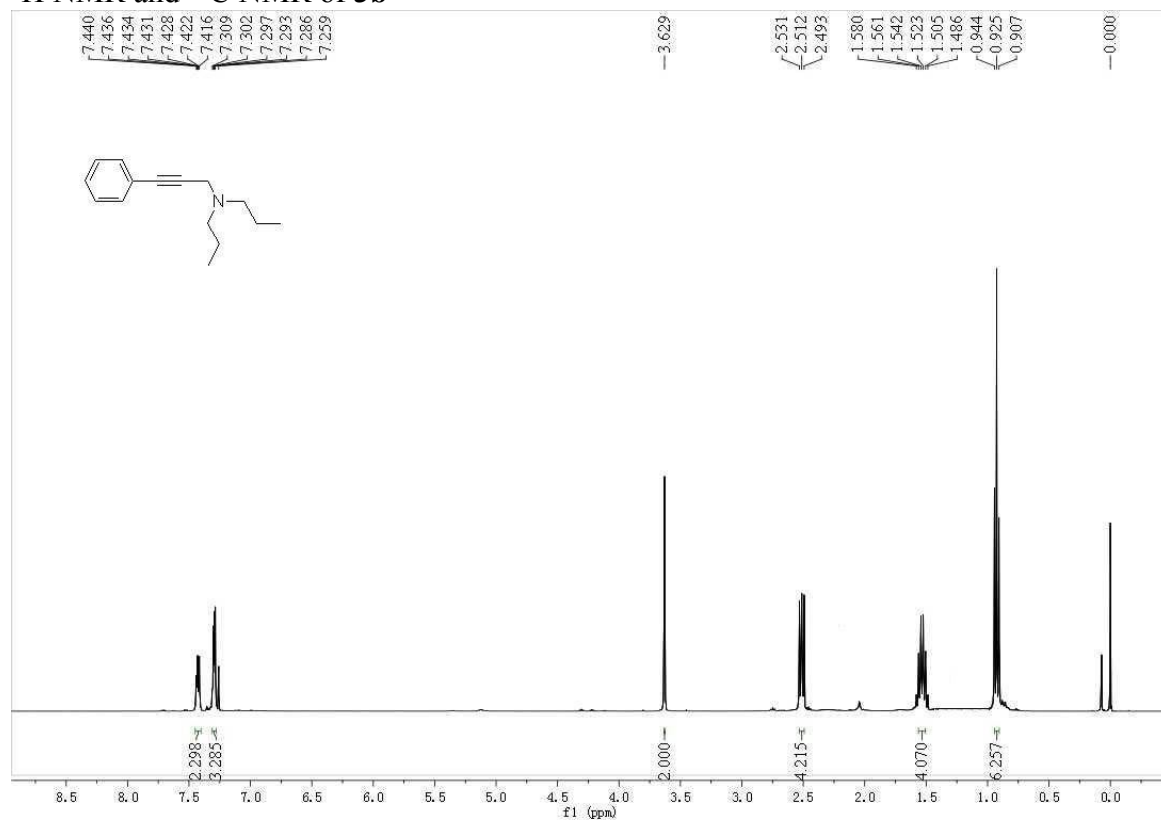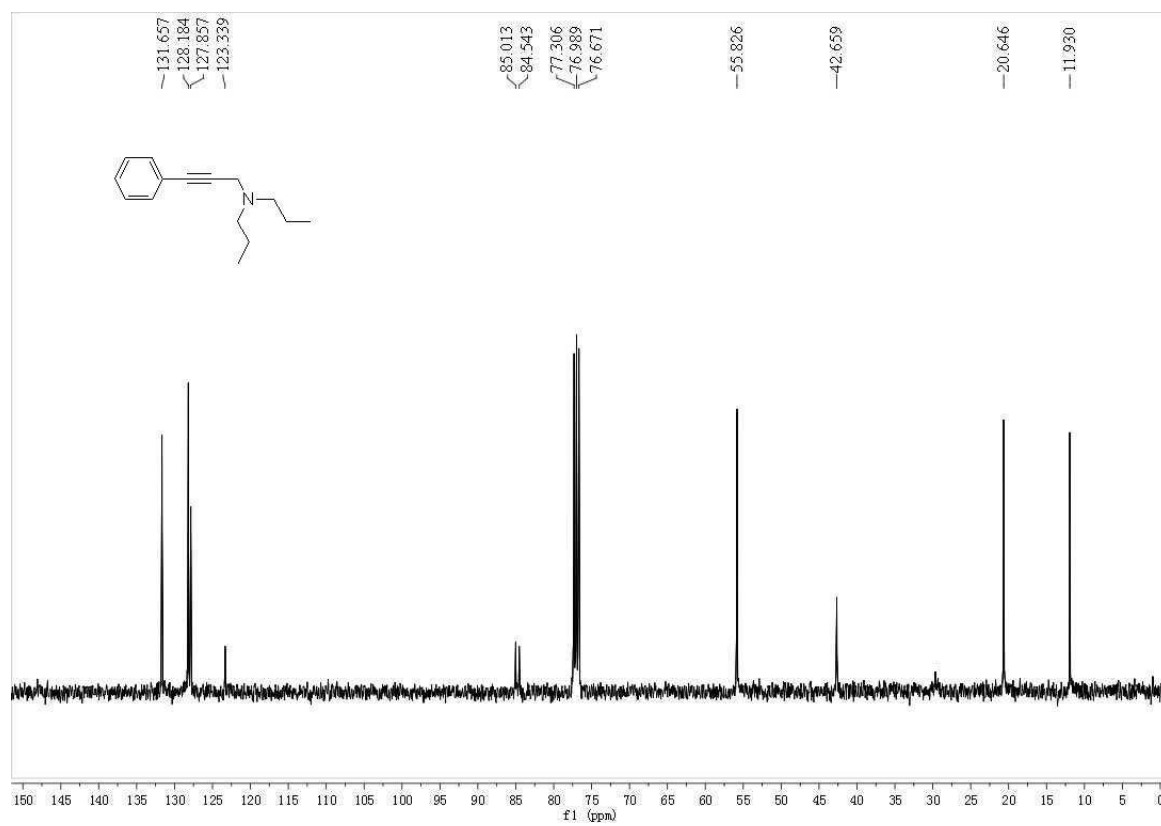

### $^1\text{H}$ NMR and $^{13}\text{C}$ NMR of **3c**

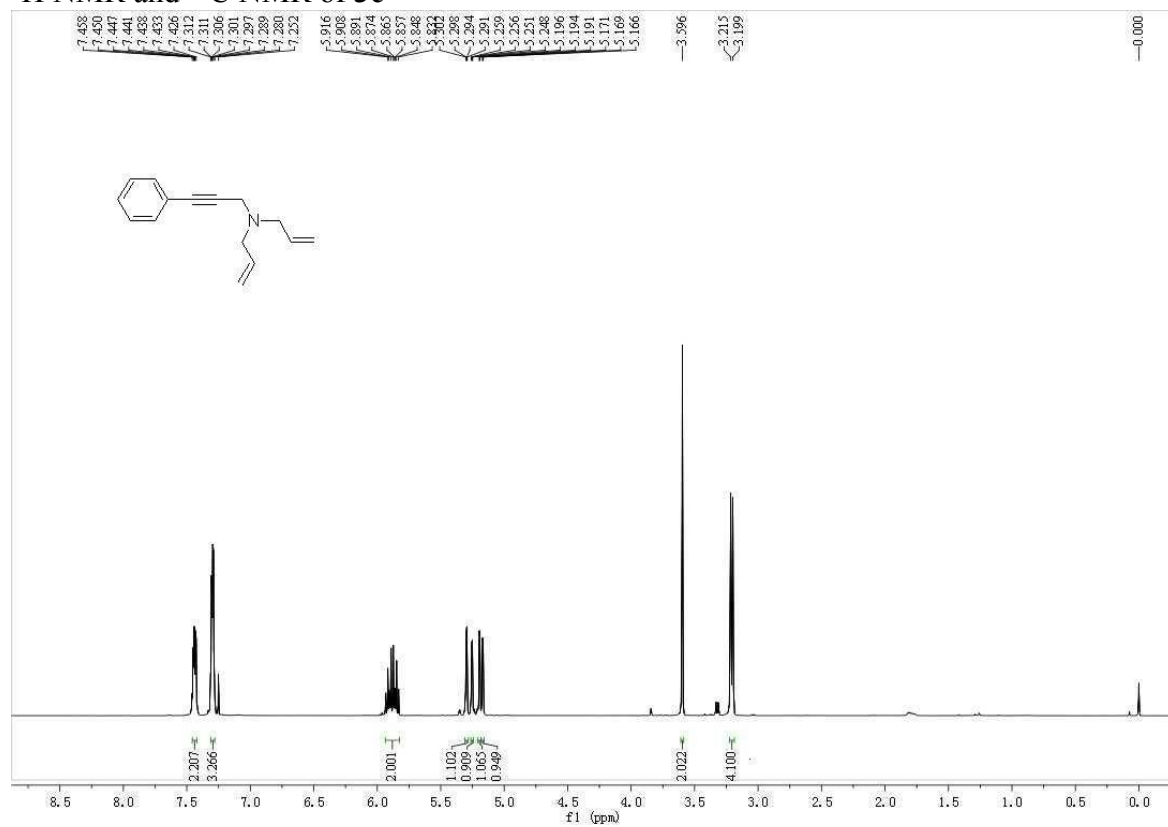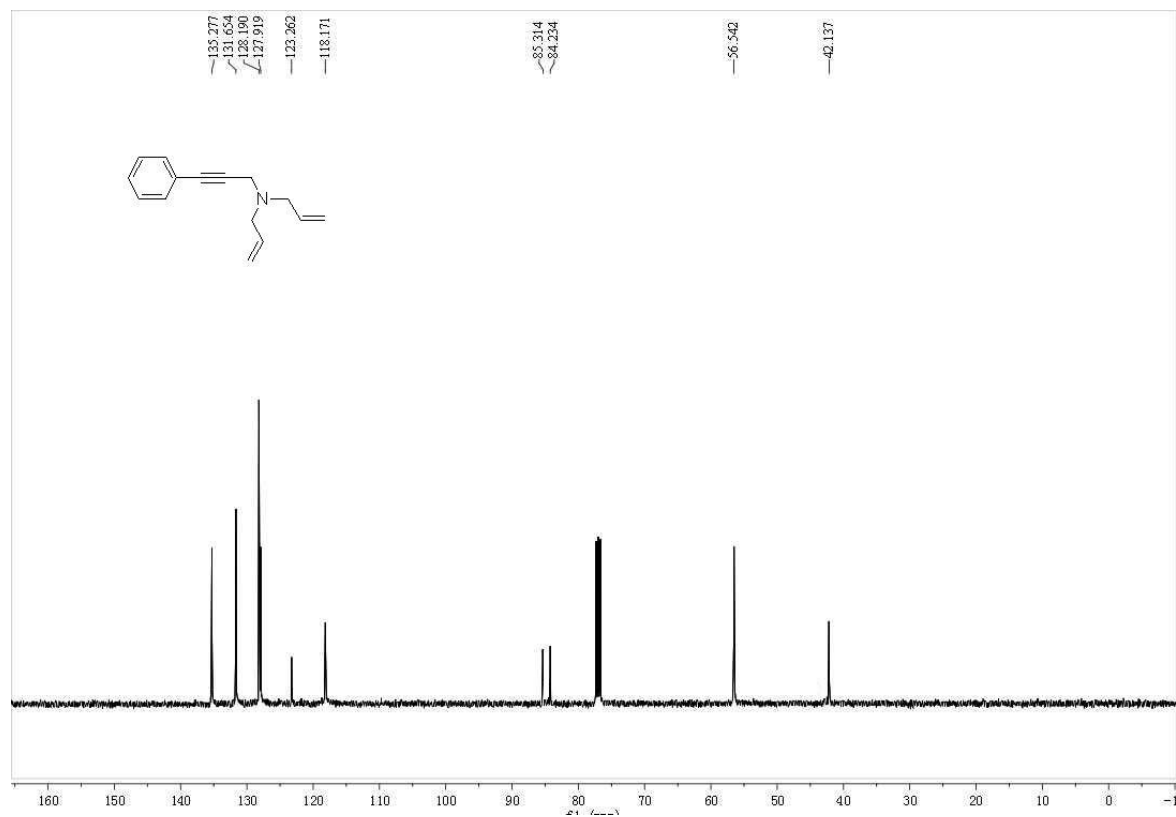

### $^1\text{H}$ NMR and $^{13}\text{C}$ NMR of **3d**

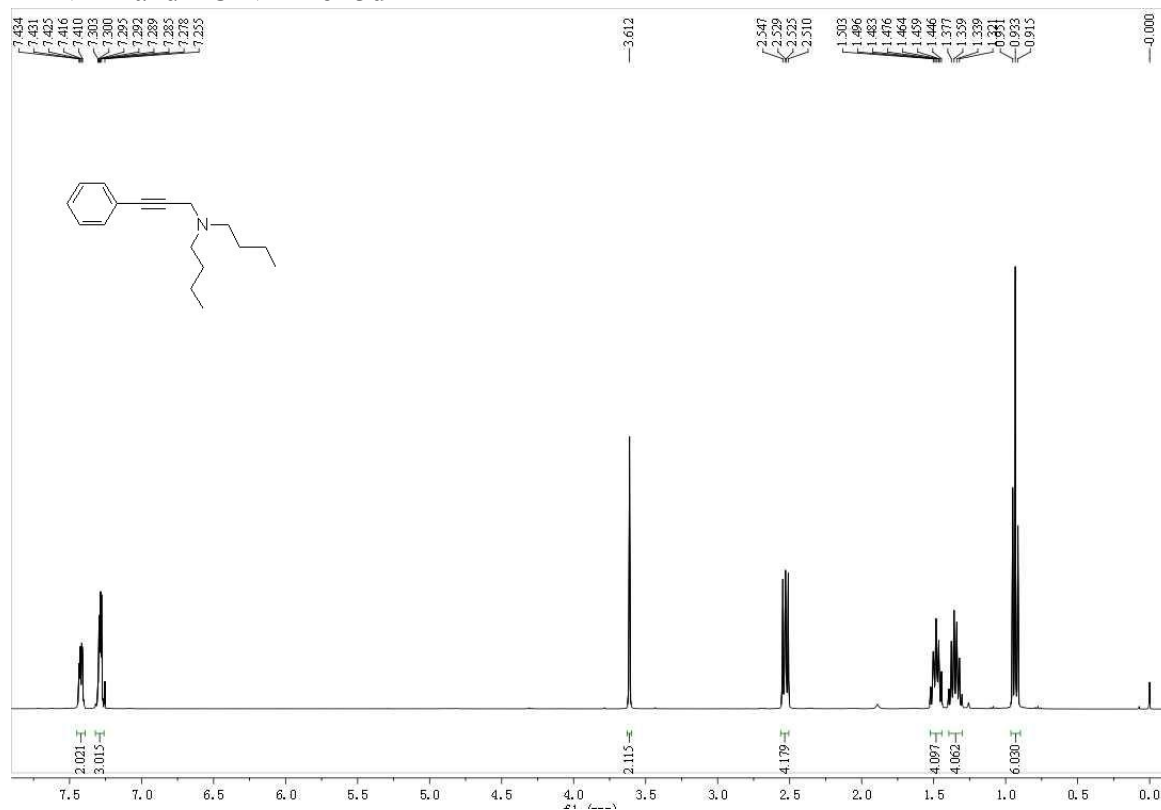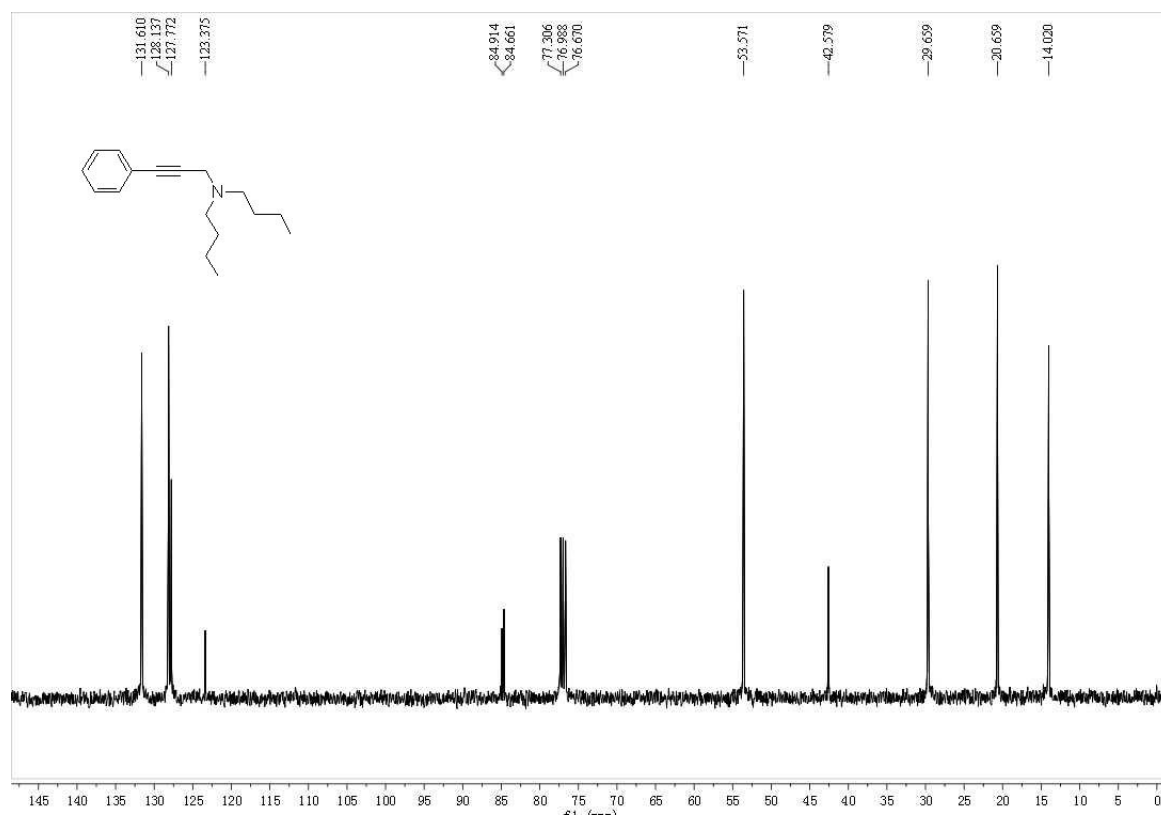

### $^1\text{H}$ NMR and $^{13}\text{C}$ NMR of **3e**

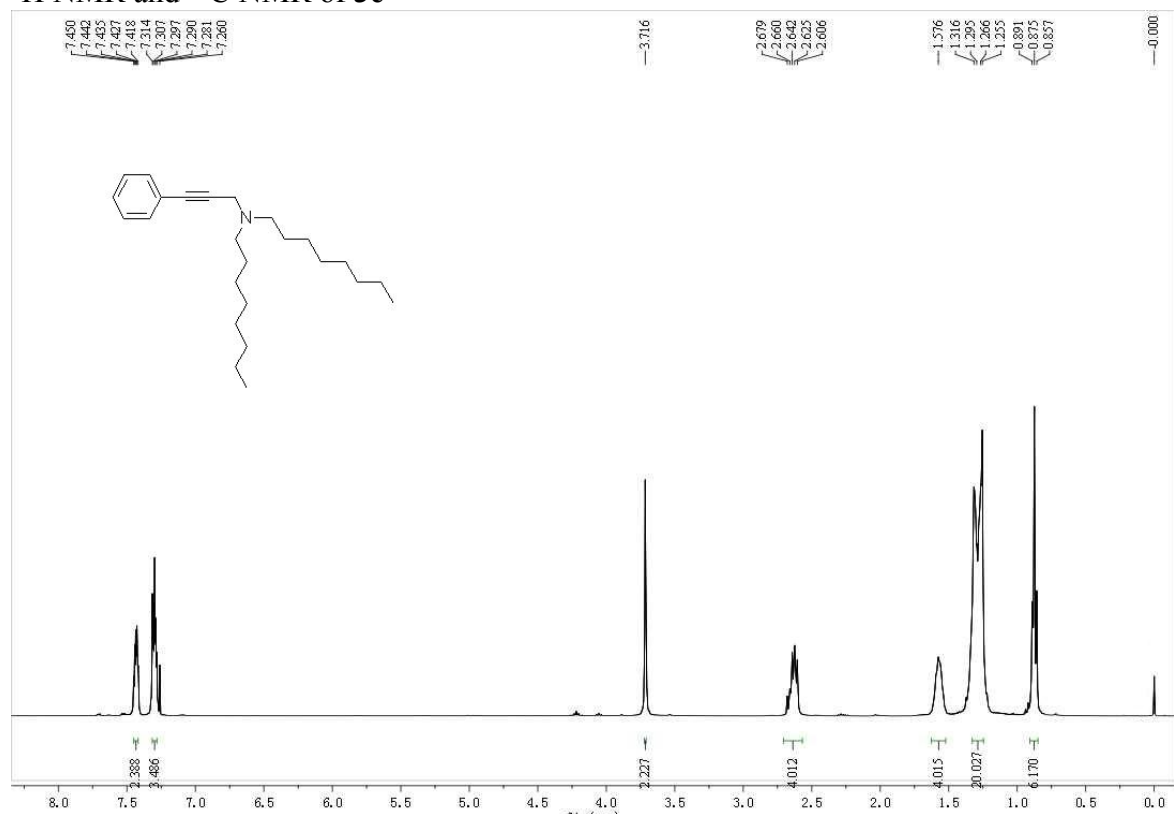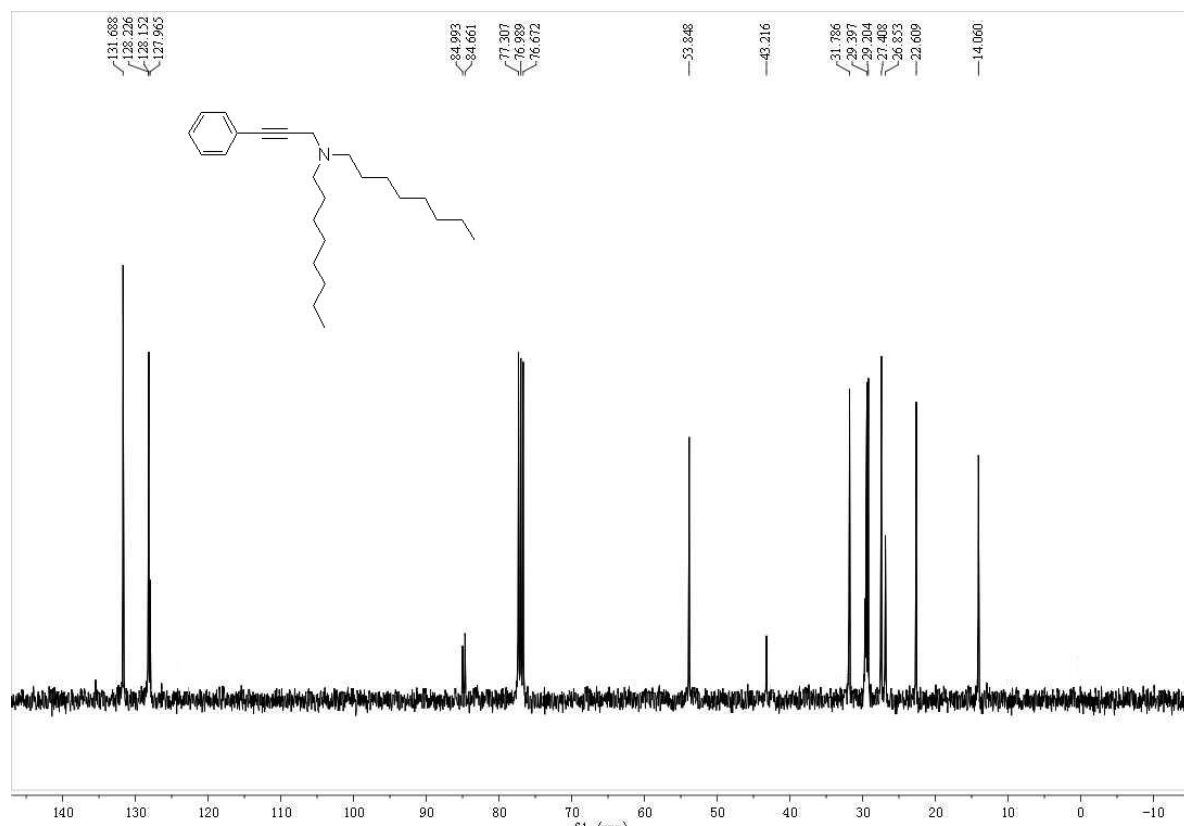



### $^1\text{H}$ NMR and $^{13}\text{C}$ NMR of **3f**

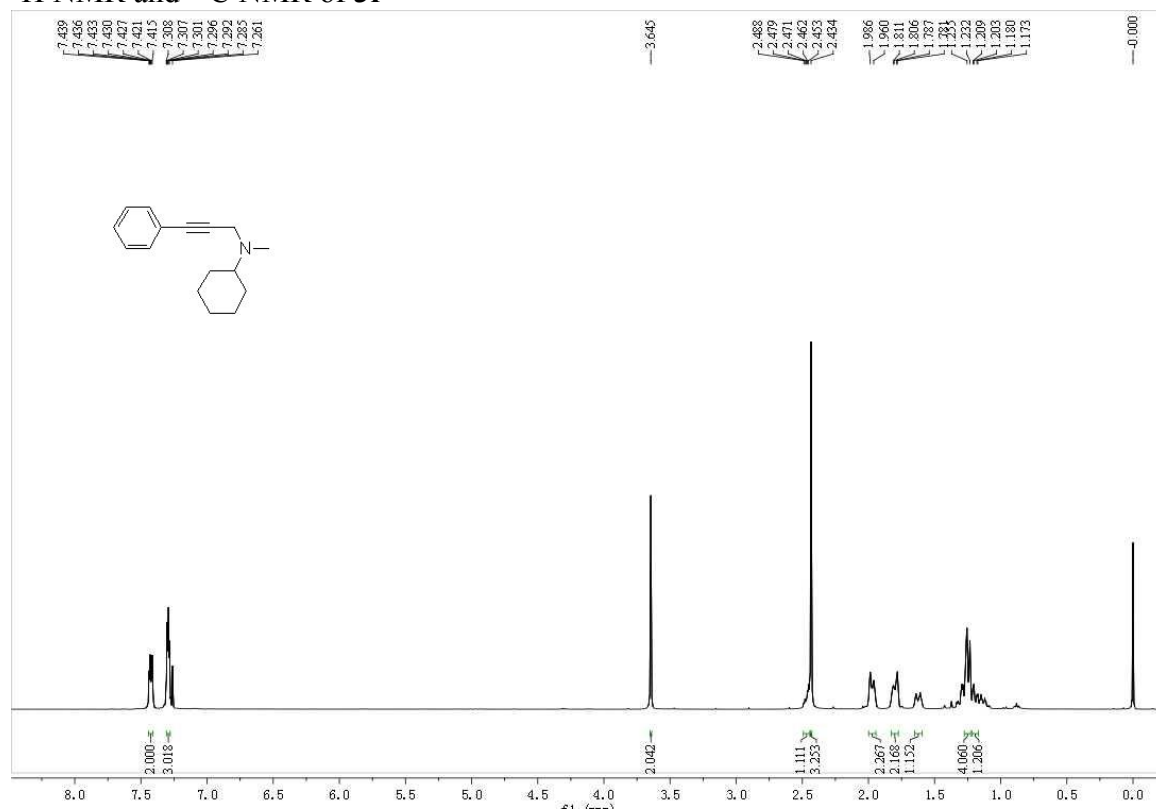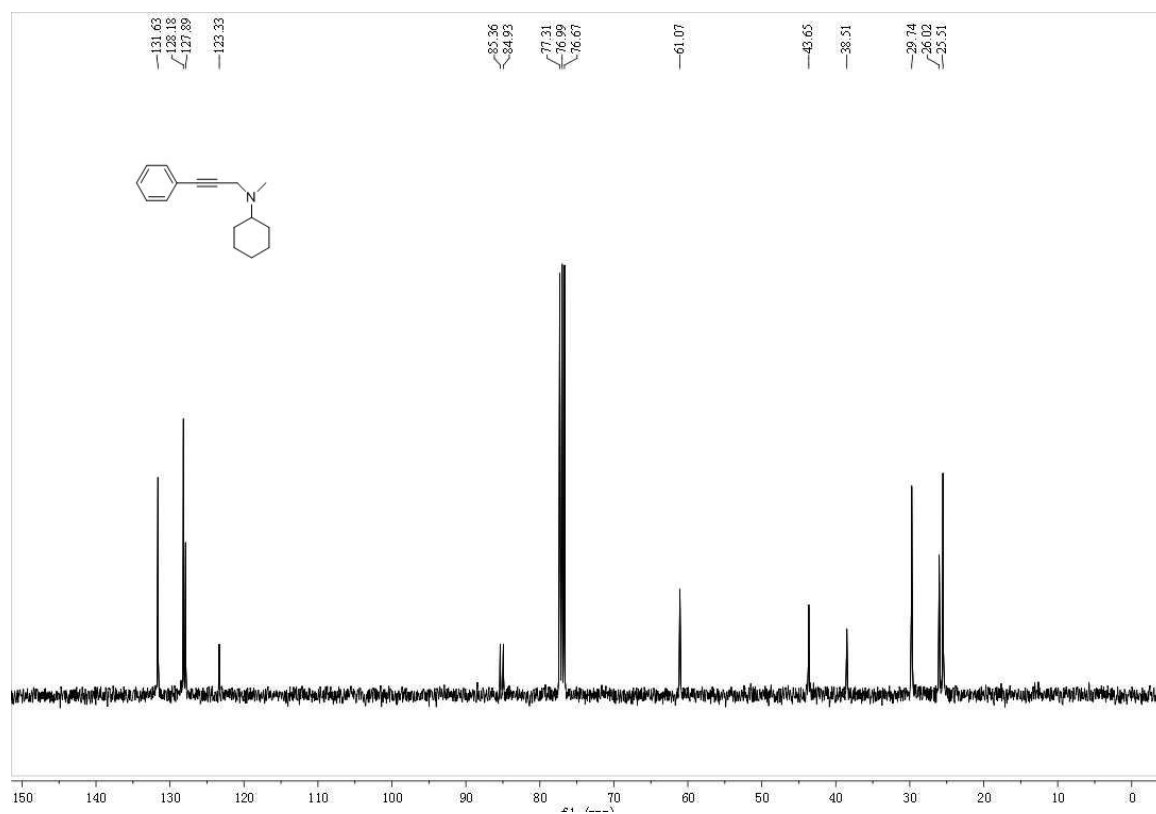

### $^1\text{H}$ NMR and $^{13}\text{C}$ NMR of **3g**

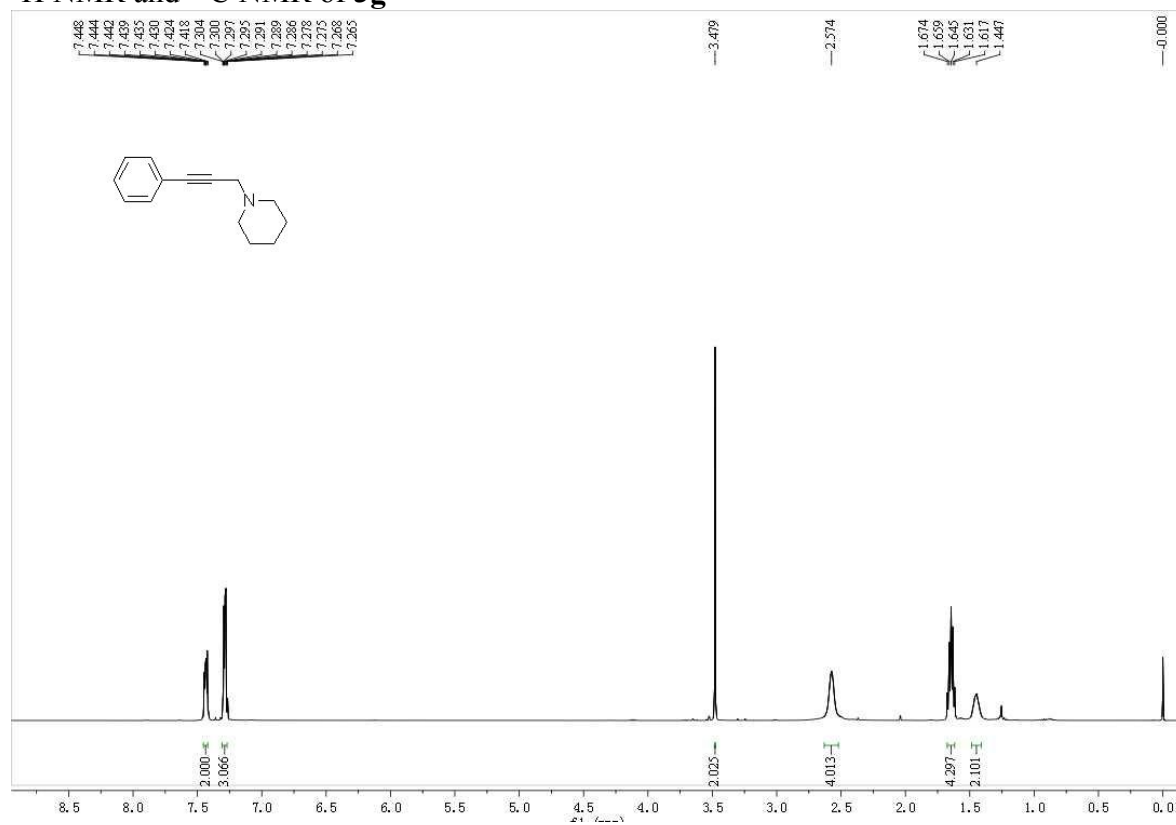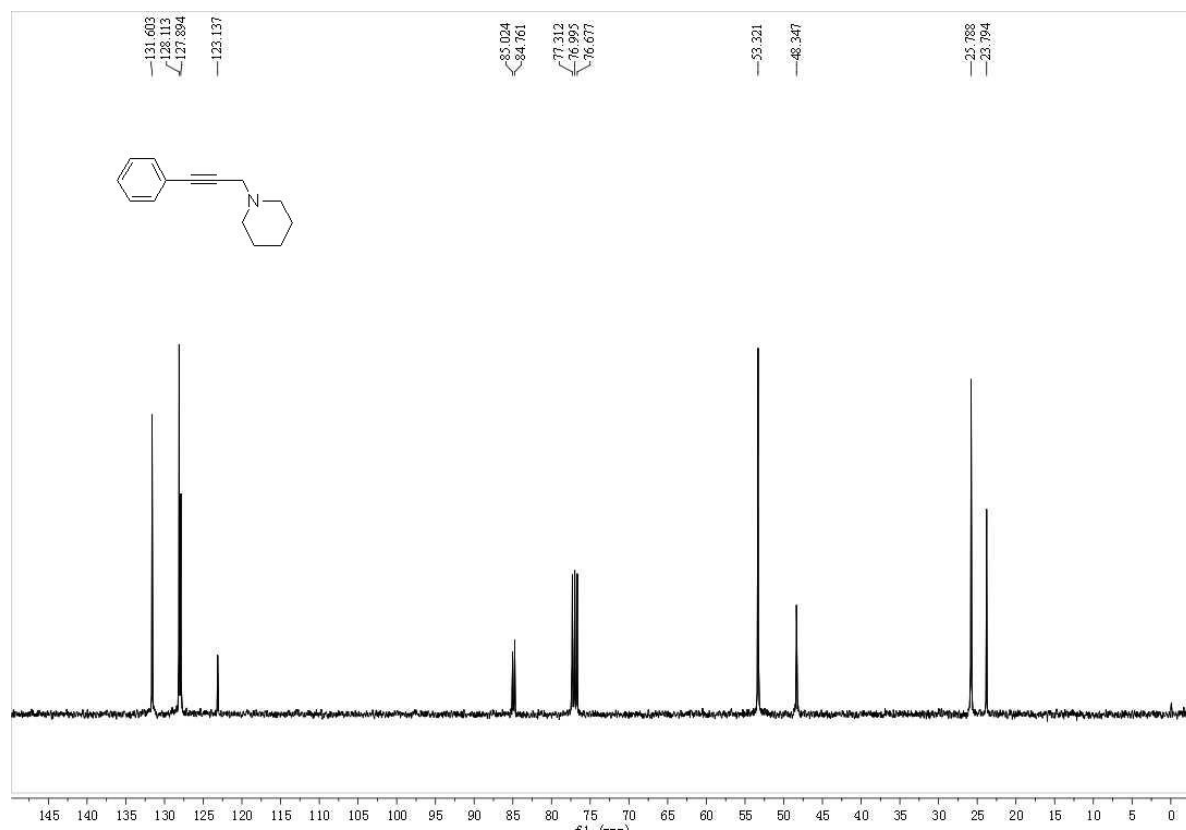

### $^1\text{H}$ NMR and $^{13}\text{C}$ NMR of **3h**

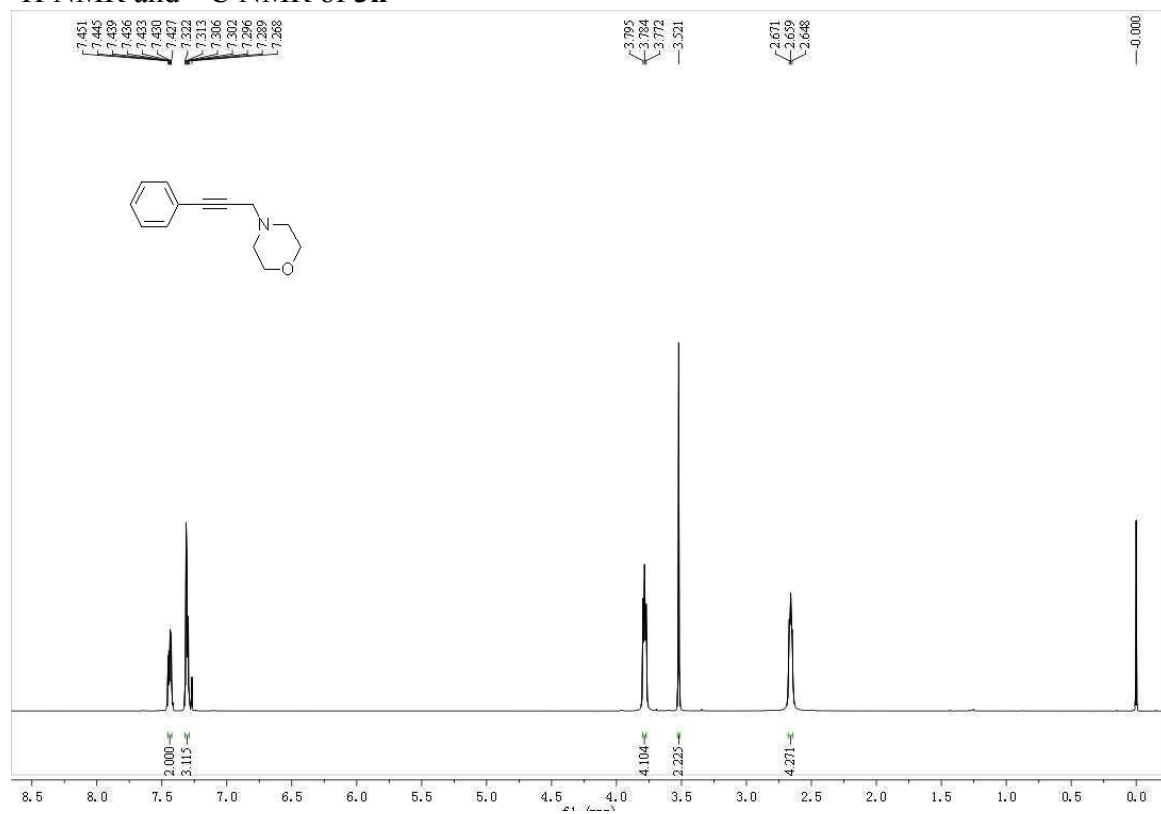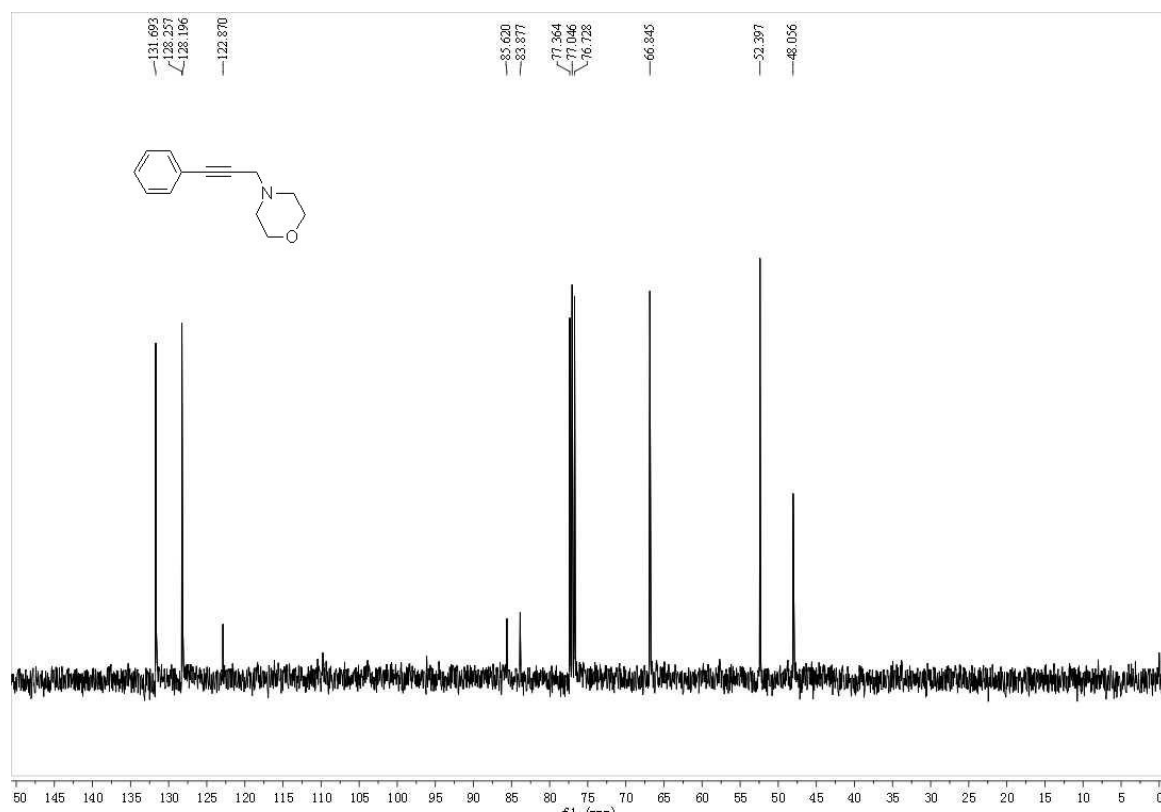

### $^1\text{H}$ NMR and $^{13}\text{C}$ NMR of **3i**

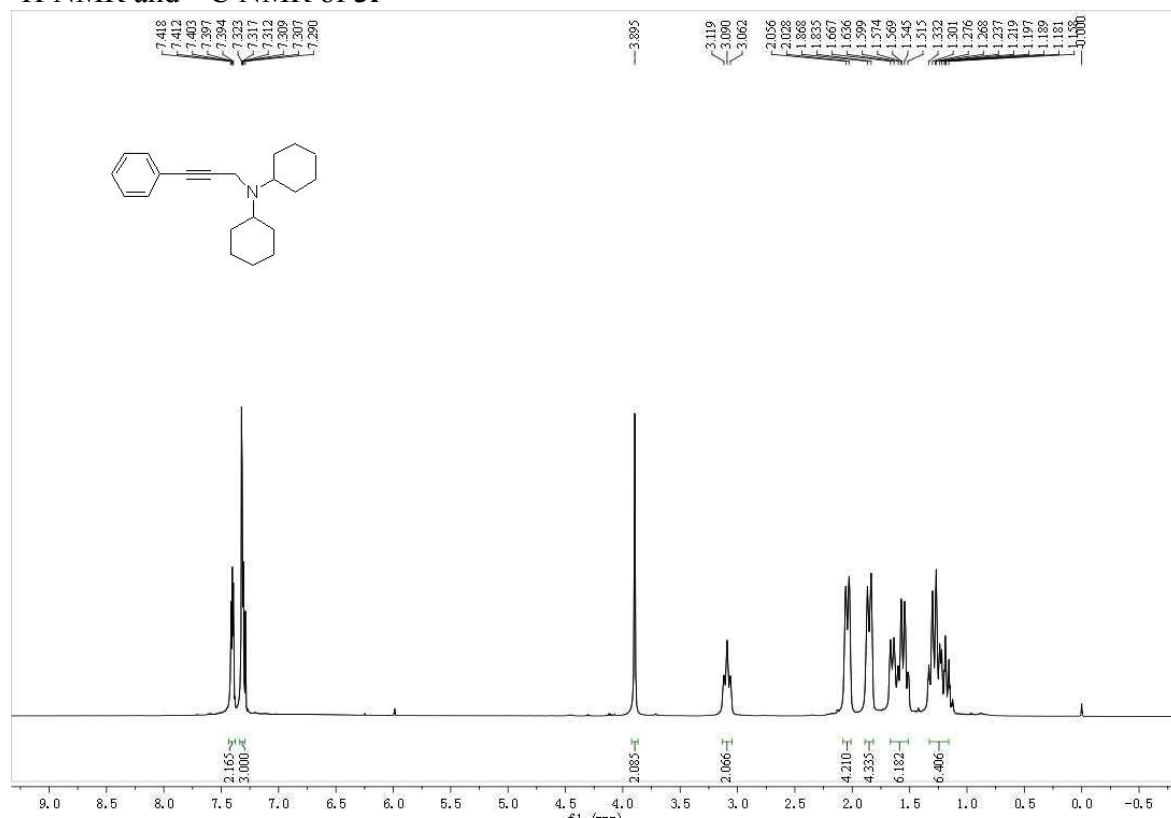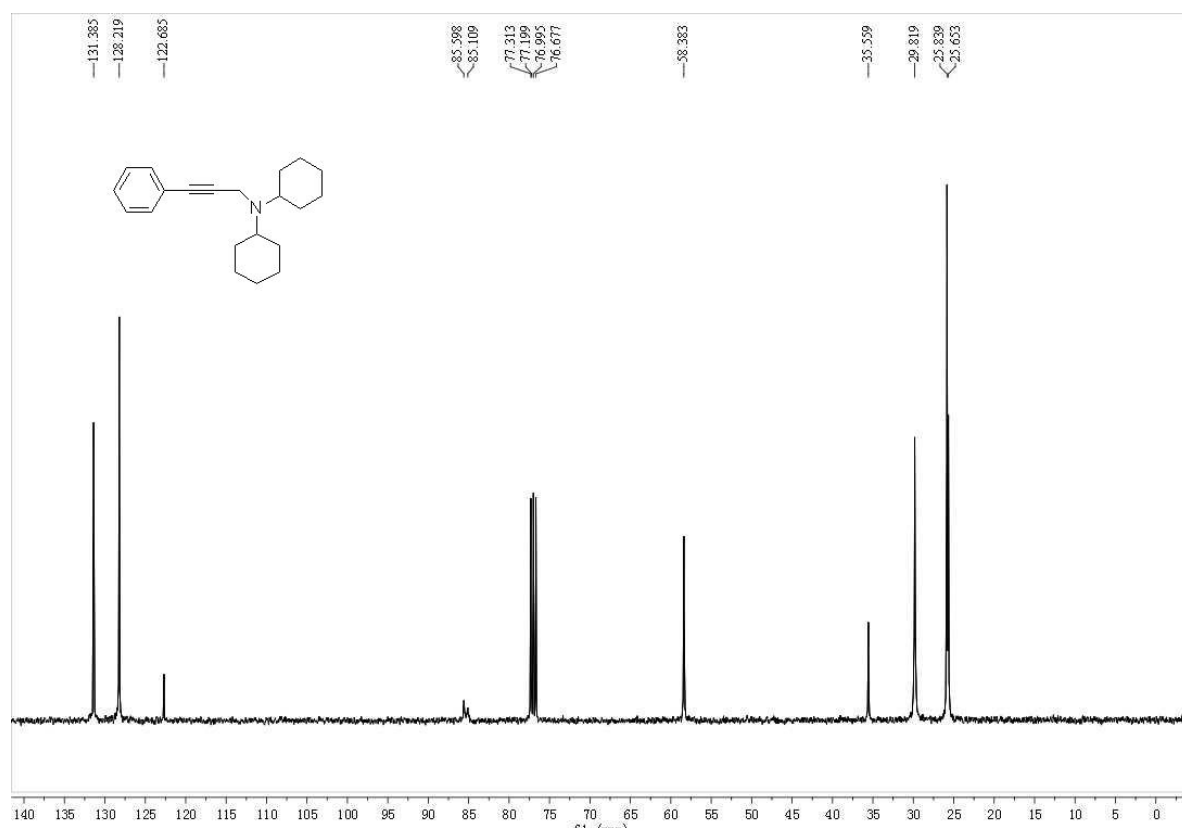

### $^1\text{H}$ NMR and $^{13}\text{C}$ NMR of **3j**

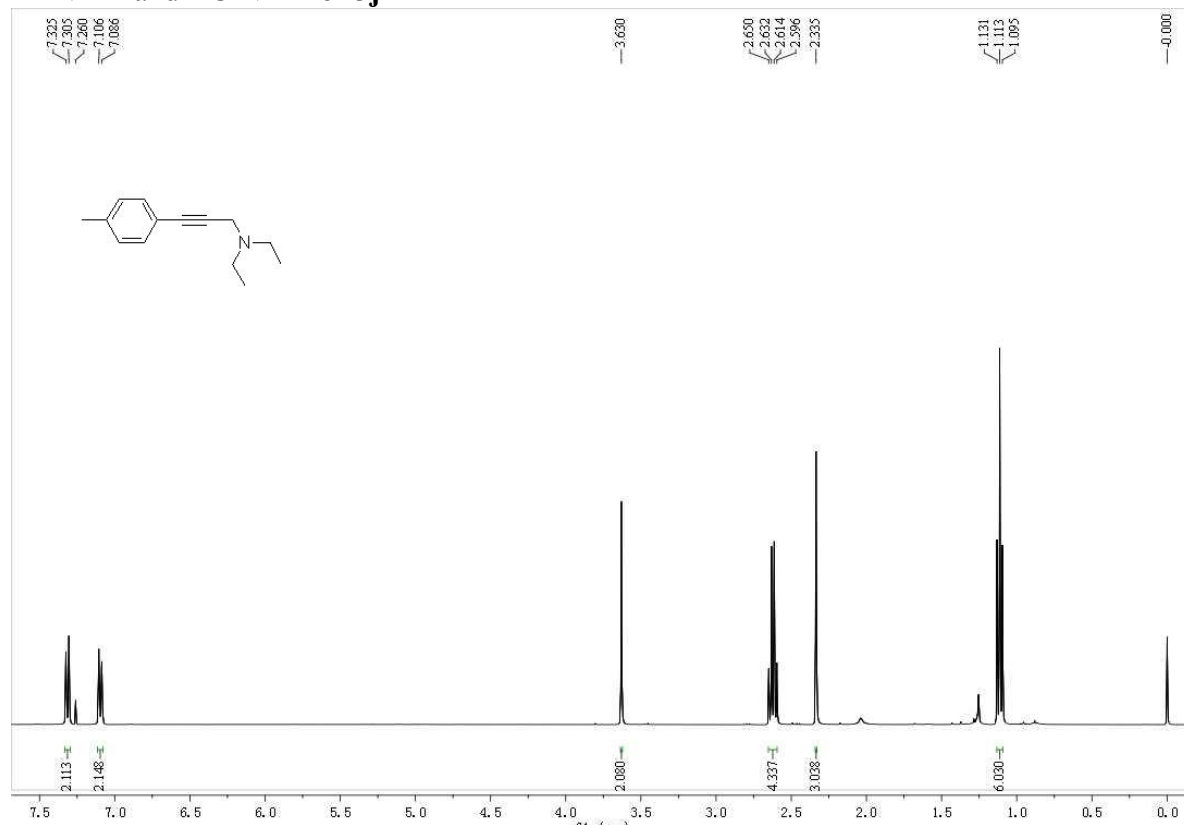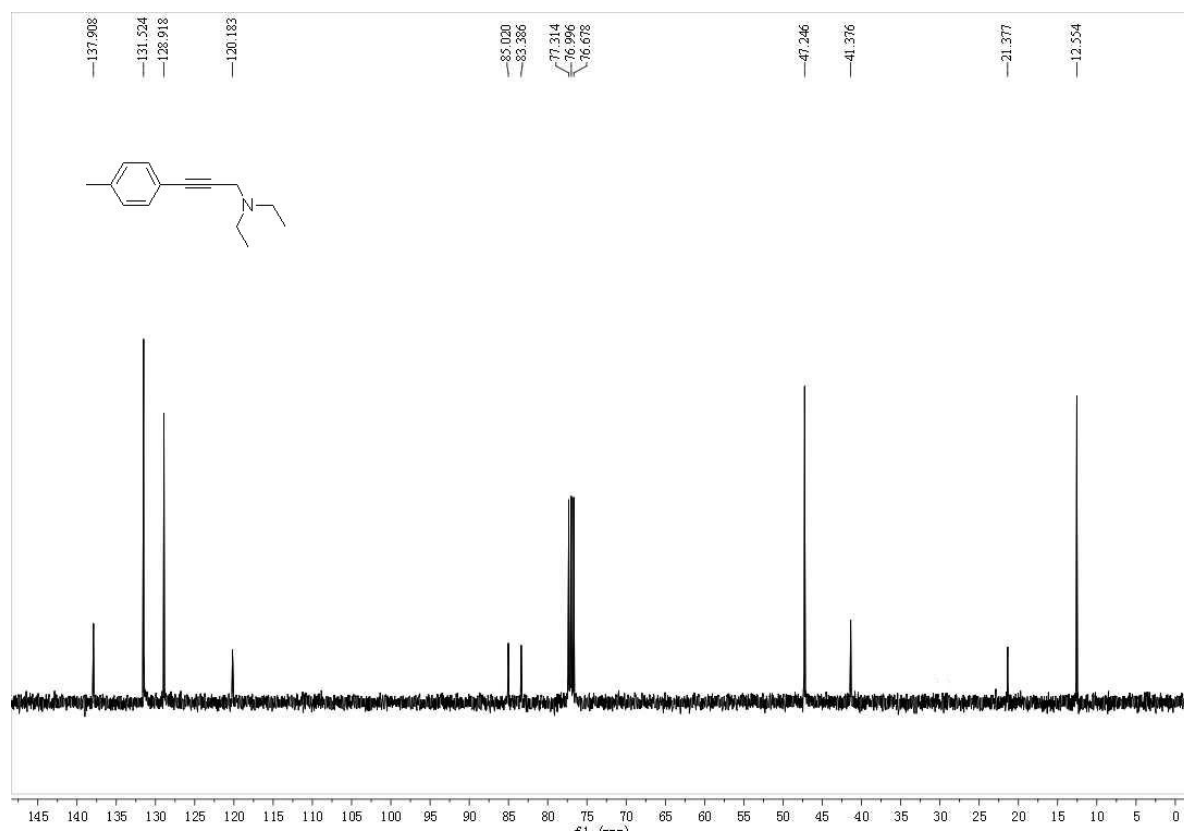

### $^1\text{H}$ NMR and $^{13}\text{C}$ NMR of **3k**

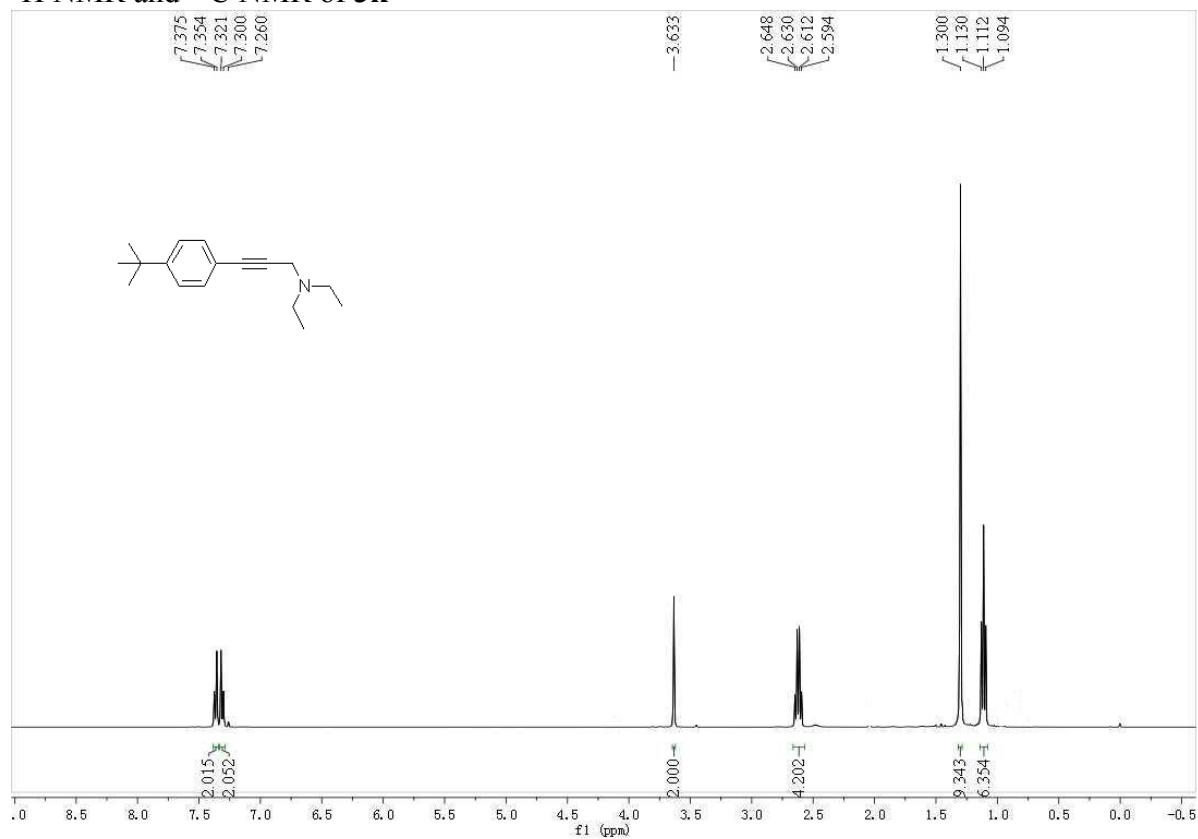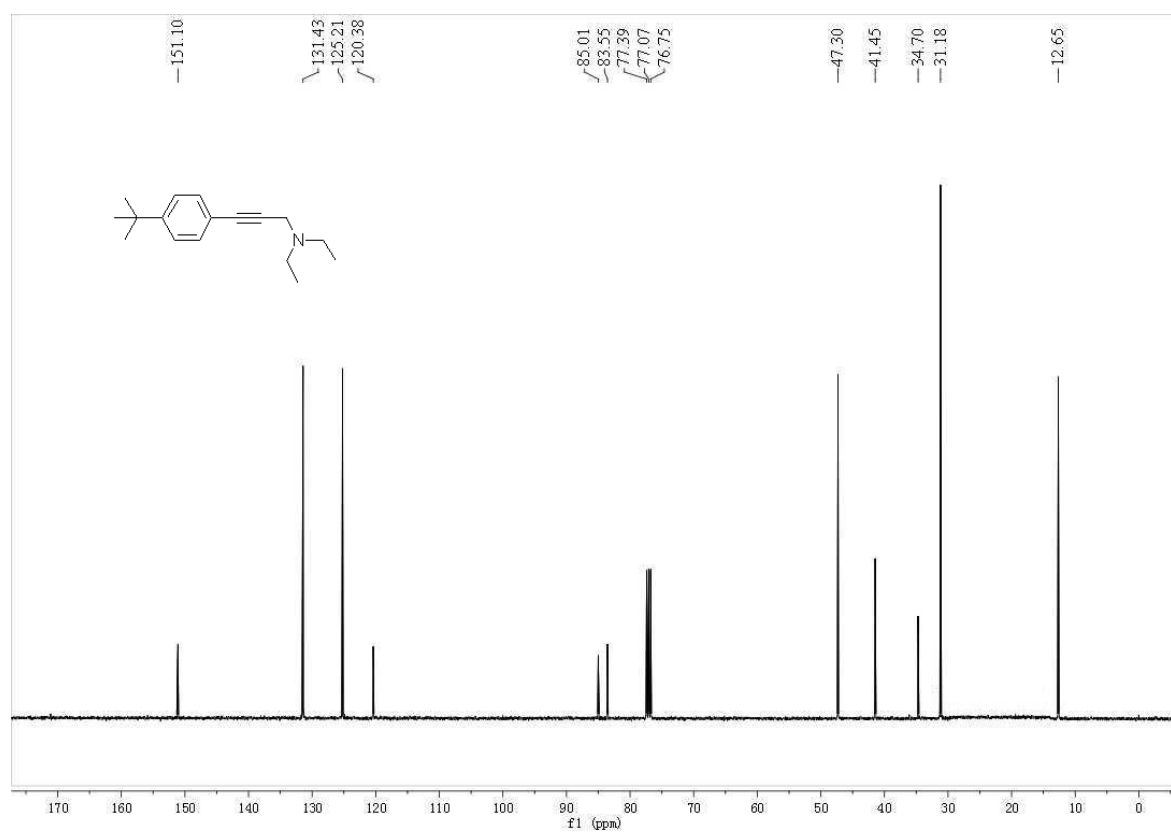

### $^1\text{H}$ NMR and $^{13}\text{C}$ NMR of **31**

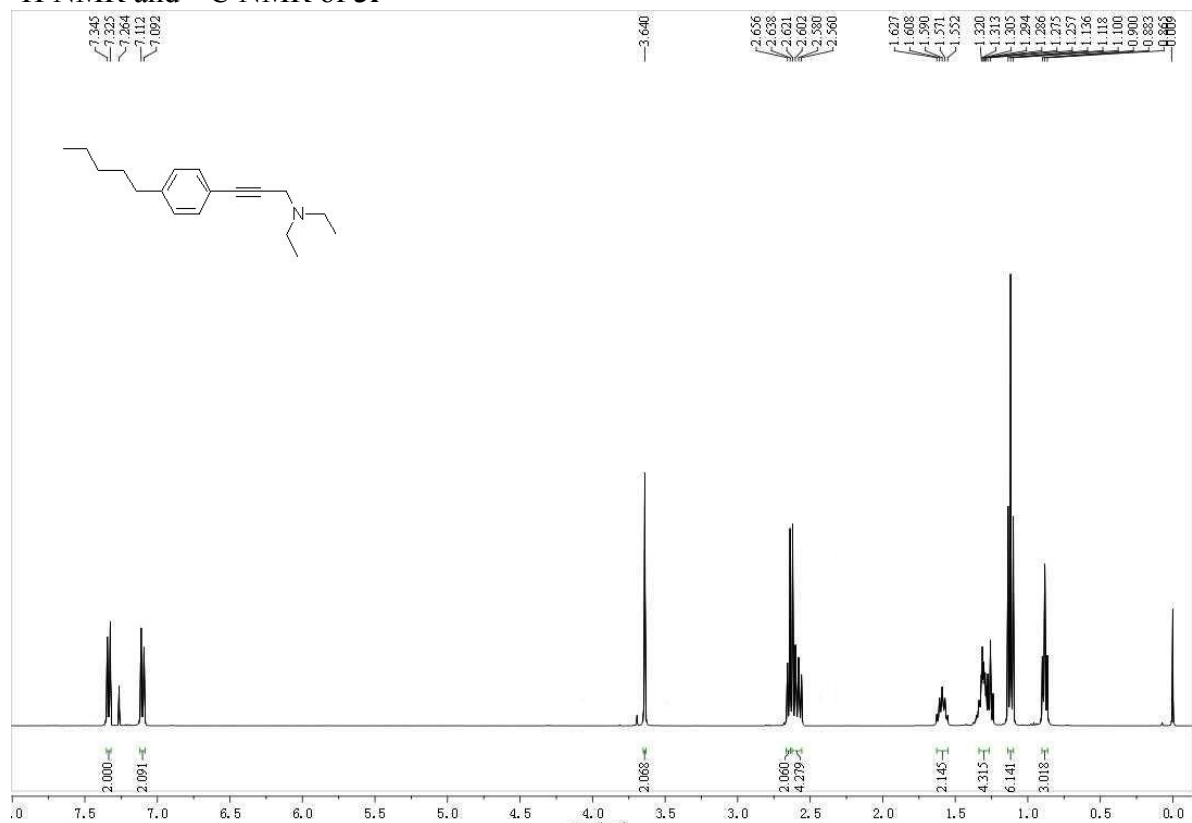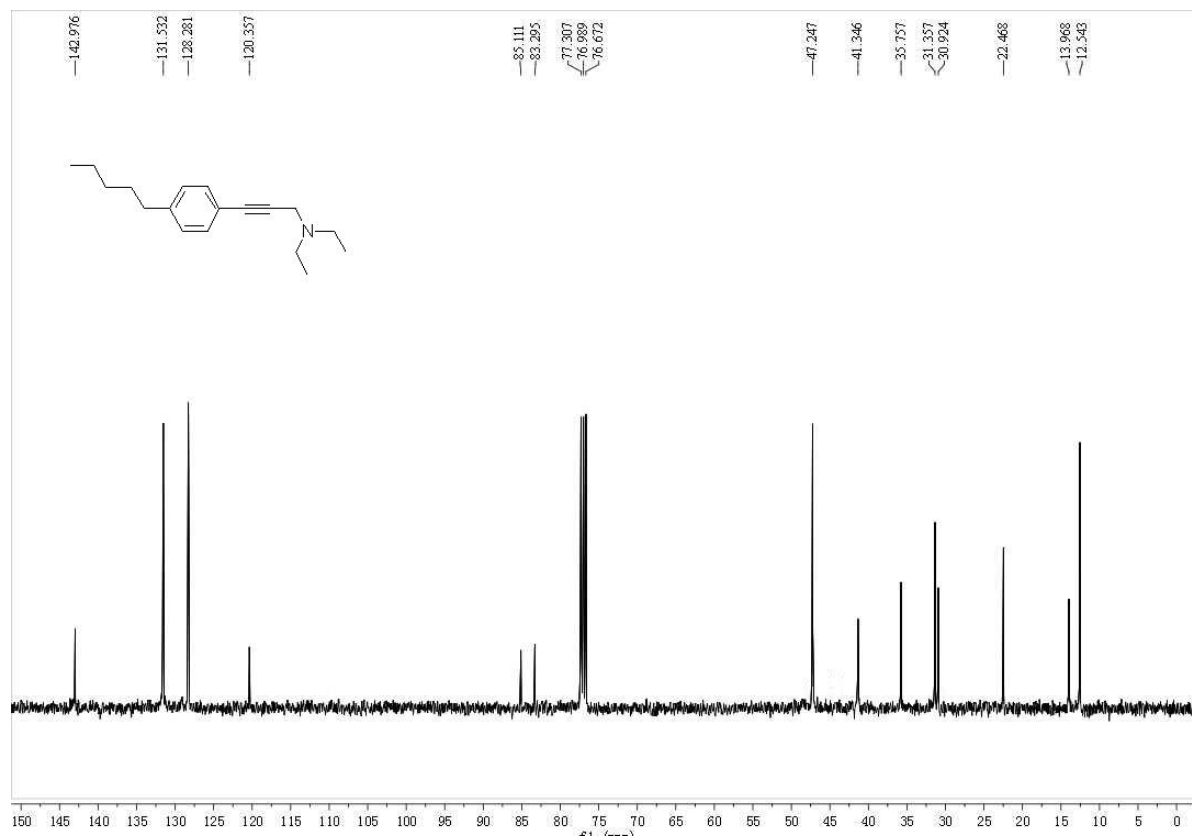

### $^1\text{H}$ NMR and $^{13}\text{C}$ NMR of **3m**

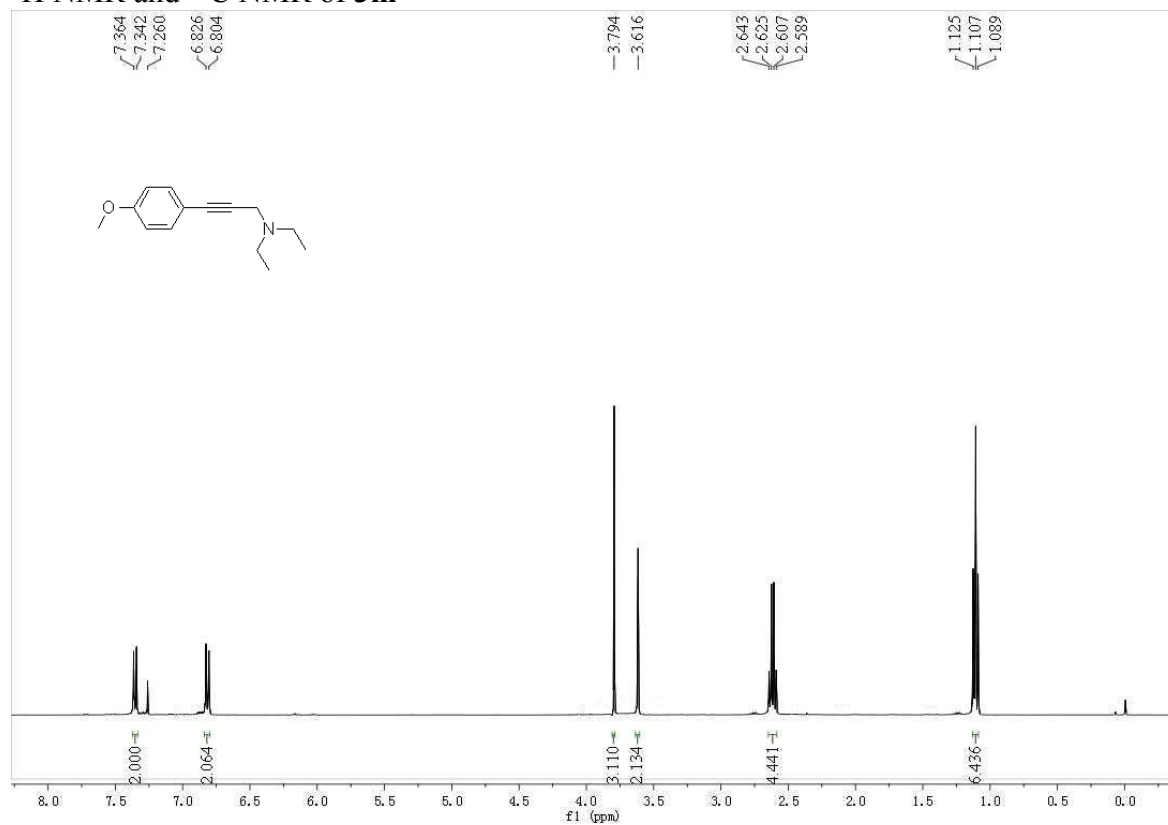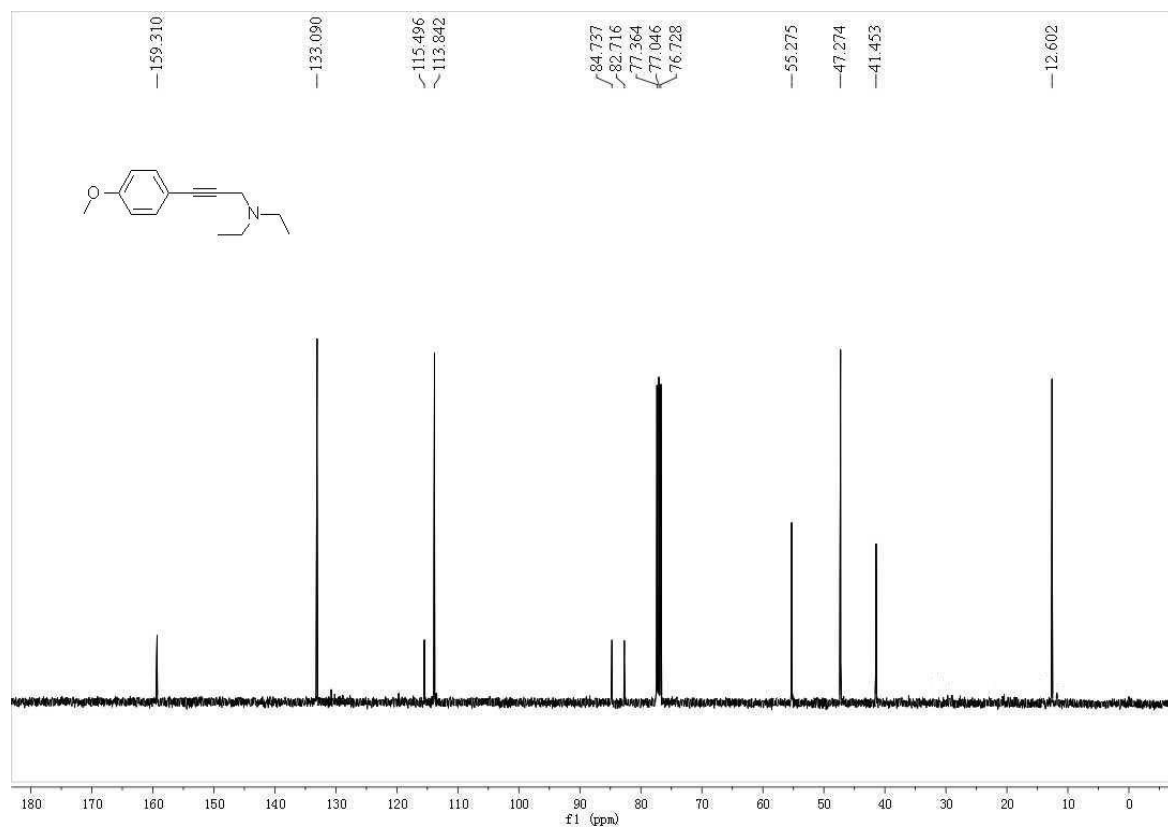



### $^1\text{H}$ NMR and $^{13}\text{C}$ NMR of **3n**

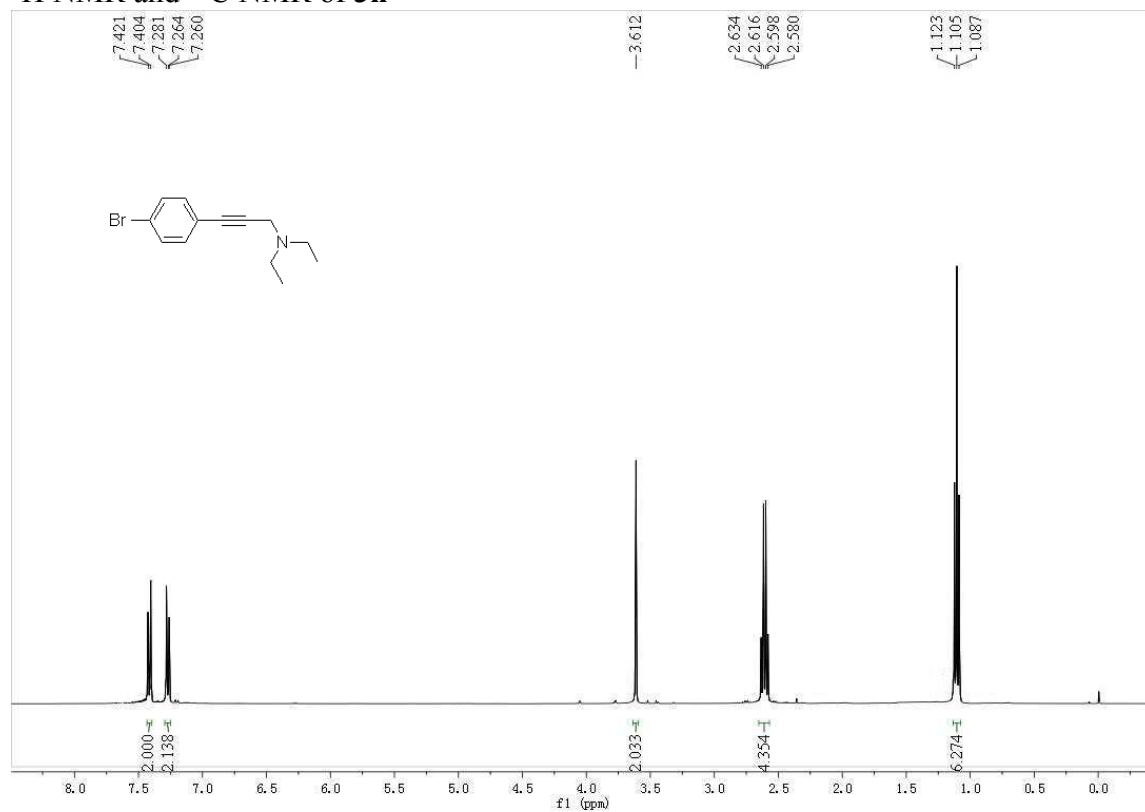

V

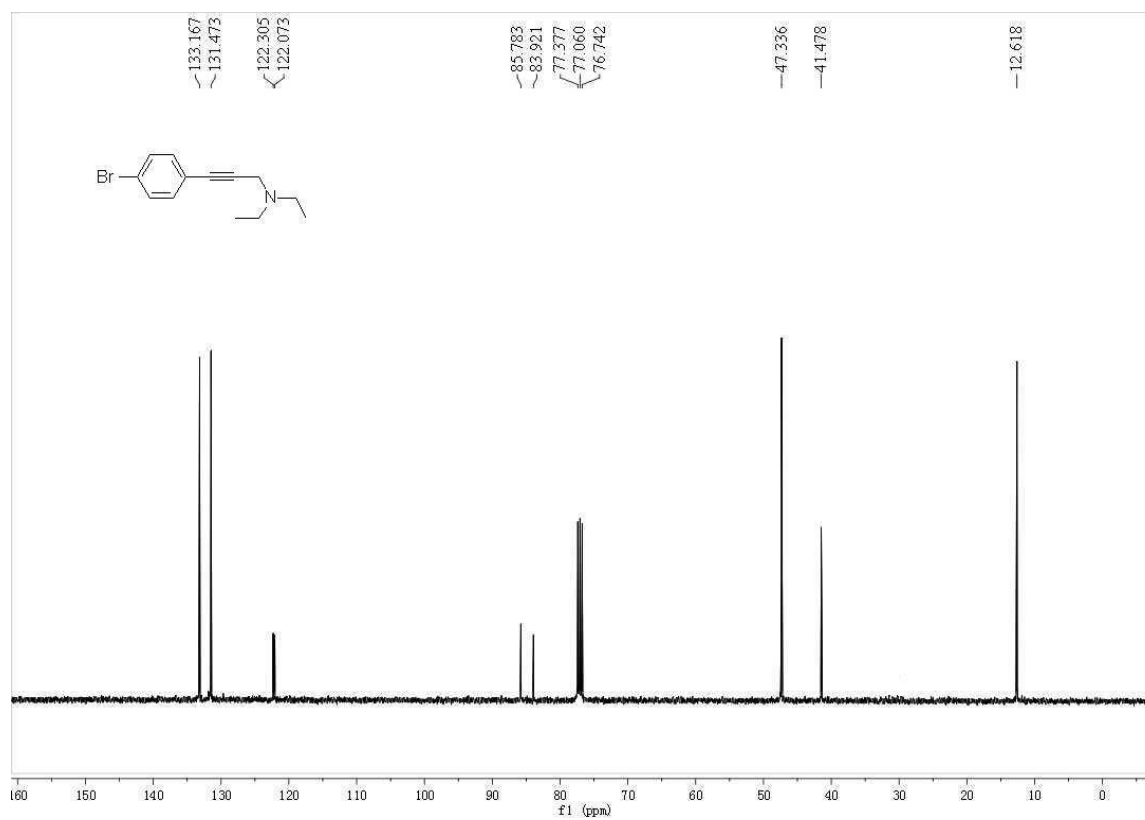

### $^1\text{H}$ NMR and $^{13}\text{C}$ NMR of **30**

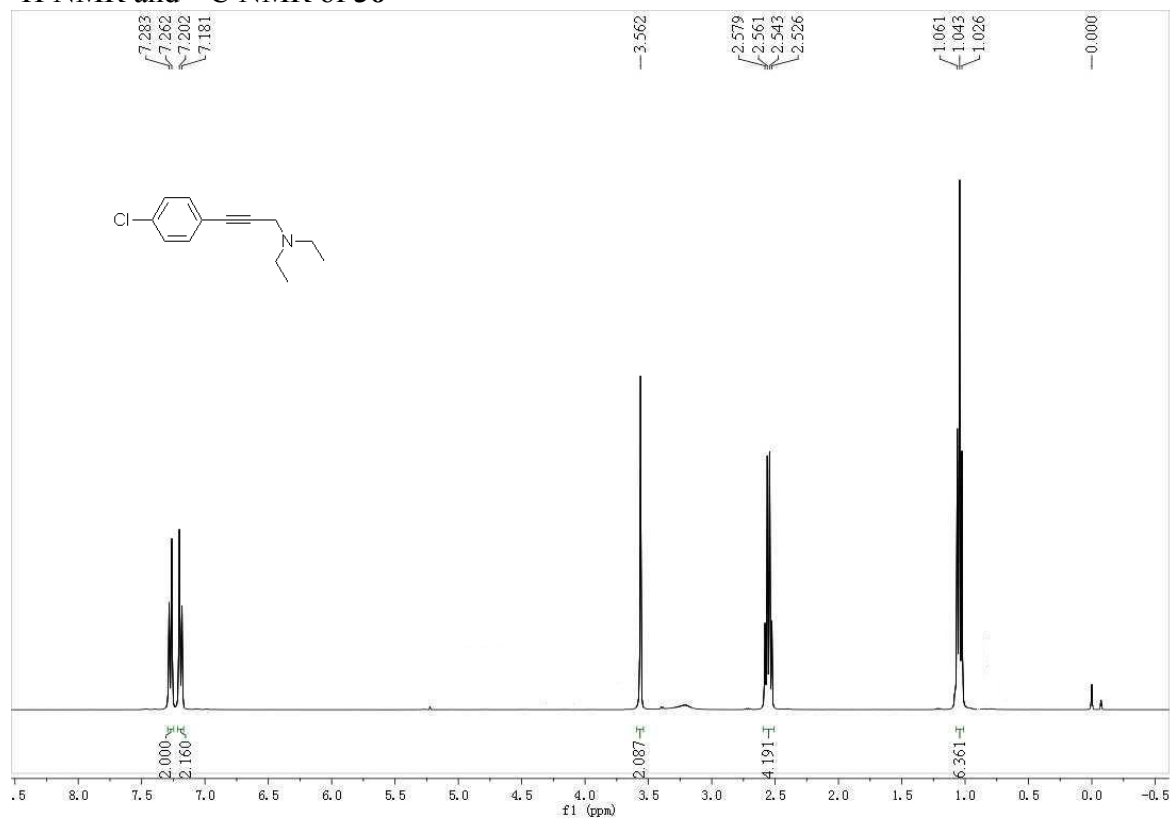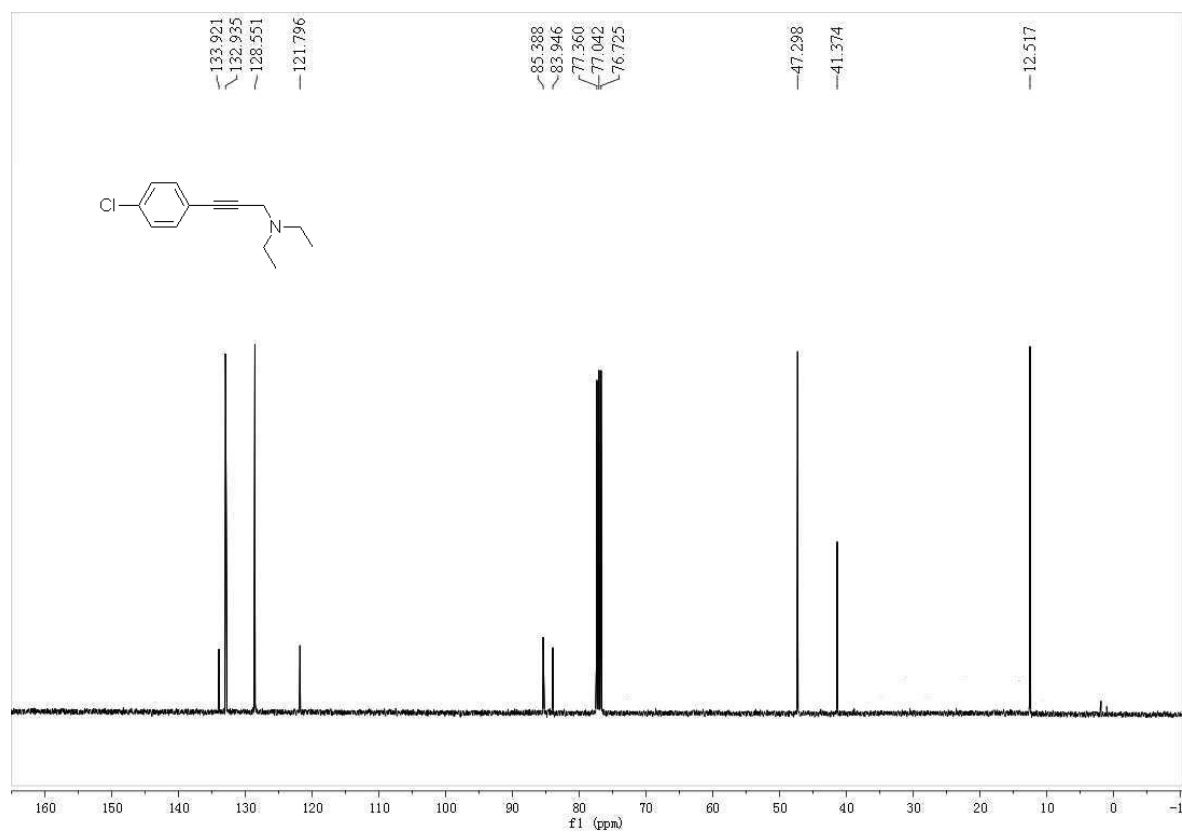

### $^1\text{H}$ NMR and $^{13}\text{C}$ NMR of **3p**

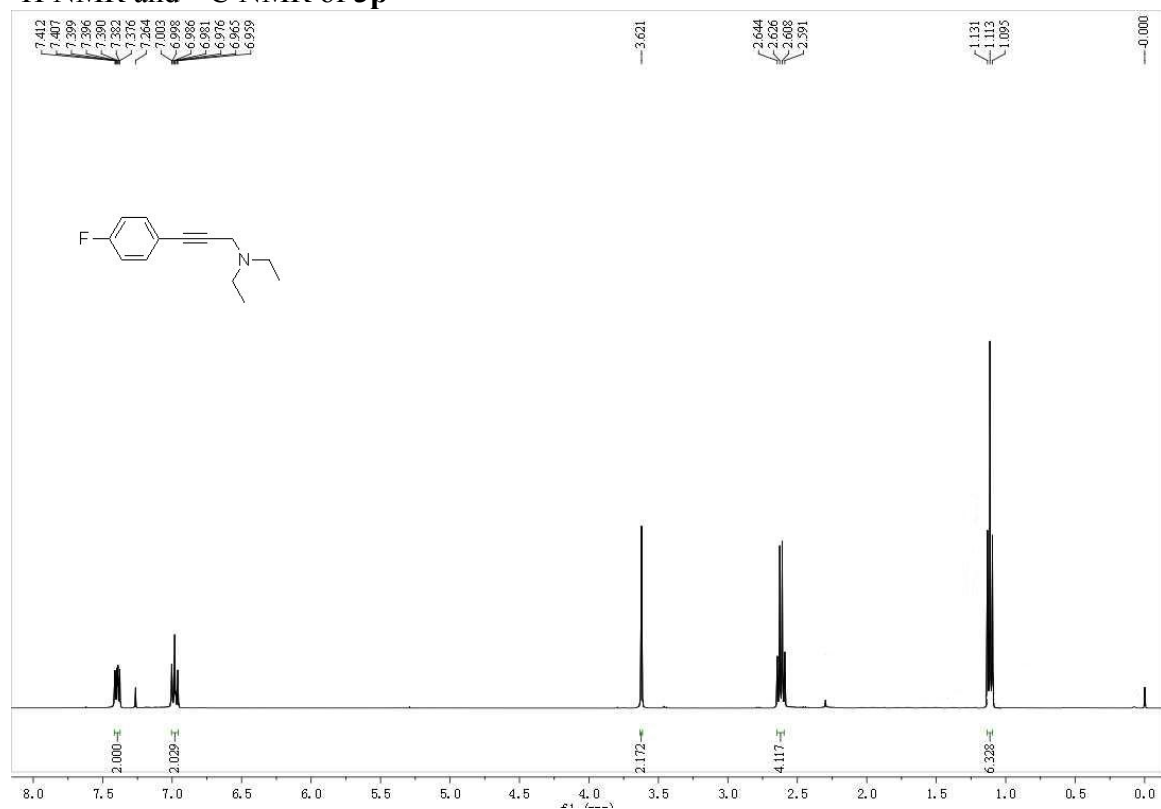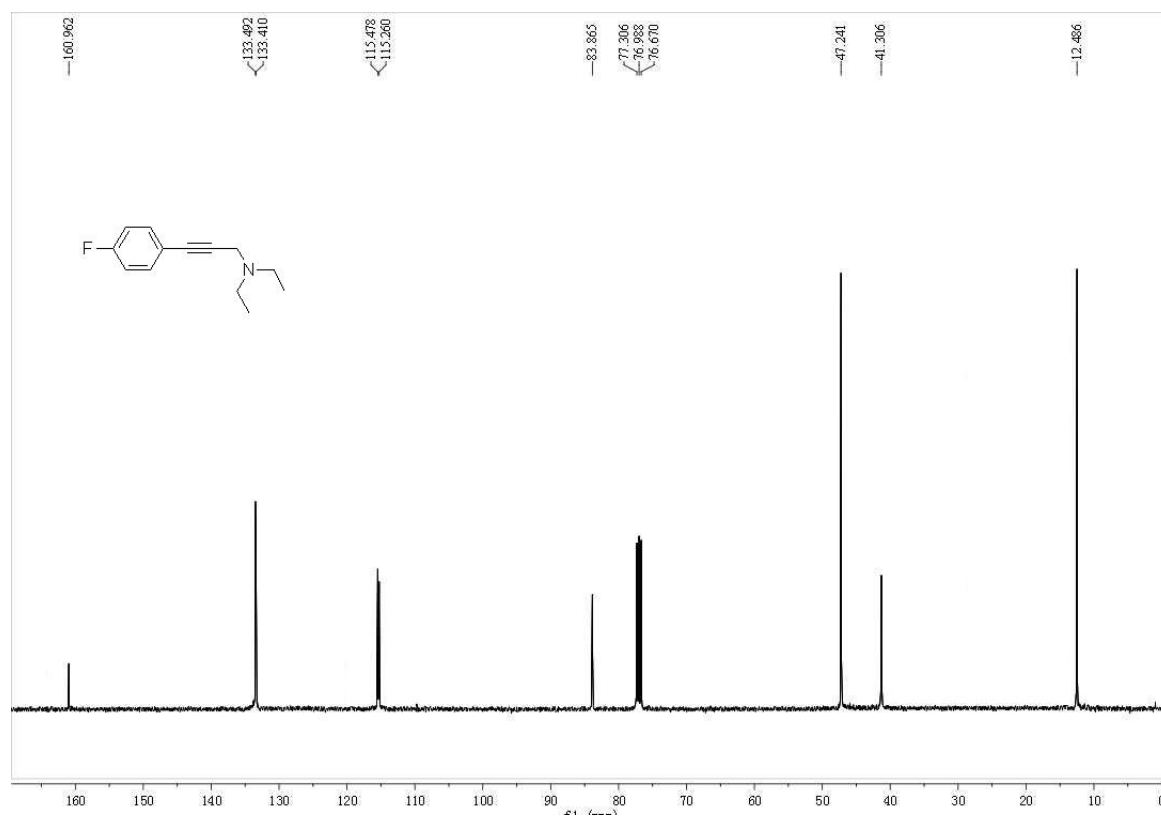

### $^1\text{H}$ NMR and $^{13}\text{C}$ NMR of **3q**

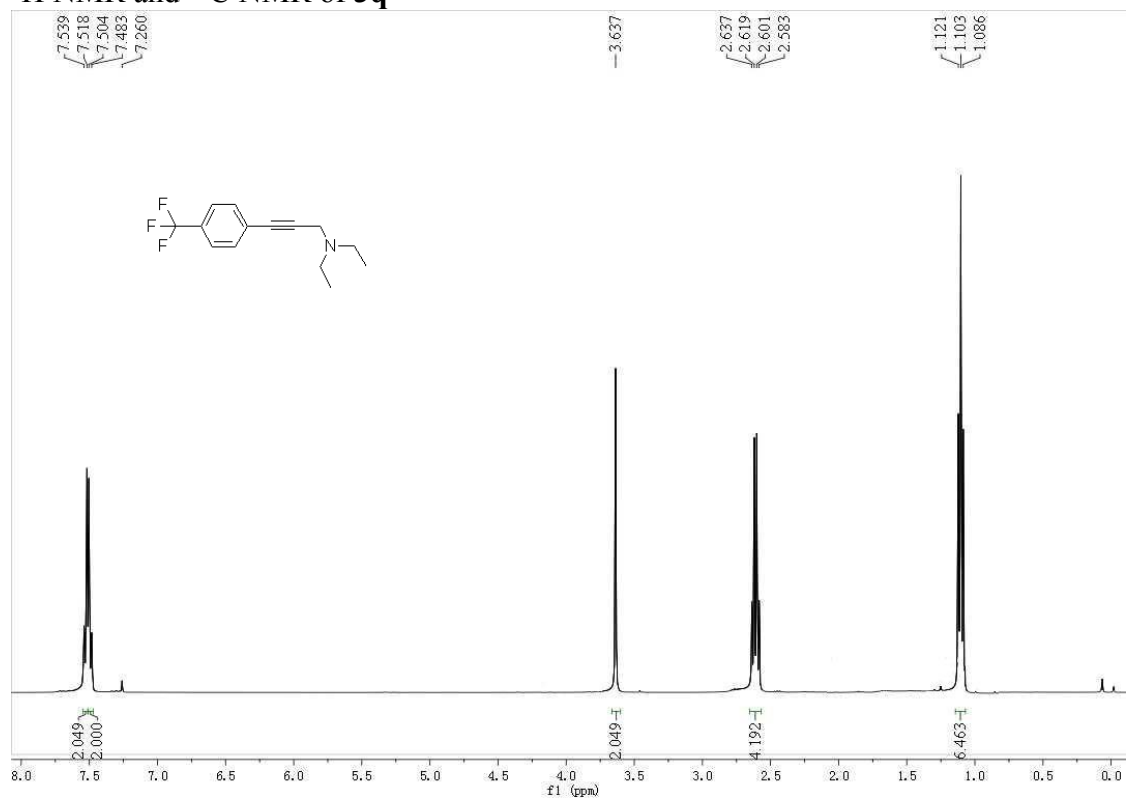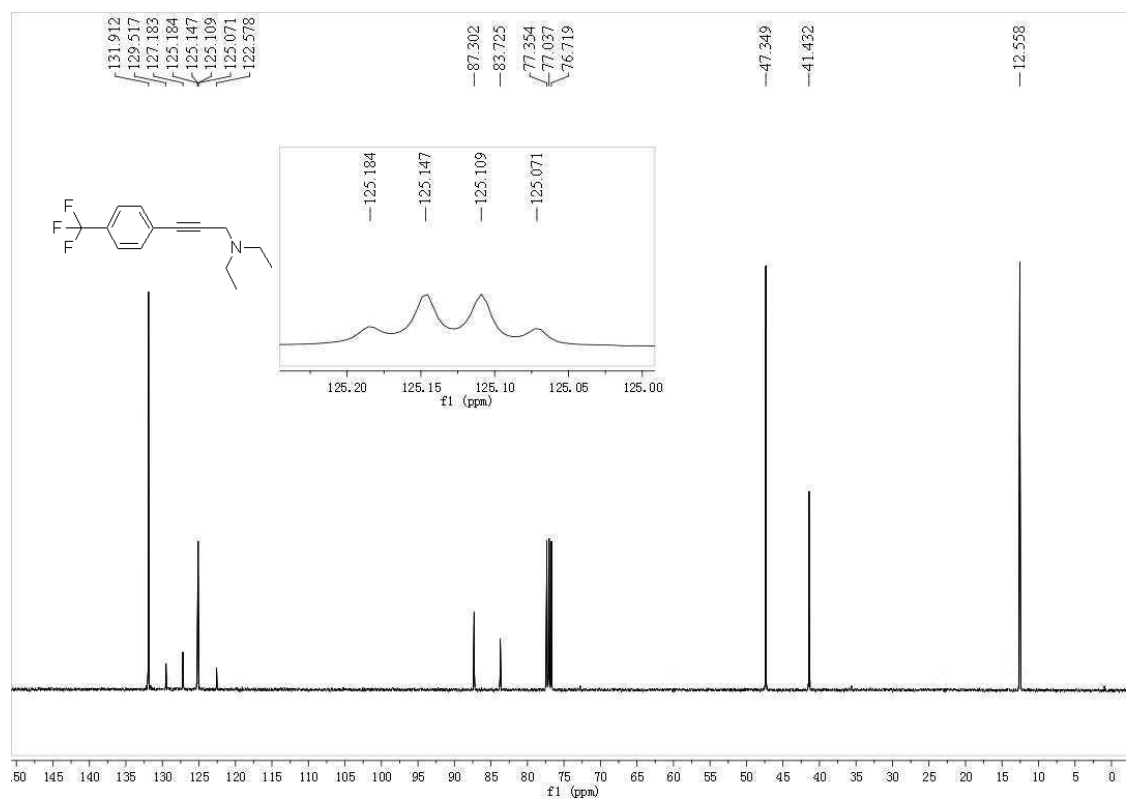

### $^1\text{H}$ NMR and $^{13}\text{C}$ NMR of **3r**

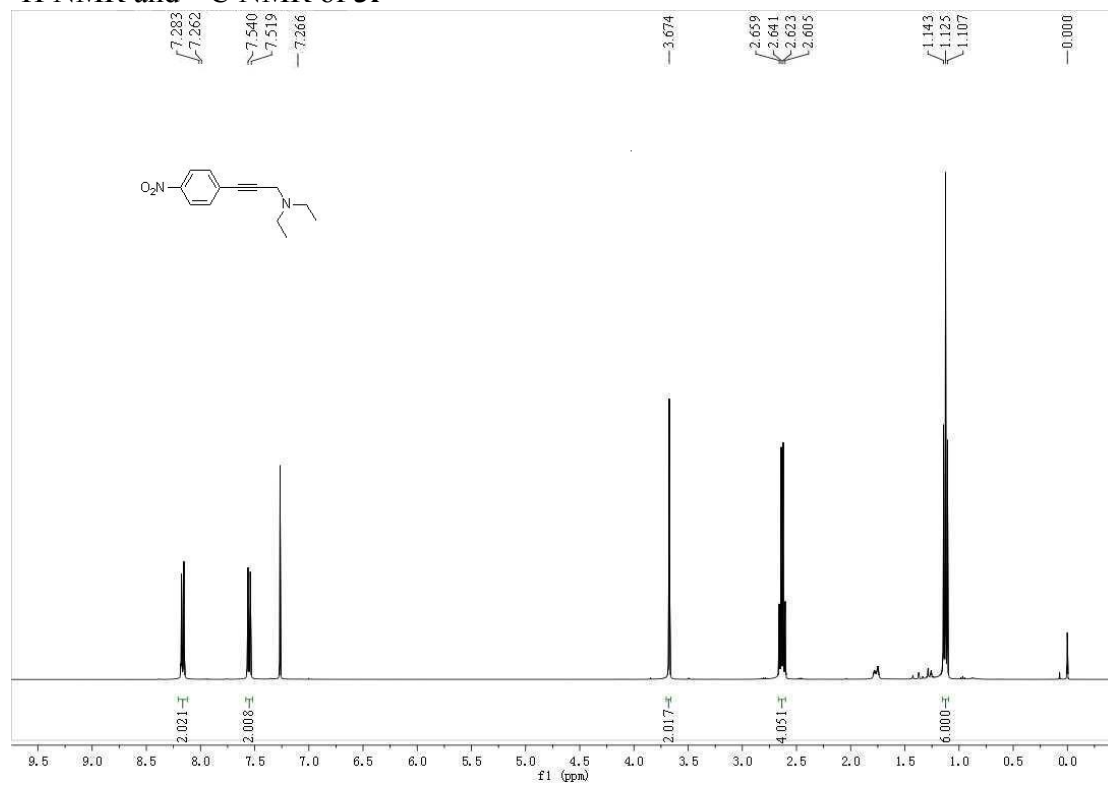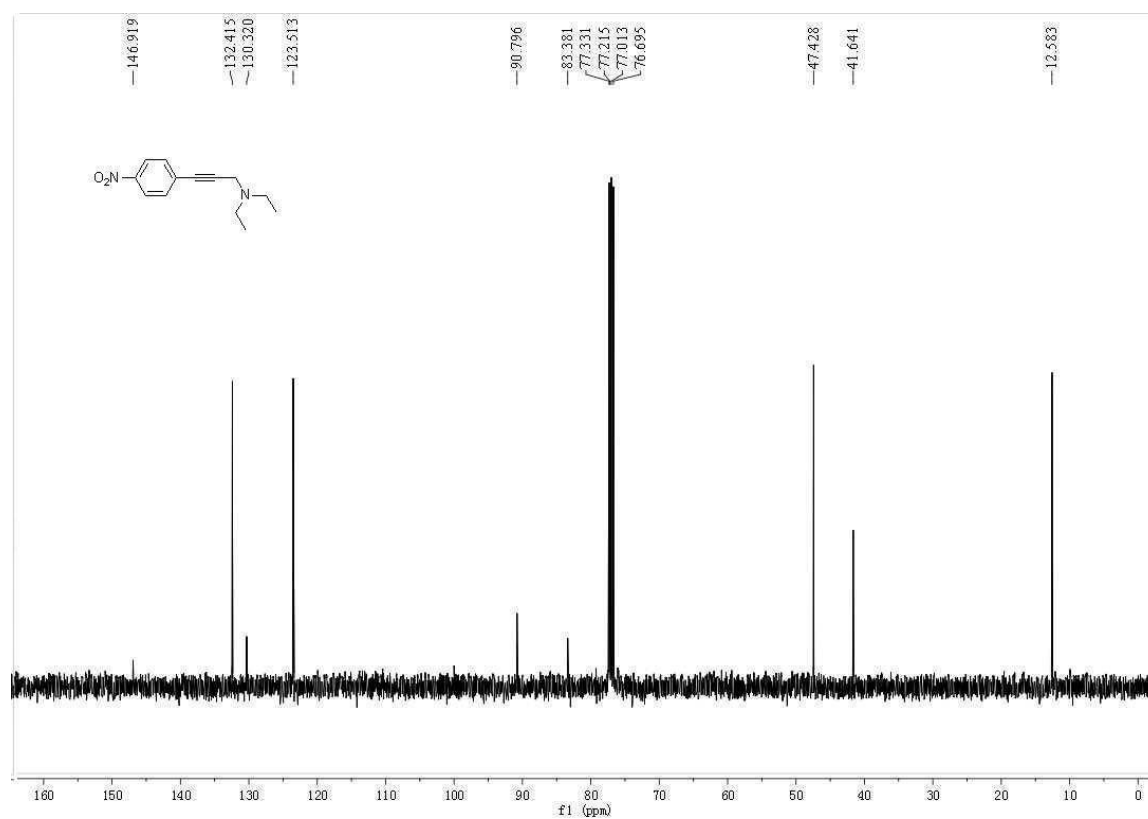

### $^1\text{H}$ NMR and $^{13}\text{C}$ NMR of **3s**

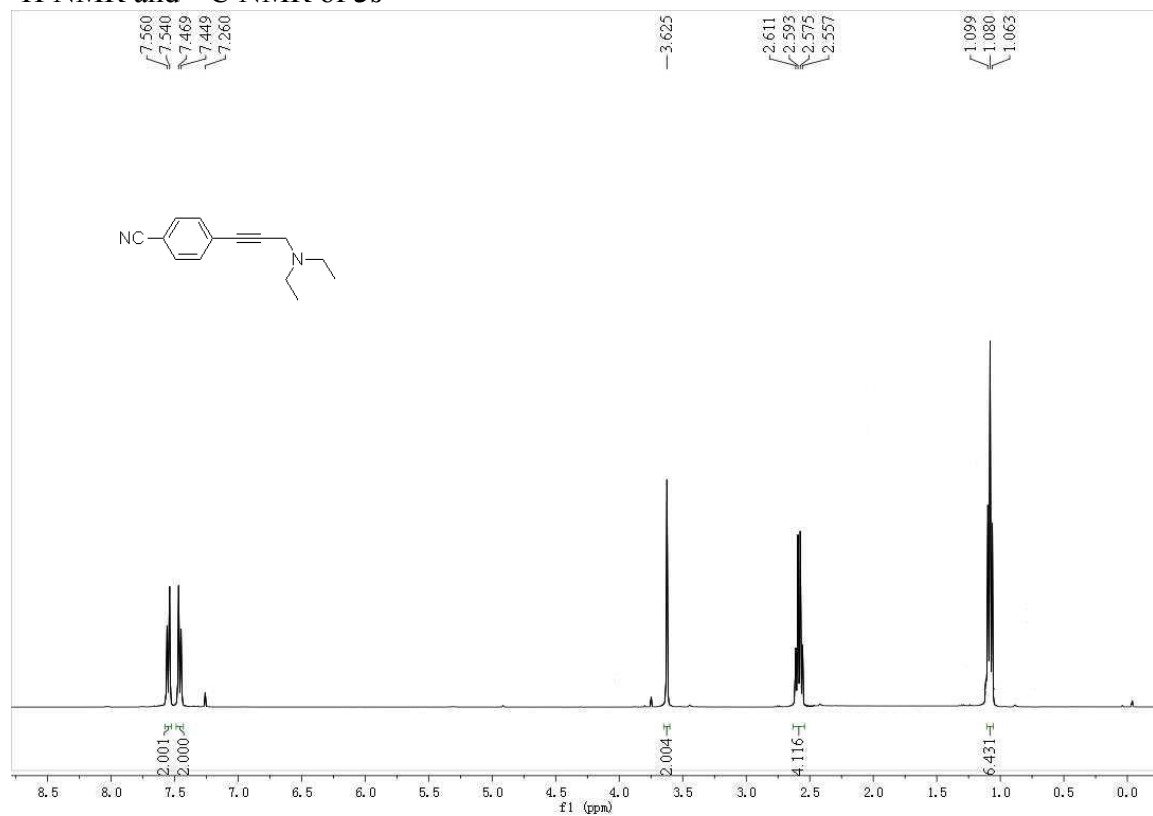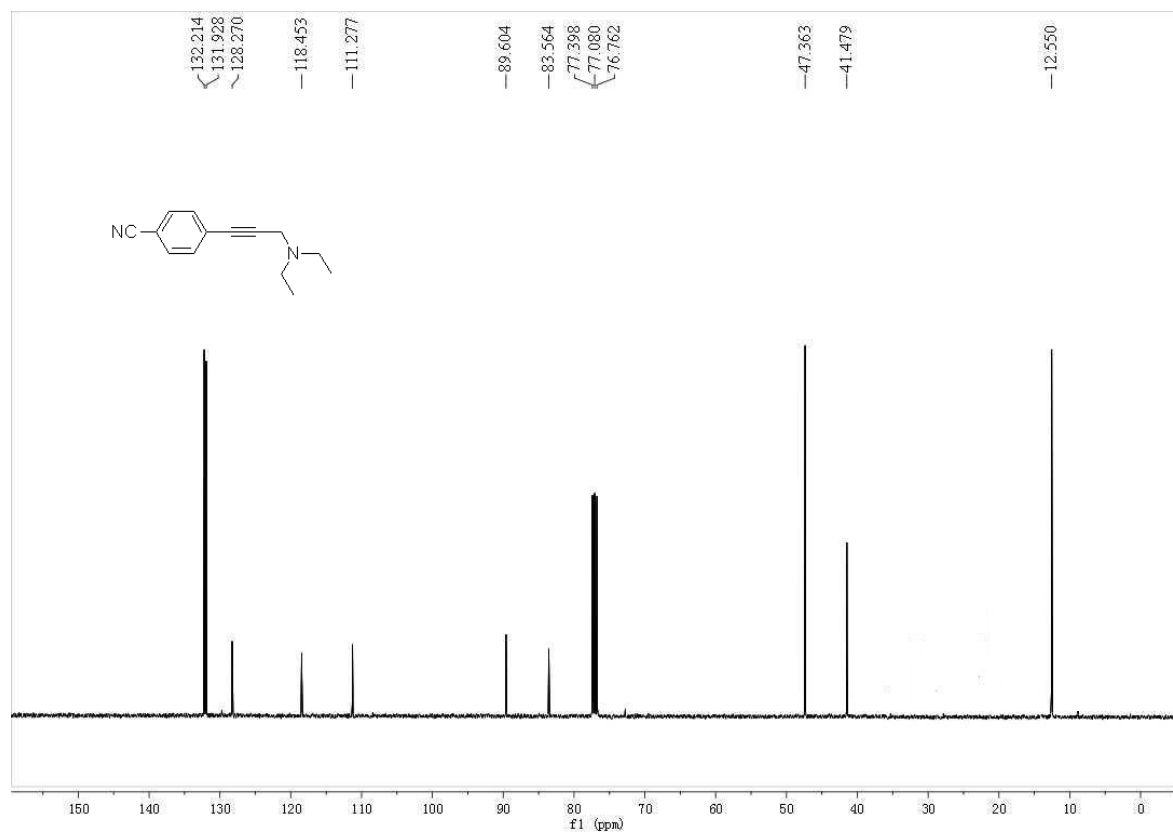

### $^1\text{H}$ NMR and $^{13}\text{C}$ NMR of **3t**

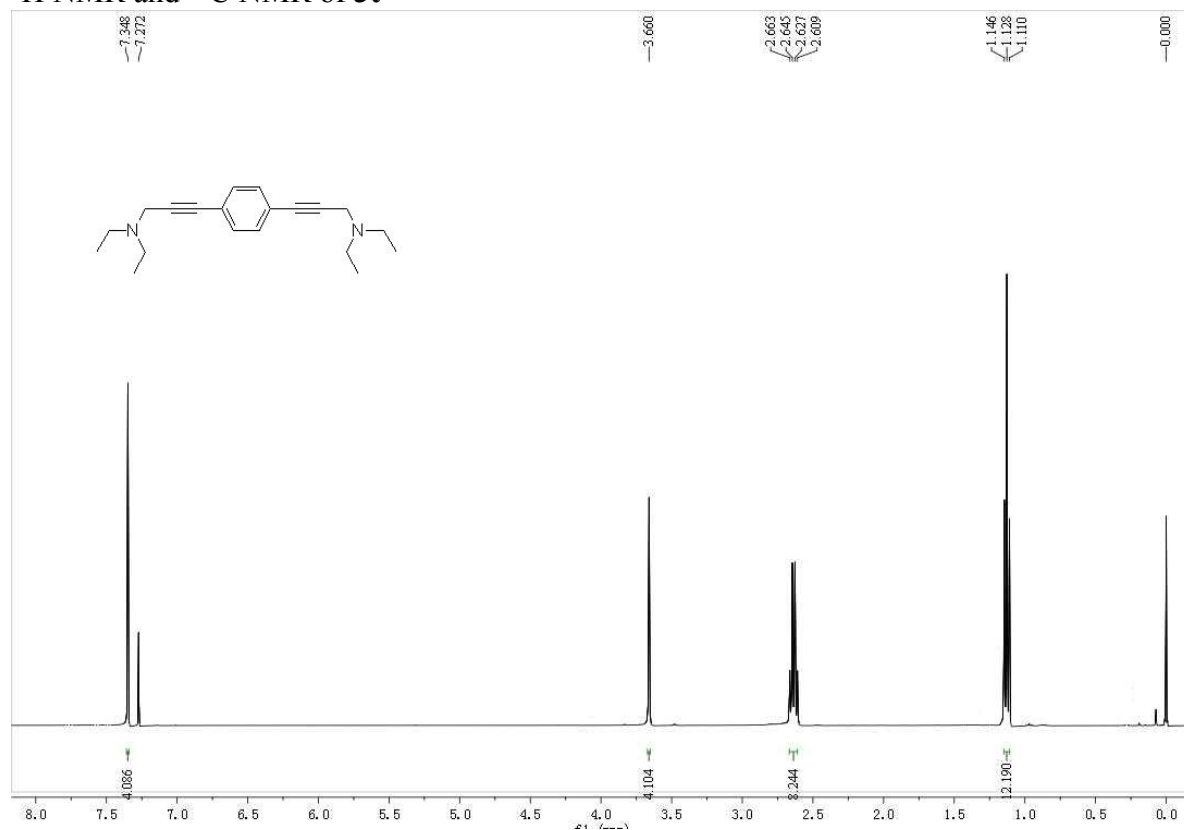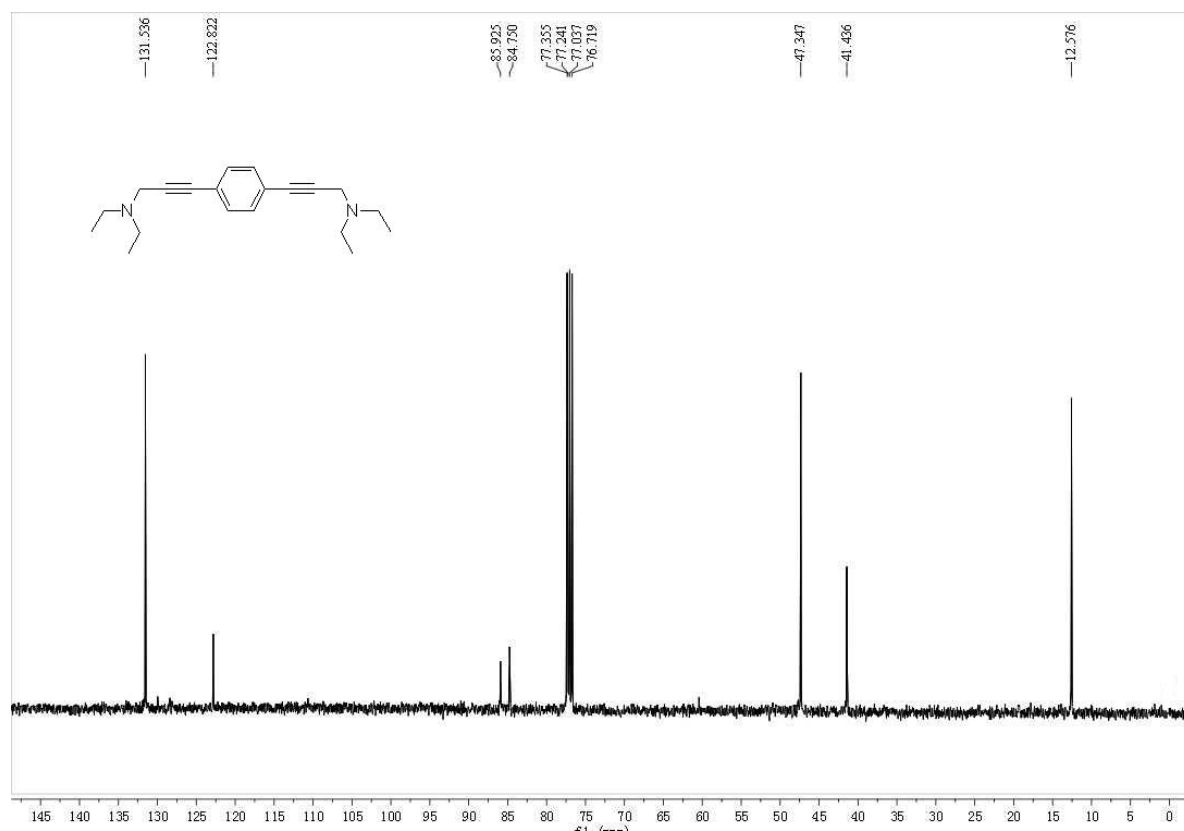

### $^1\text{H}$ NMR and $^{13}\text{C}$ NMR of **3u**

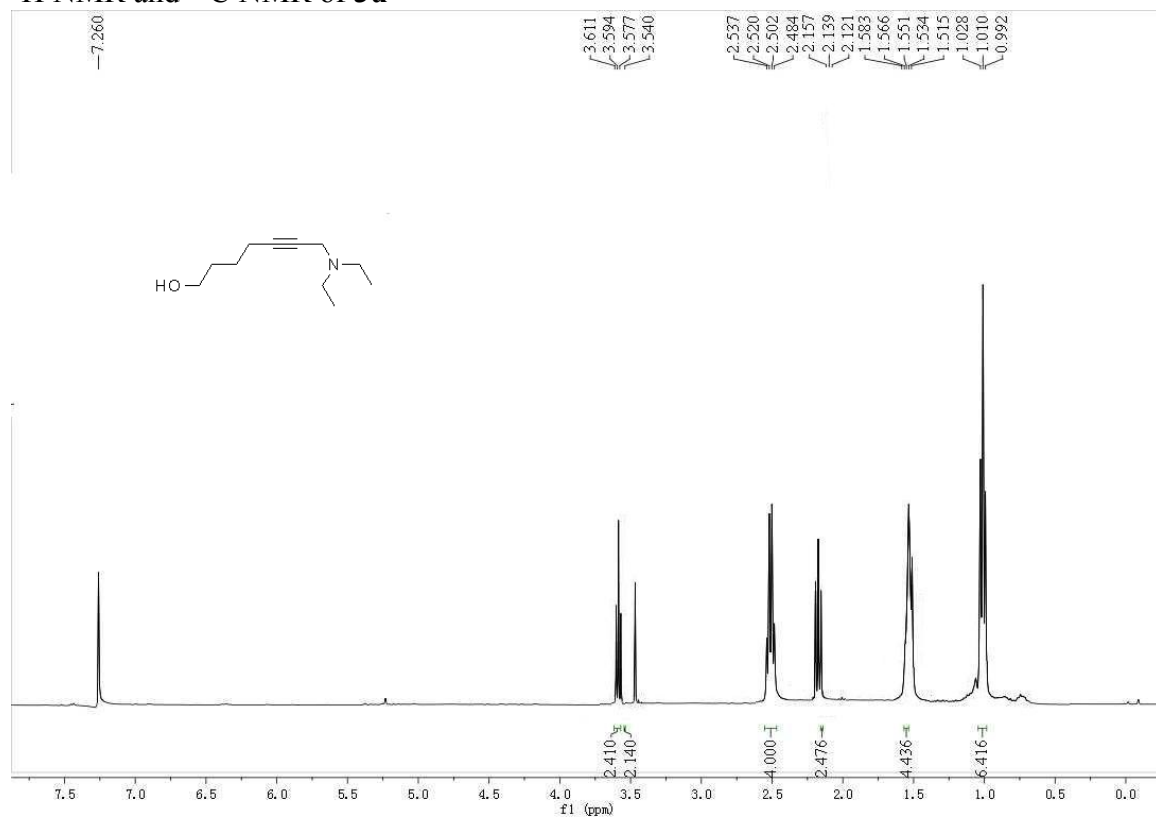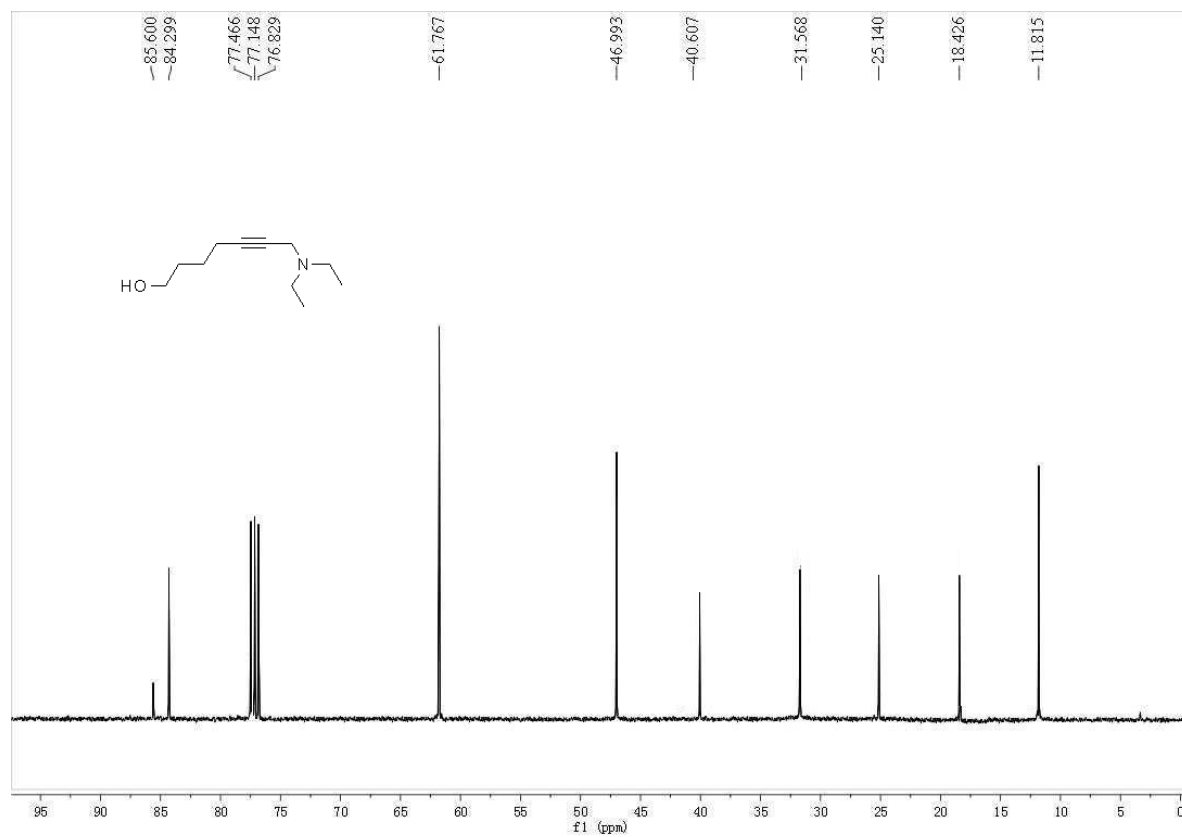



### $^1\text{H}$ NMR and $^{13}\text{C}$ NMR of **3v**

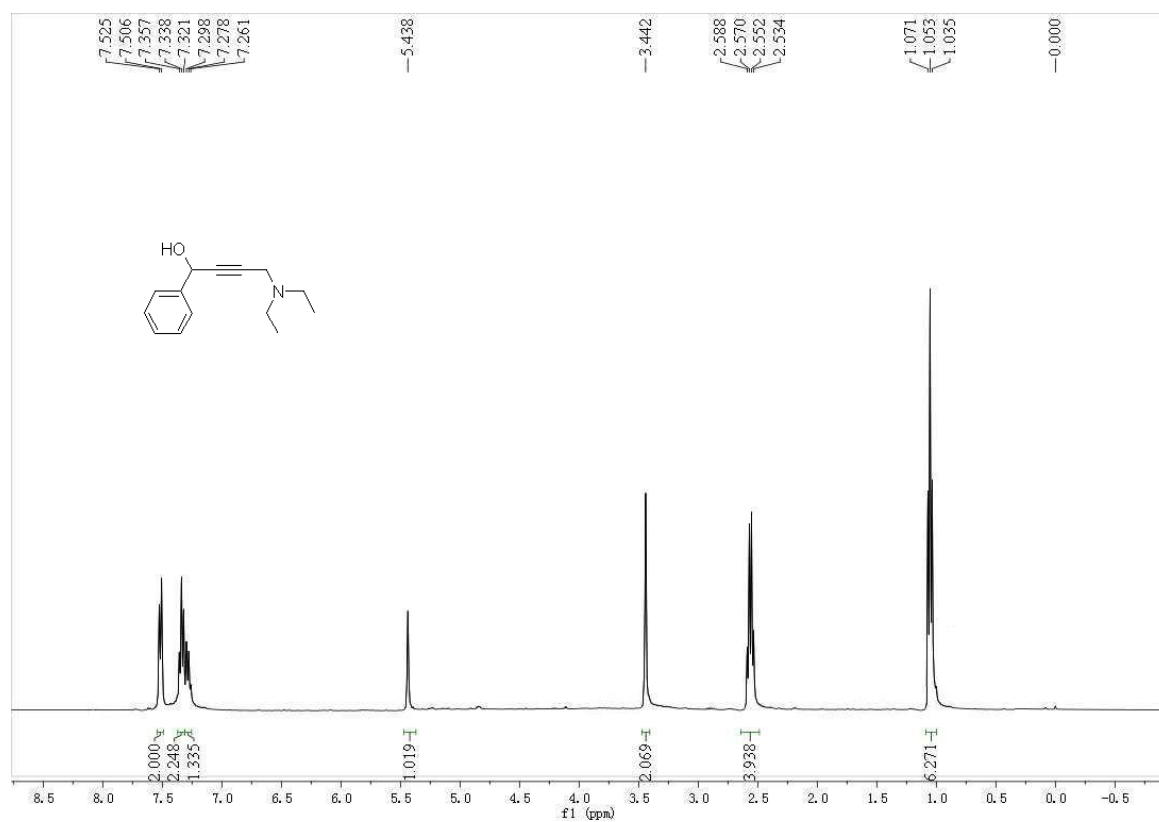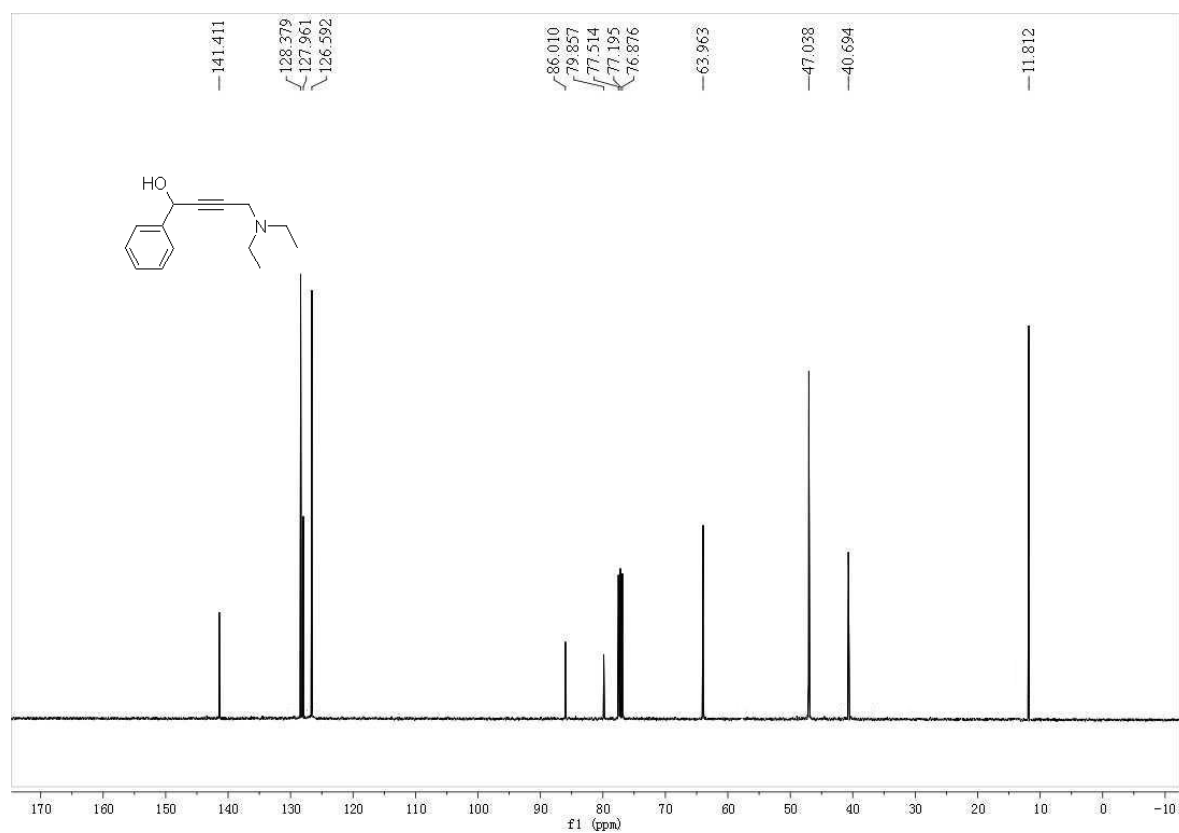

### $^1\text{H}$ NMR and $^{13}\text{C}$ NMR of **3w**

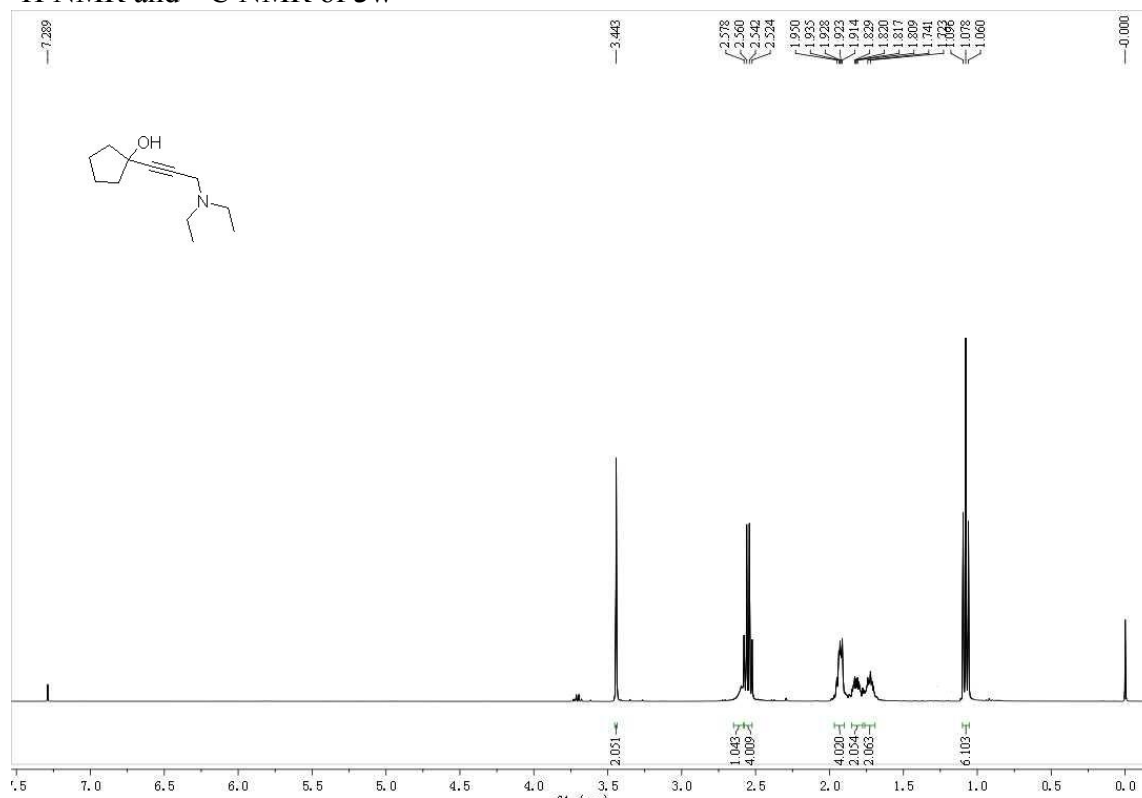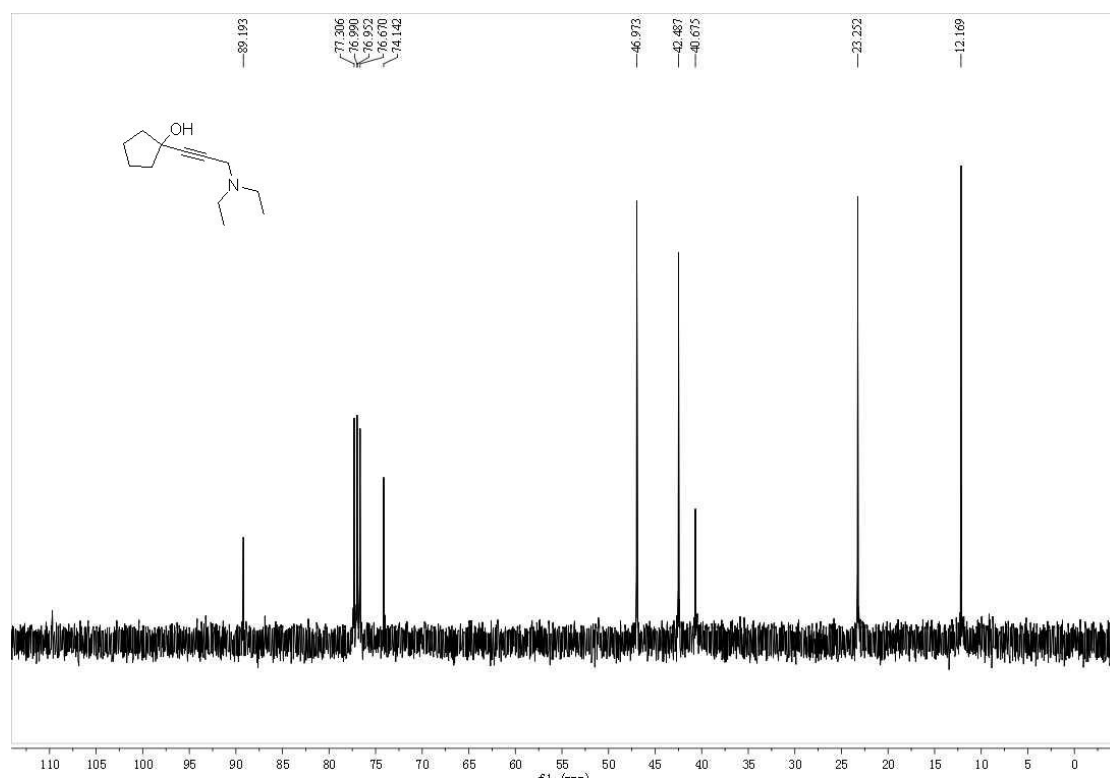

### $^1\text{H}$ NMR and $^{13}\text{C}$ NMR of **3x**

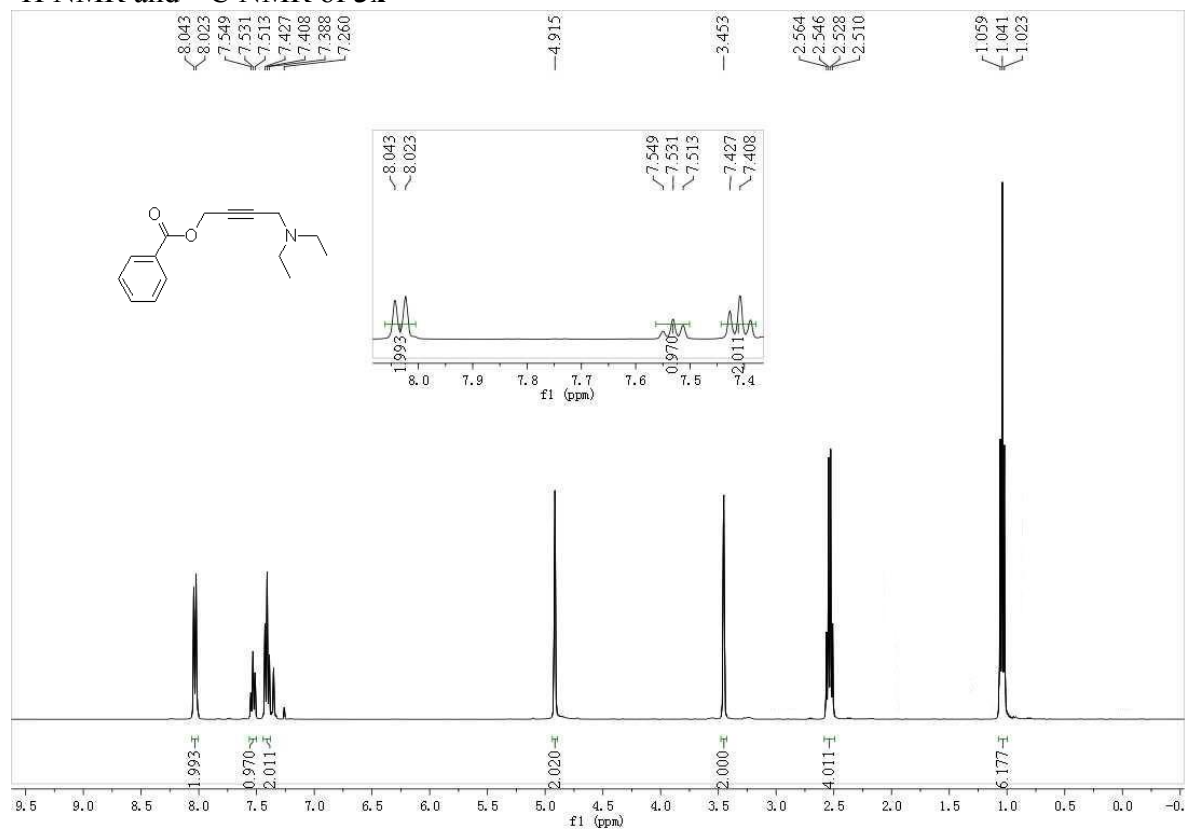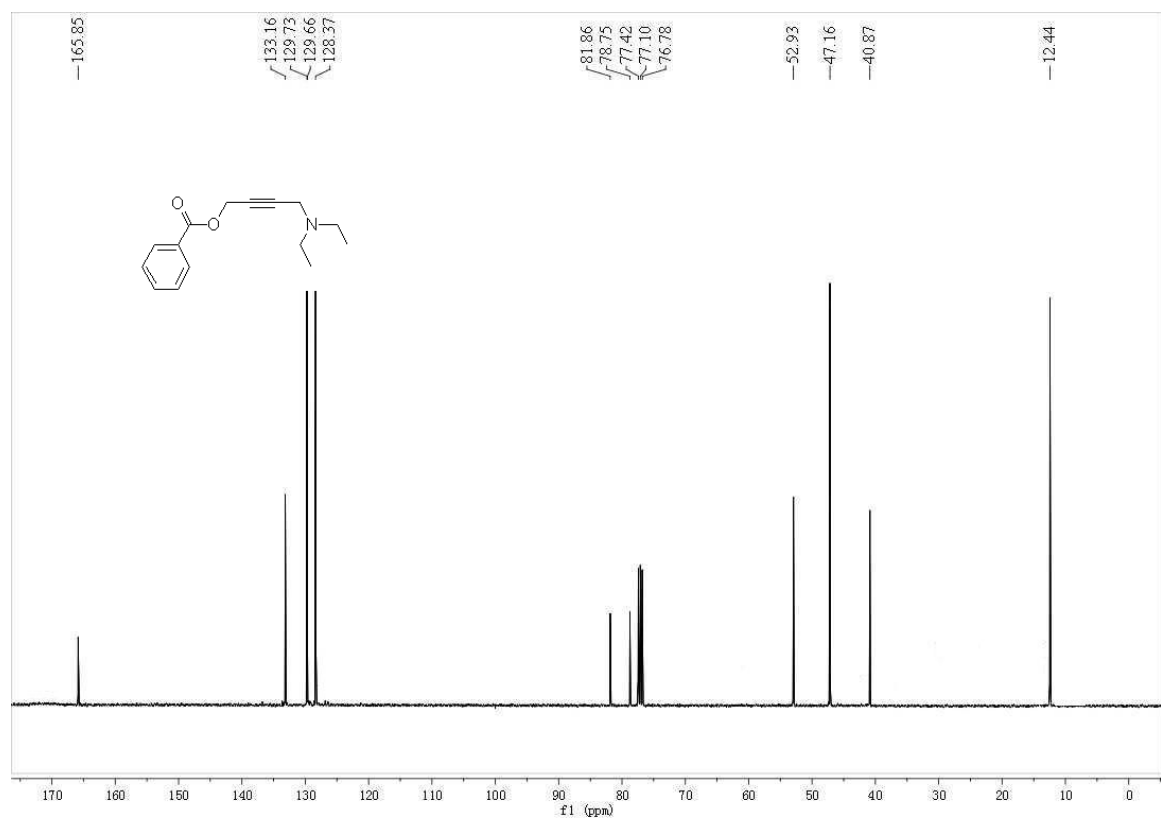

### $^1\text{H}$ NMR and $^{13}\text{C}$ NMR of **3y**

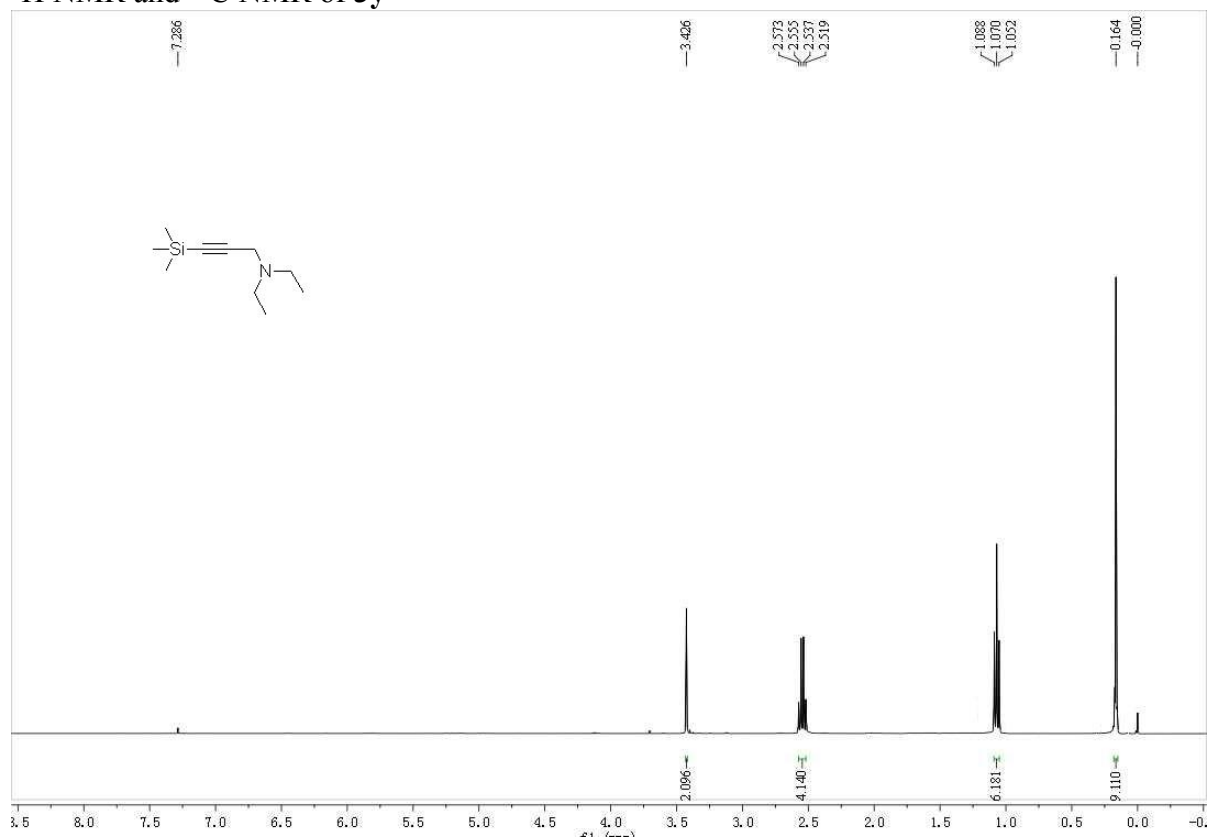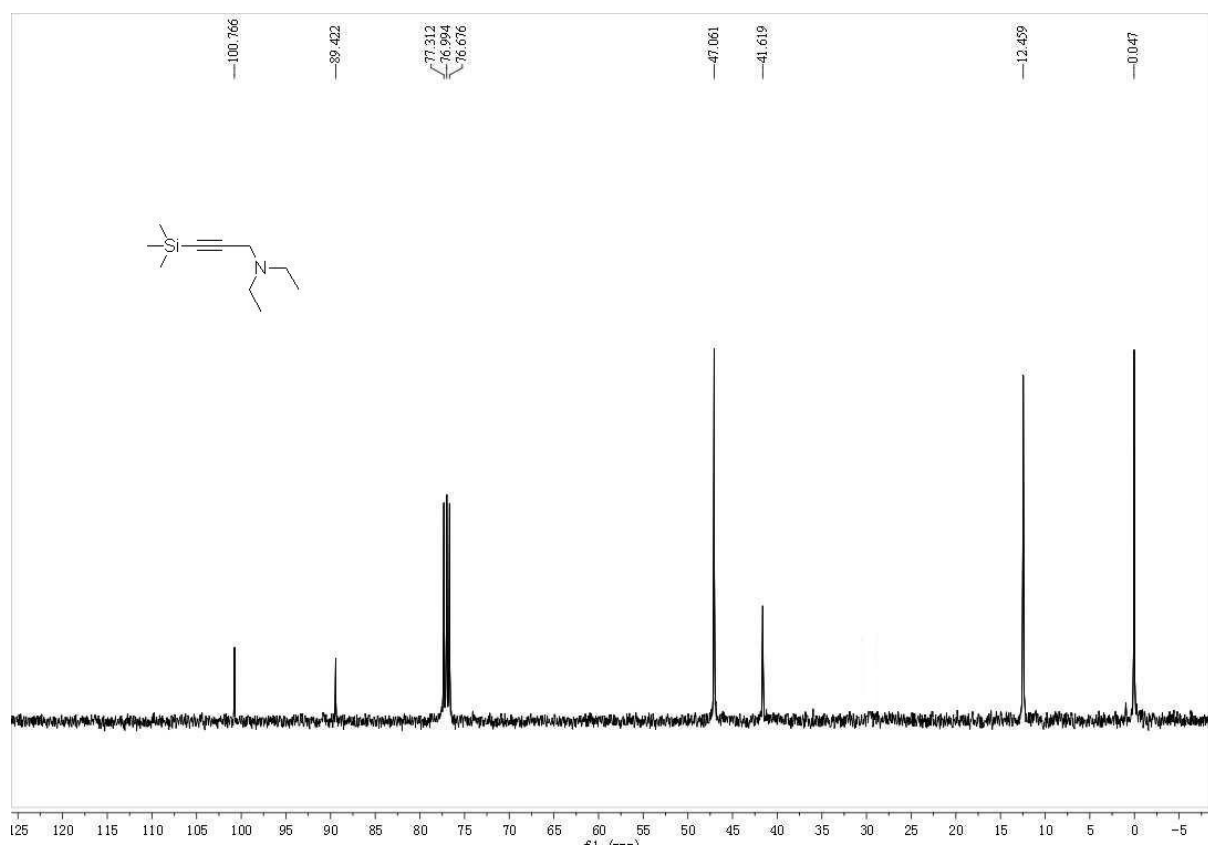

### $^1\text{H}$ NMR and $^{13}\text{C}$ NMR of **3z**

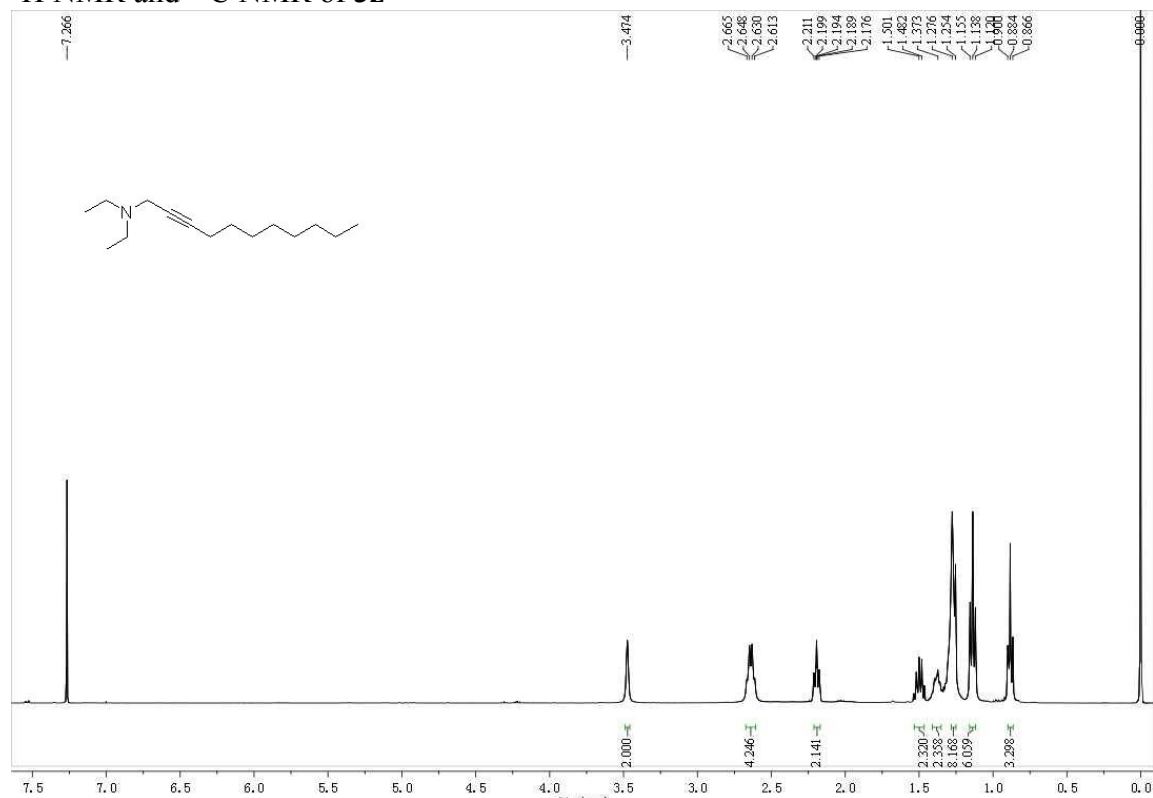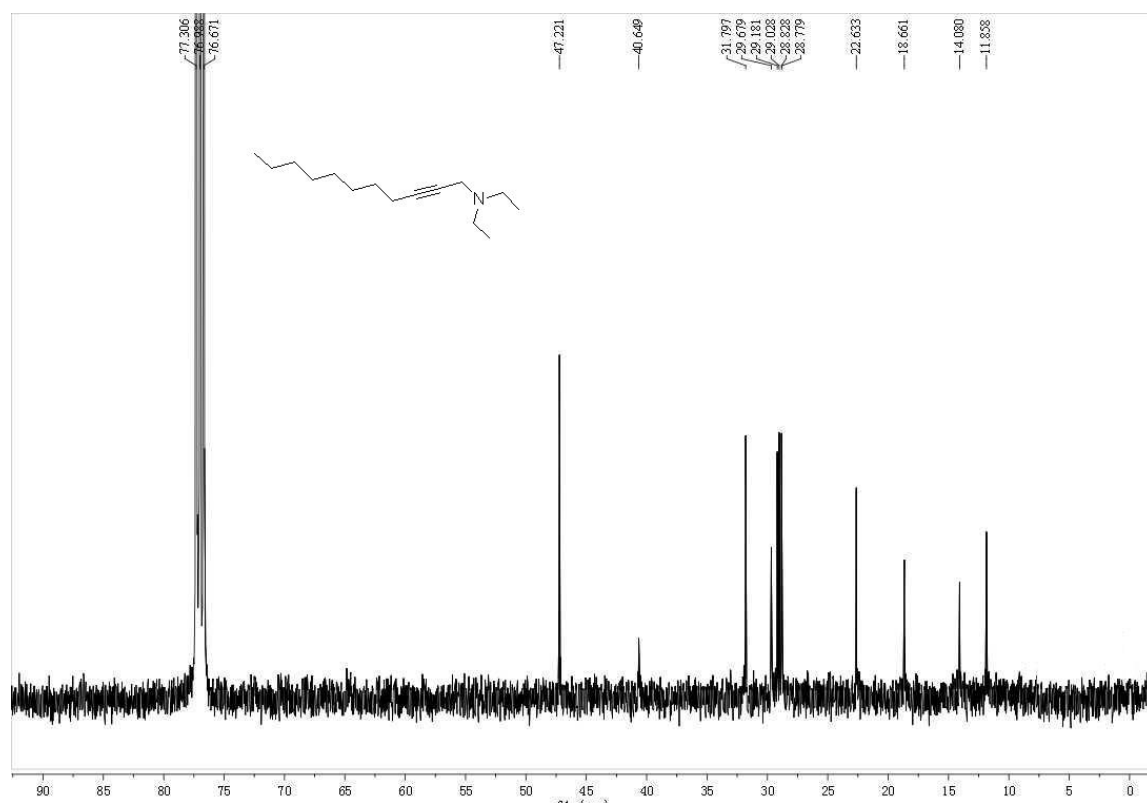

### $^1\text{H}$ NMR and $^{13}\text{C}$ NMR of **3z<sub>1</sub>**

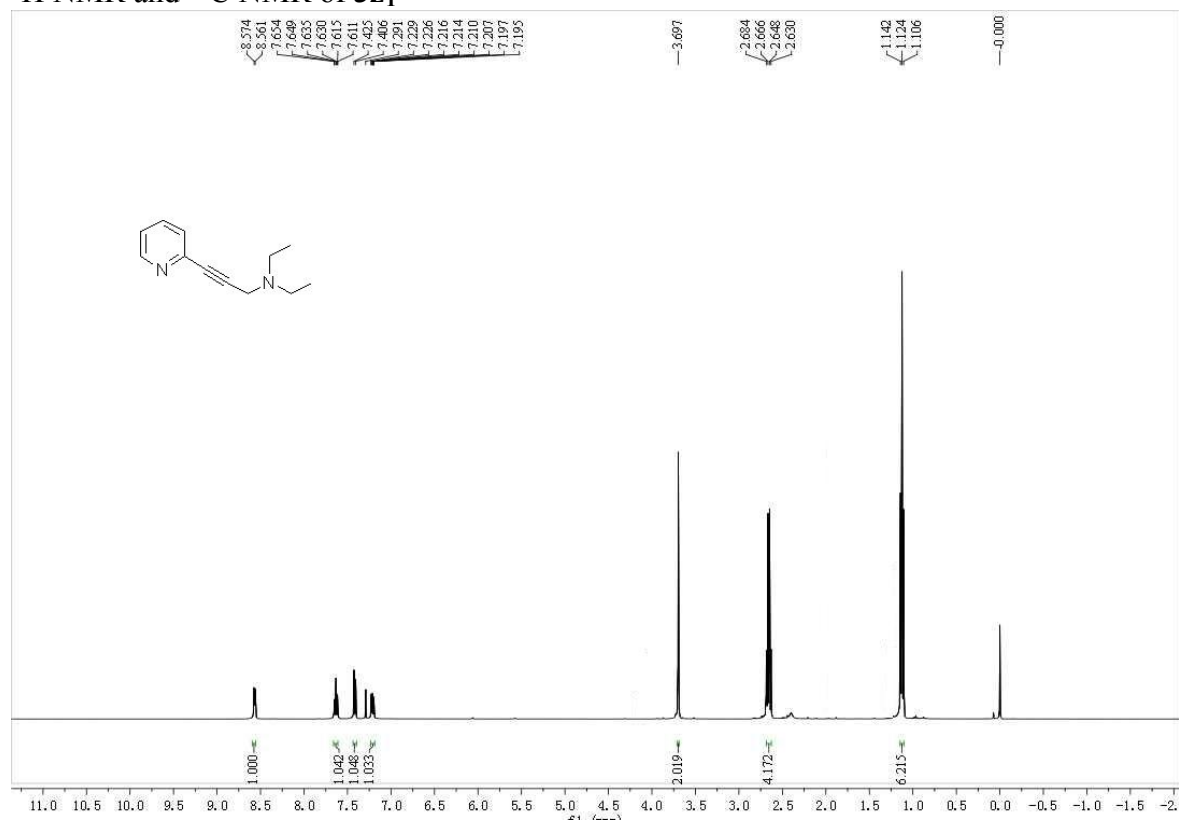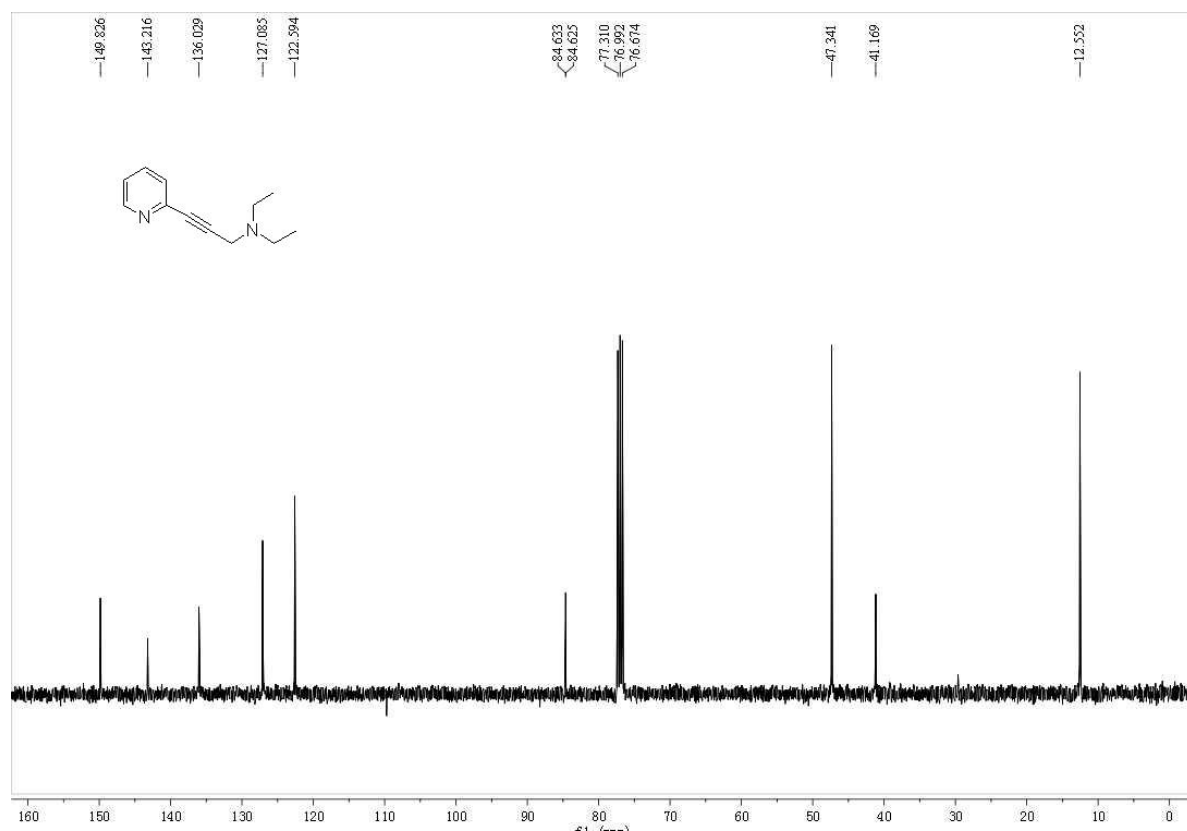

### $^1\text{H}$ NMR and $^{13}\text{C}$ NMR of **3z<sub>2</sub>**

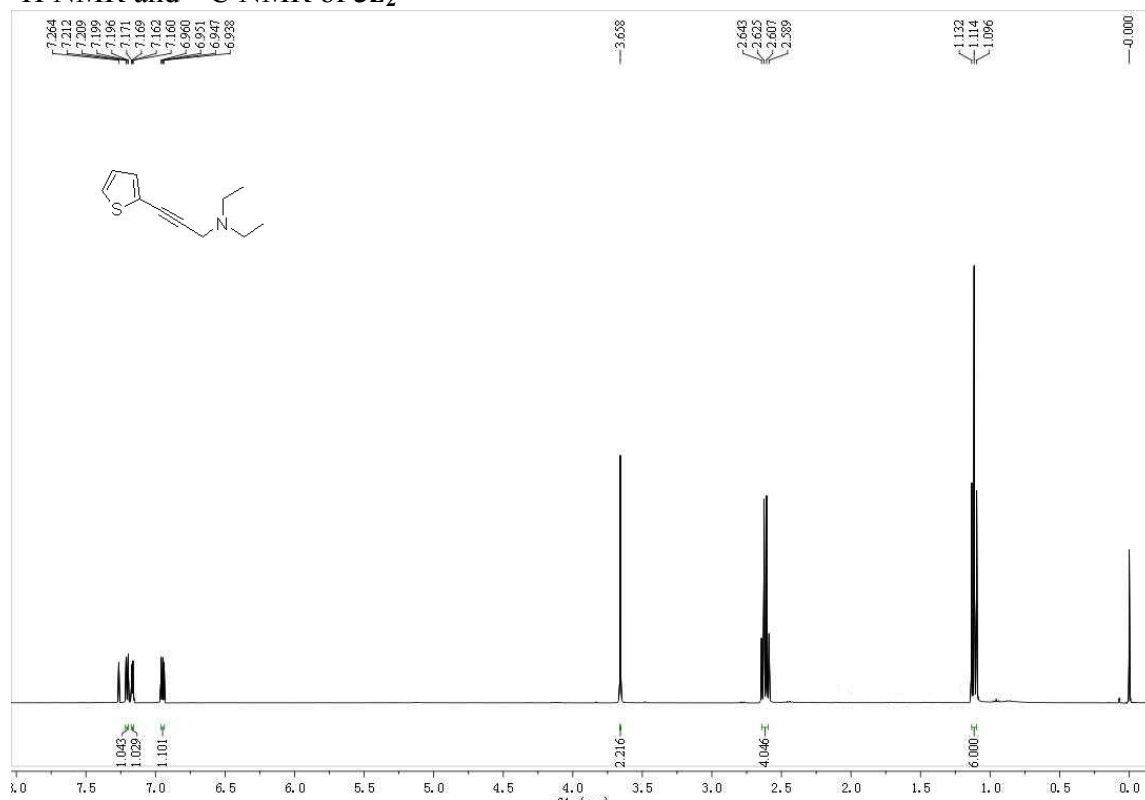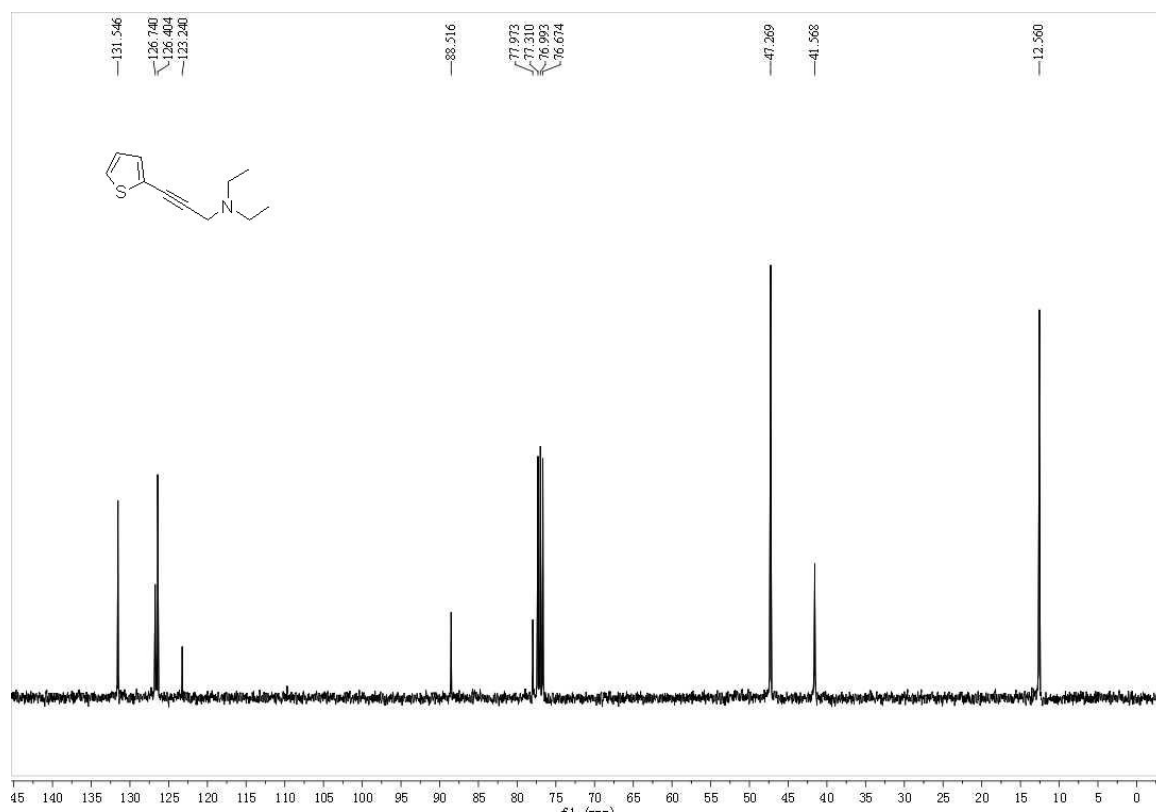

### $^1\text{H}$ NMR and $^{13}\text{C}$ NMR of **3z3**

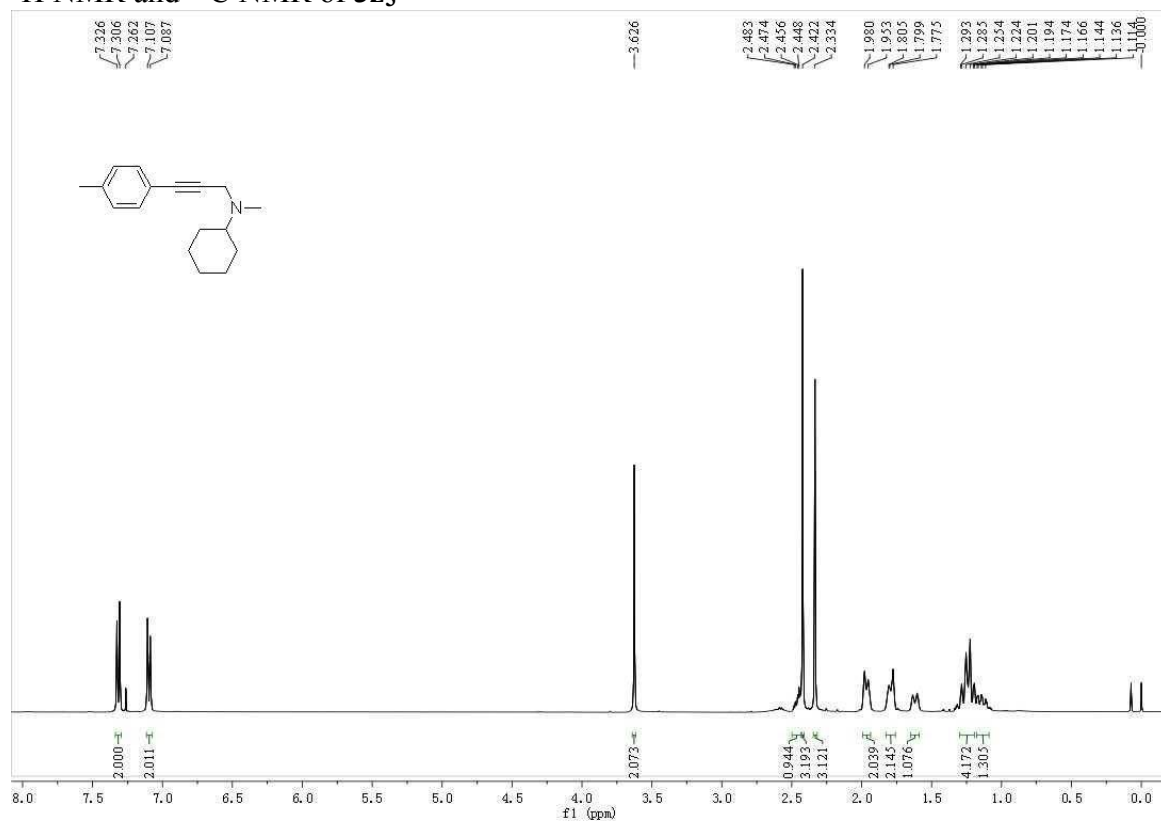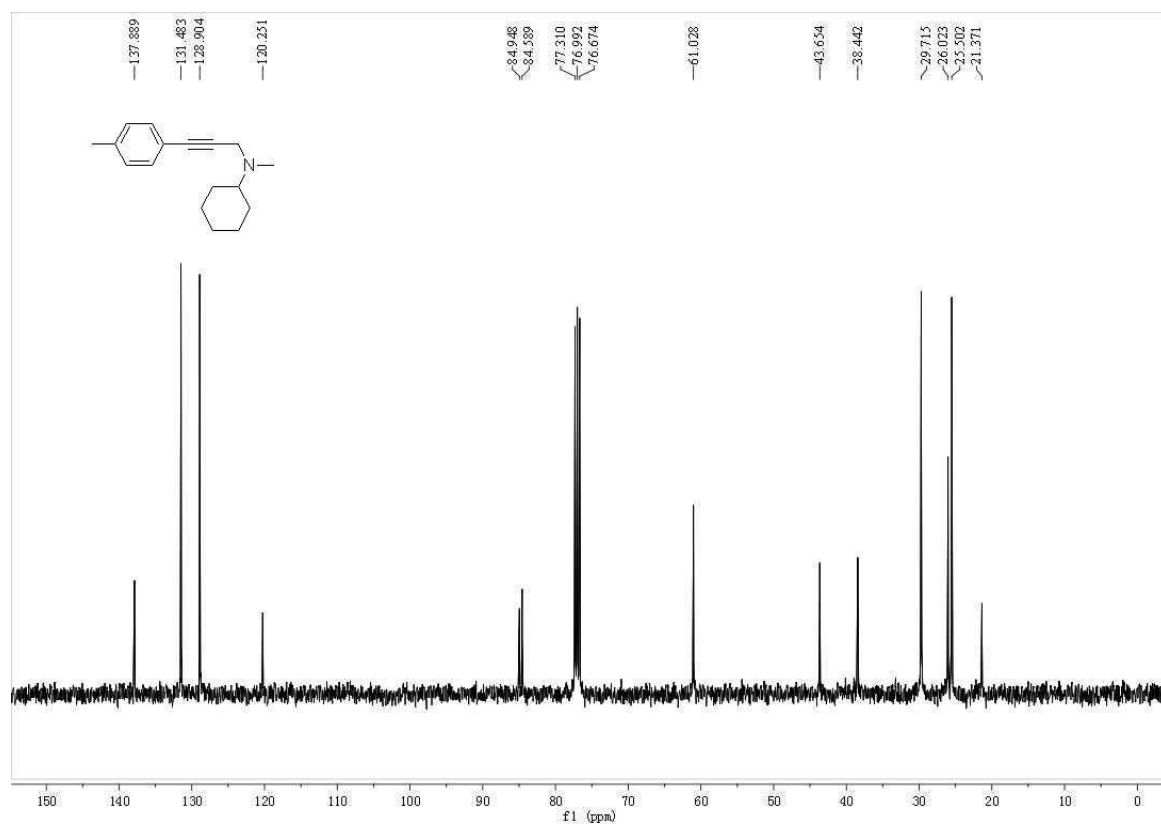



### $^1\text{H}$ NMR and $^{13}\text{C}$ NMR of **3z4**

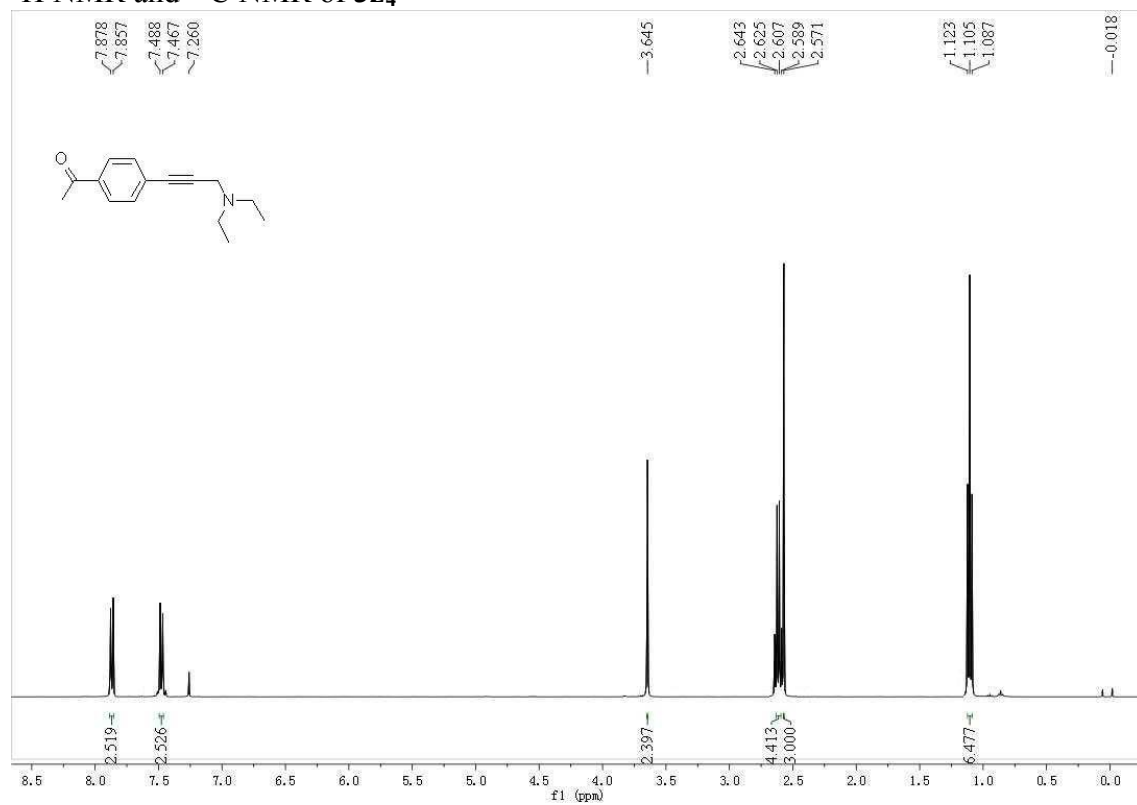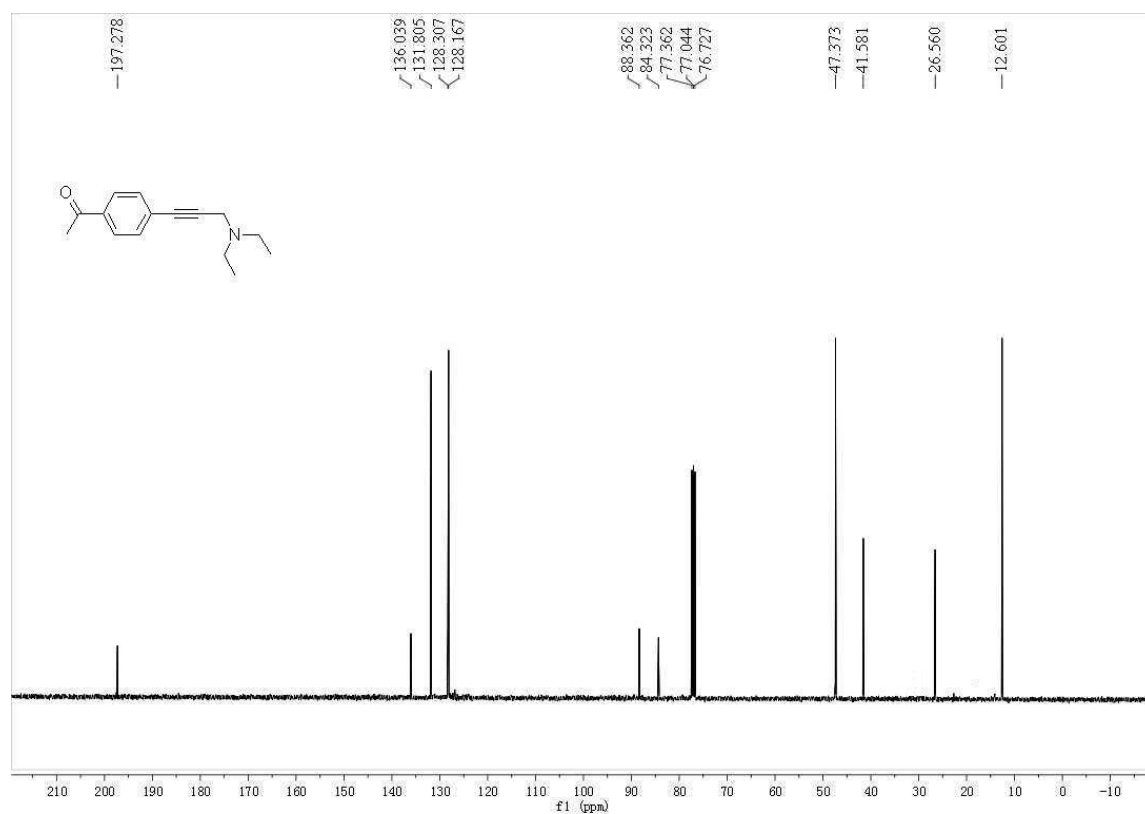

### $^1\text{H}$ NMR and $^{13}\text{C}$ NMR of **3z<sub>5</sub>**

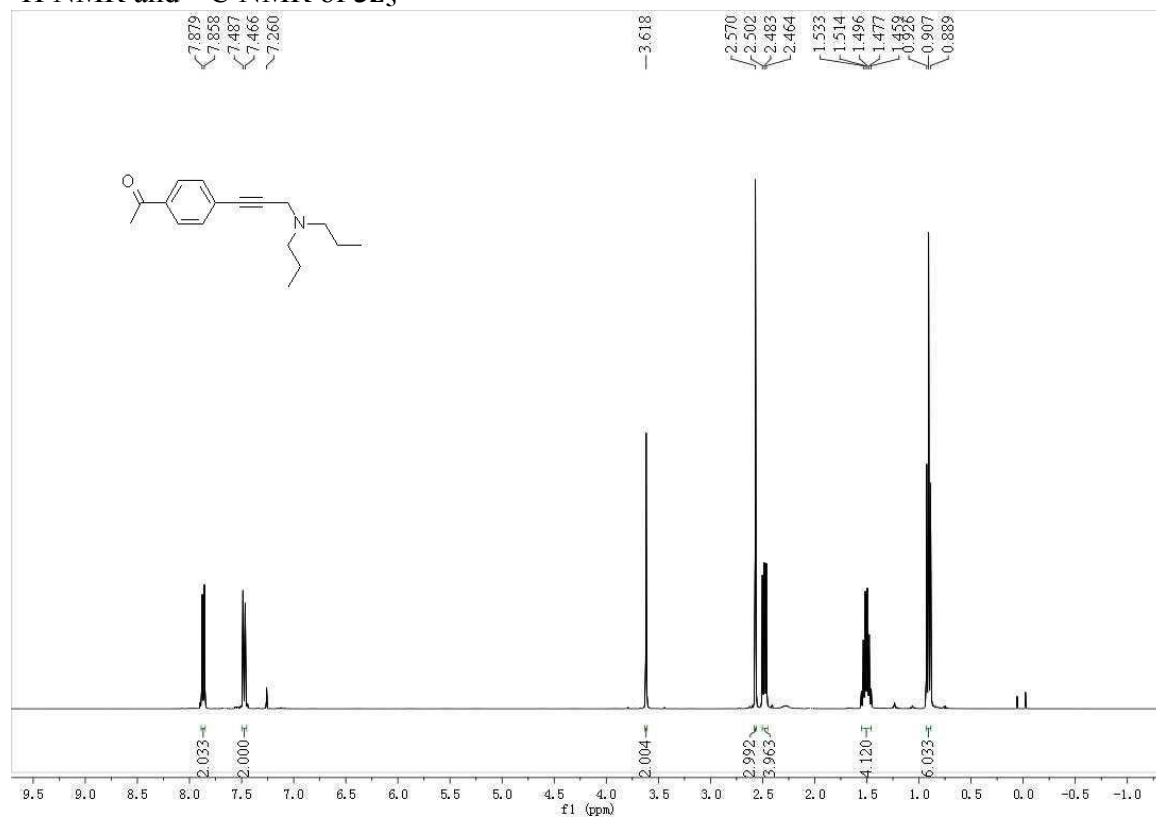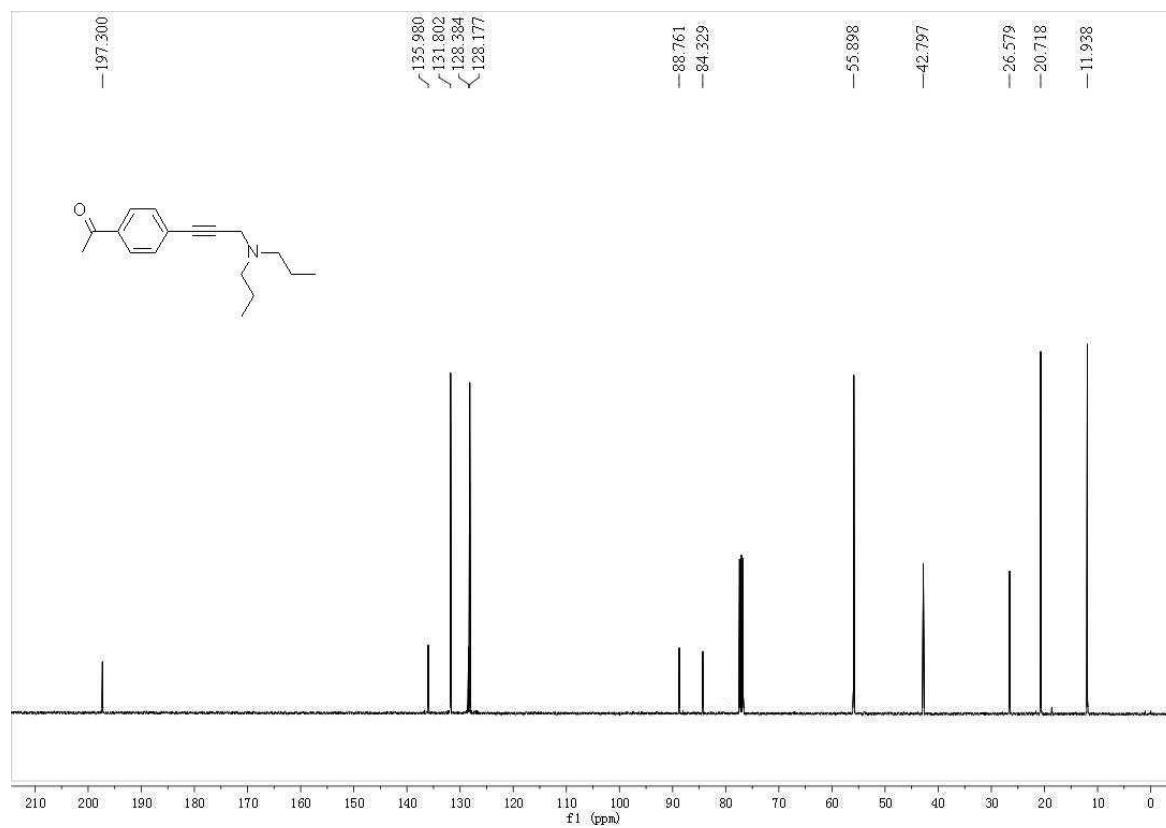

$^1\text{H}$  NMR of **4a**

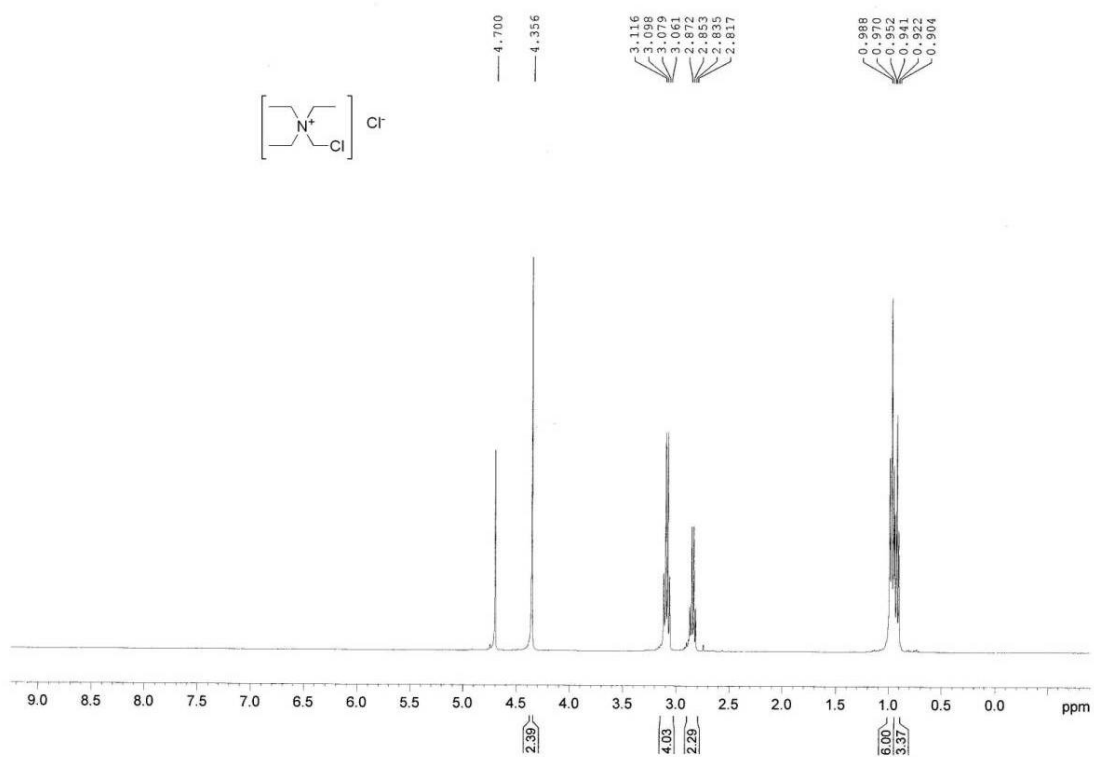

### $^1\text{H}$ NMR and $^{13}\text{C}$ NMR of **3a-d**

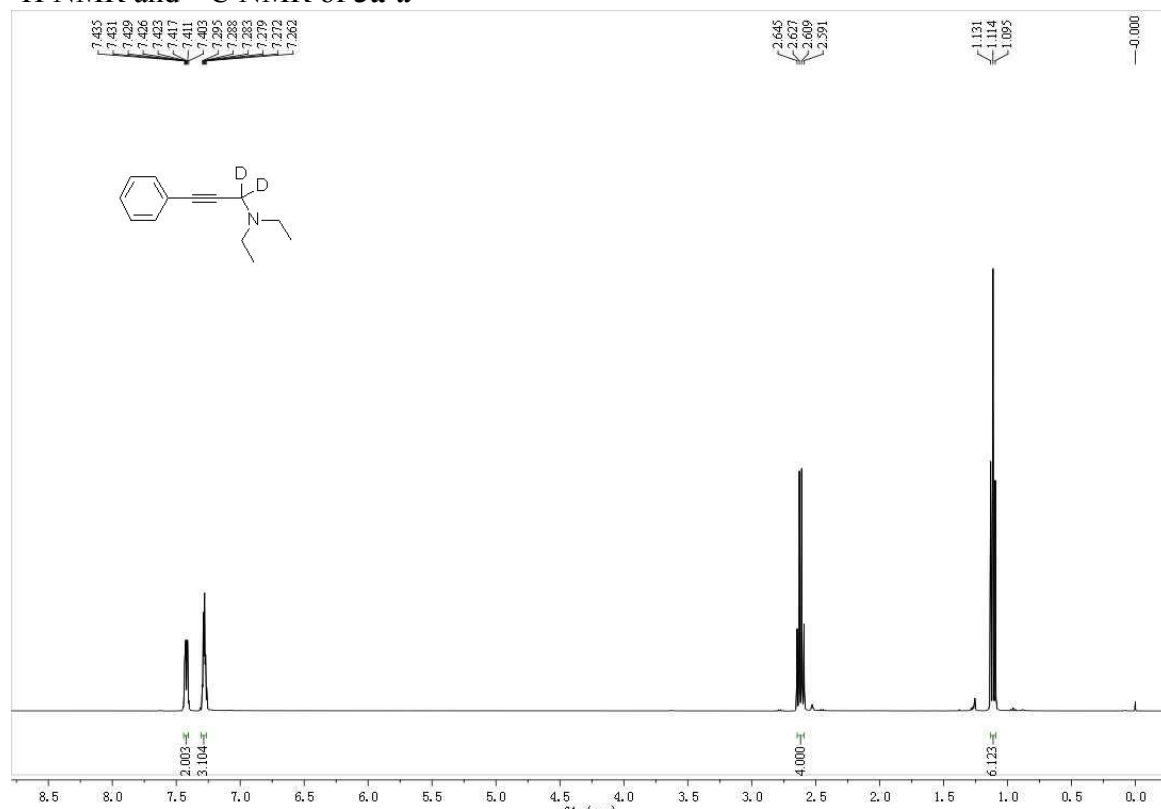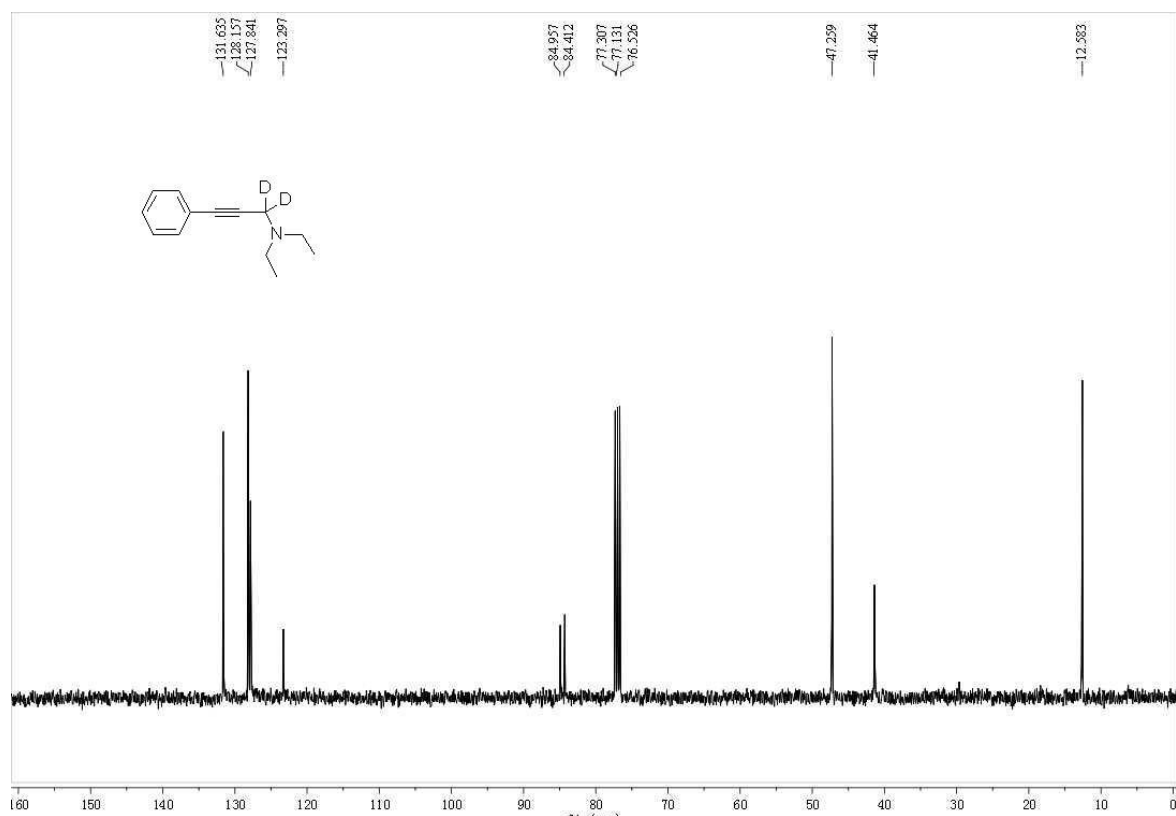

Supplement: c3ob41878b.pdf [file c3ob41878b.pdf]
